# Supplementary material
Source: publisher site journal article supplement (https://www.dovepress.com/article/551806)
Supplement: Supplementary file 1 [file 551806%20Supplementary%20Materials.docx]

Supplemental of Electroacupuncture reduces waistline in patients with abdominal obesity: A randomized controlled trial with mechanistic analysis of lipidomic and intestinal microbiota.

[Figure S1 2](#_Toc208405088)

[Figure S2 3](#_Toc208405089)

[Figure S3 4](#_Toc208405090)

[Figure S4 5](#_Toc208405091)

[Table S1 6](#_Toc208405092)

[Table S2 7](#_Toc208405093)

[Table S3 8](#_Toc208405094)

[Table S4 9](#_Toc208405095)

[Study protocol 104](#_Toc208405096)

# Figure S1

Figure S1 Differential lipid species analyzed in HC versus pre-EA group and pre-EA versus post-EA group. Analysis of the principal component (PCA) 3D plot (A-B); OPLS-DA scores plots (C-D) analysis of HC versus pre-EA group and pre-EA versus post-EA group, respectively.


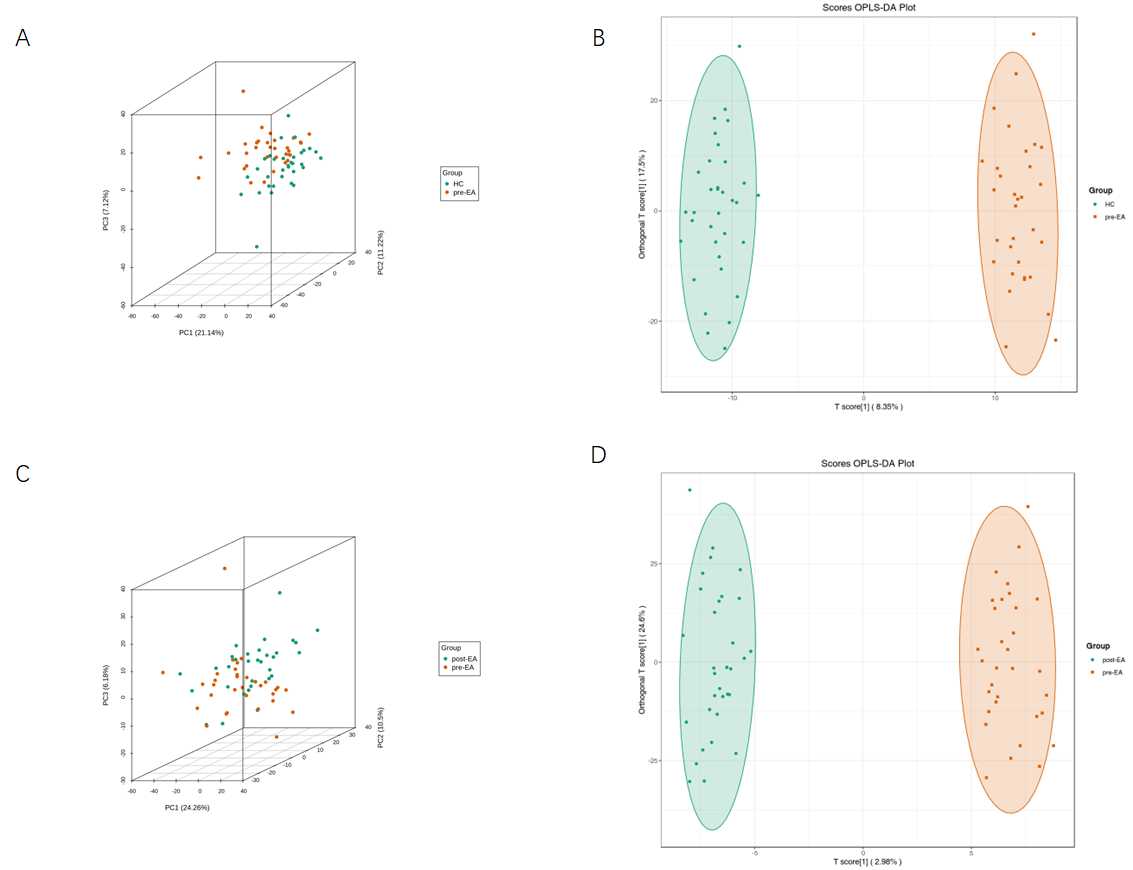


# Figure S2

Figure S2 The classification and enrichment results annotated pathway types by KEGG analysis. (A) classification analysis of KEGG pathway based on the significant differential lipids between HC versus pre-EA. (B) classification analysis of KEGG pathway based on the significant differential lipids between pre-EA versus post-EA. (C) enrichment analysis of KEGG pathway based on the significant differential lipids between HC versus pre-EA. (D) enrichment analysis of KEGG pathway based on the significant differential lipids between pre-EA versus post-EA.


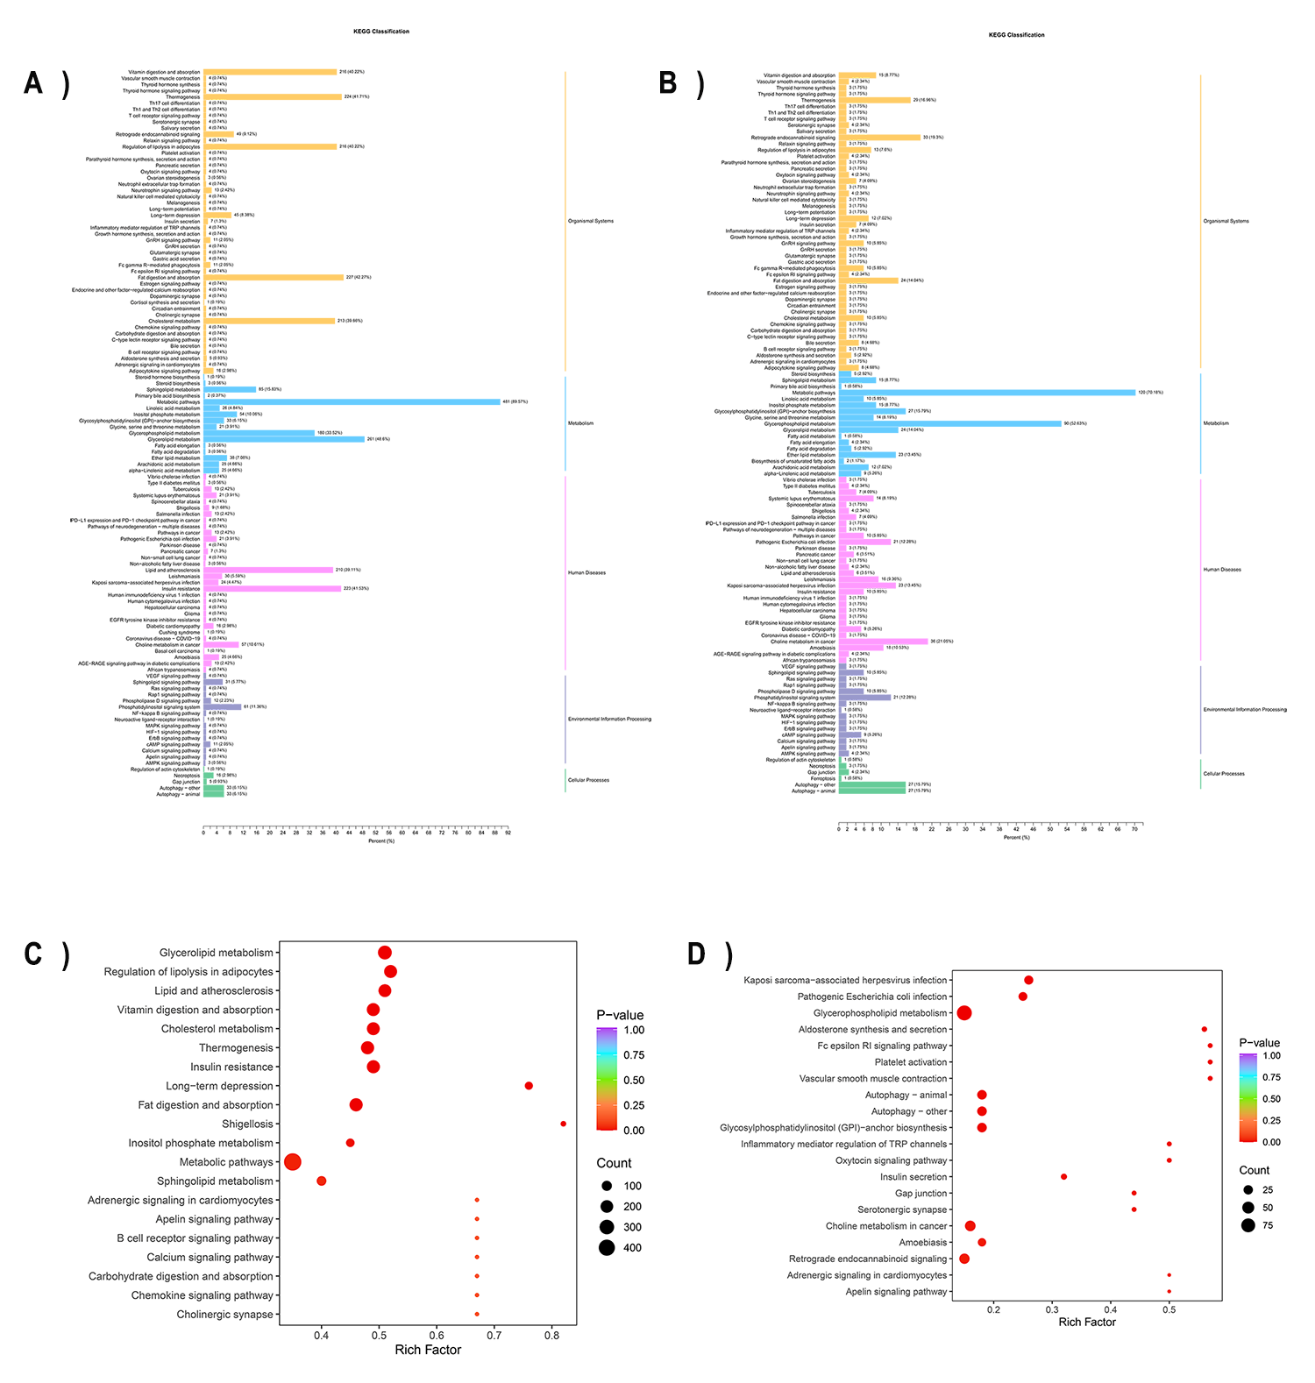


# Figure S3

Figure S3 Acupuncture treatment had a better effect on increasing the OTU numbers (indicating a better diversity) of intestinal microbiota. Shown are Venn diagrams of OTU numbers of intestinal microbiota. (A) pre-EA group, post-EA group and HC group; (B) pre-EA group and post-EA group; (C) pre-EA group and HC group; (D) post-EA group and HC group.


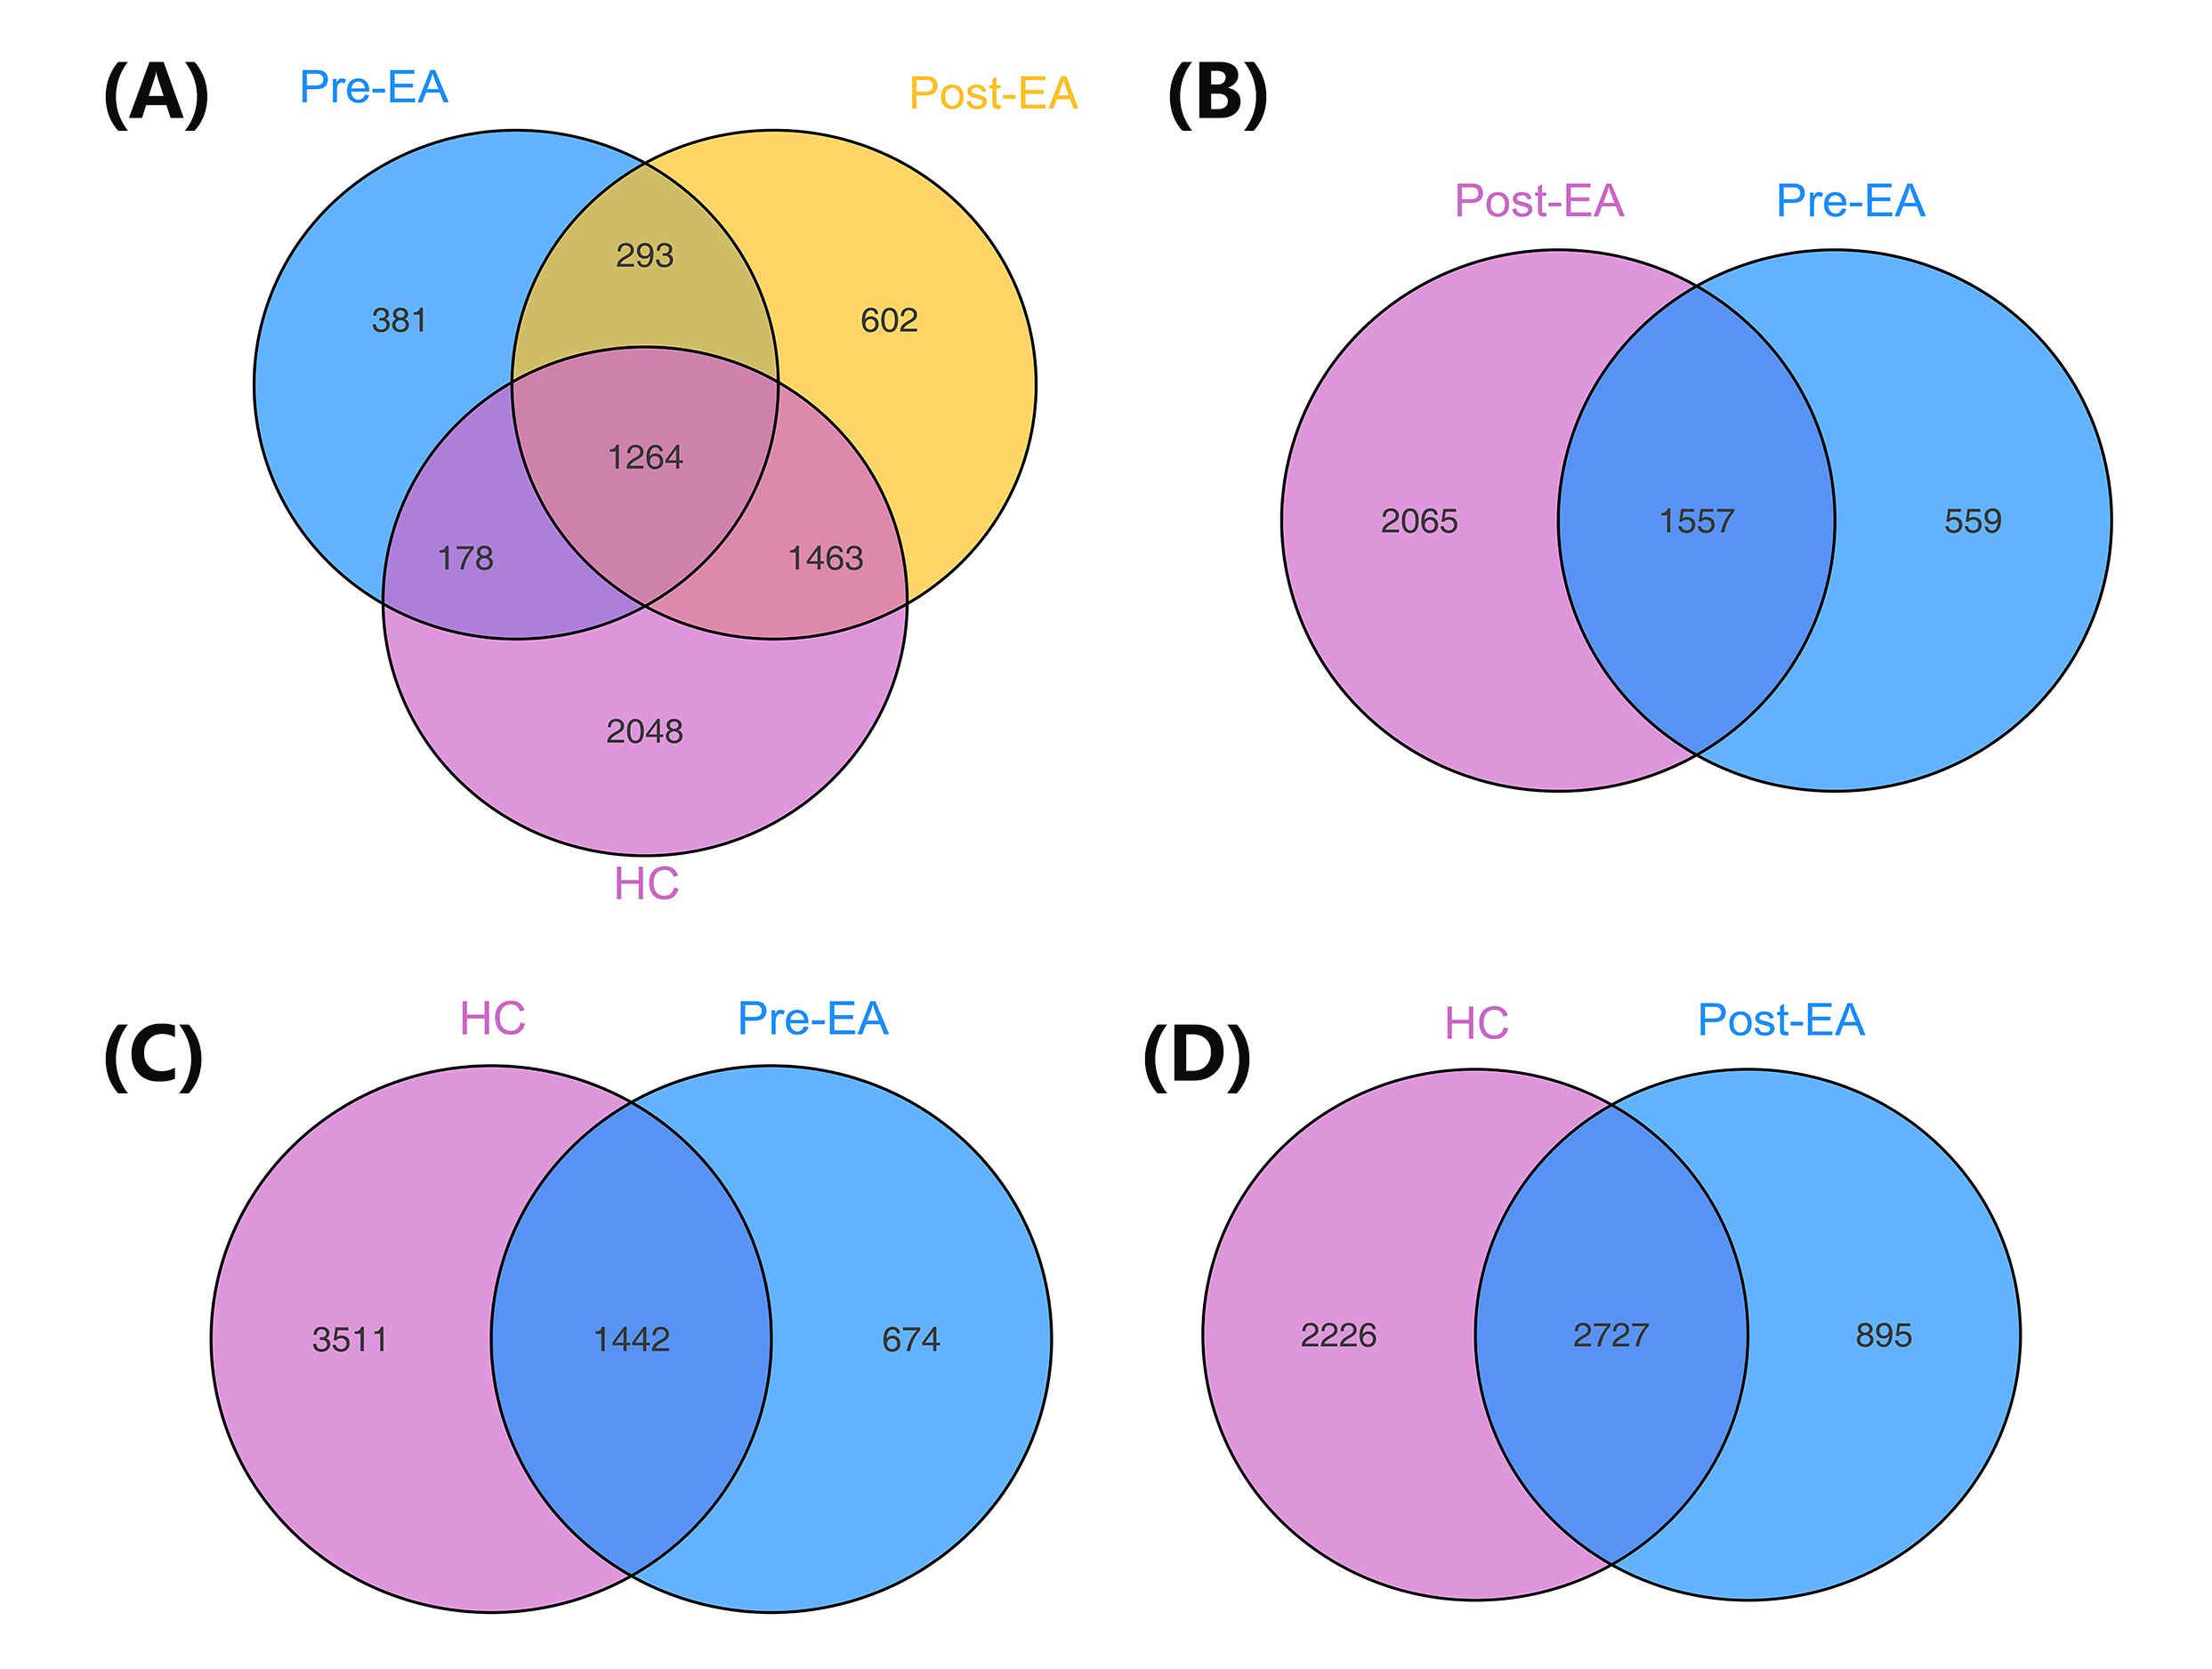


# Figure S4

Figure S4 Taxonomic distributions of bacteria from pre-EA group, post-EA group and HC group at phylum and genus level (A). Group species difference analysis chart of Student’s t test at the species level, Pre-EA group and HC group (B). Group species difference analysis chart of Student’s t test at the species level, Post-EA group and HC group (C). Group species difference analysis chart of Student’s t test at the species level, Post-EA group and Pre-EA group (D).


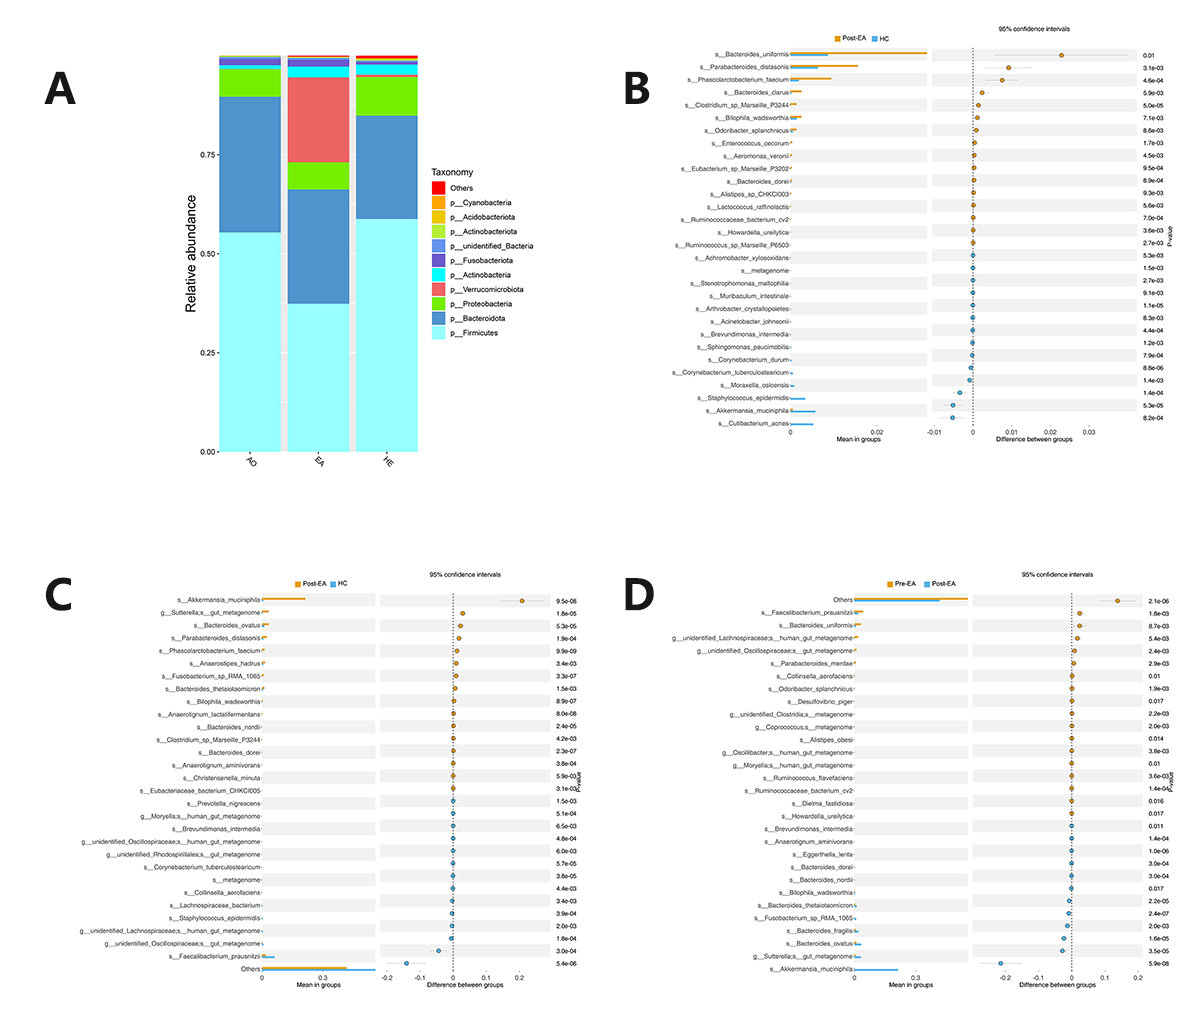


# Table S1

Table S1 Adverse of included patients

| Adverse Event | EA group (n=34) | | SA group(n=34) | | *P* Value |
| --- | --- | --- | --- | --- | --- |
| Participants, n (%) | Events, n | Participants, n (%) | Events, n |  |
| Overall | 3 (8.82) | 10 | 2(5.88) | 4 | 1.00 |
| Sleeplessness after treatment | 0(0) | 0 | 1(2.94) | 2 | 1.00 |
| Hematoma around the site of needling | 2 (5.88) | 8 | 0(0) | 0 | 0.493 |
| Sharp pain lasting＞0.5ha | 1 (2.94) | 2 | 0 (0) | 0 | 1.00 |
| Bleeding/numbness/infection around the site of needling | 0 (0) | 0 | 0 (0) | 0 | 1.00 |
| Other discomforts after treatmentb | 0 (0) | 0 | 1(2.94) | 2 | 1.00 |

Abbreviations: EA, electroacupuncture; SA, sham electroacupuncture

a Sharp pain was defined as VAS ≥4

b Include headache, local edema, transient weakness of the hand and mild pain.

# Table S2

| Table S2 Blinding assessments of included patients | | | | |
| --- | --- | --- | --- | --- |
| Patients’ answers | EA group(n=34) | SA group(n=34) | χ2 | *P* value |
| ‘EA’ (n, %) | 29(85.29) | 27(79.41) | 0.405 | 0.525 |
| ‘SA’ (n, %) | 5(14.71) | 7(20.59) |

EA = electroacupuncture. SA = sham electroacupuncture.

Five minutes after their last treatments of weeks 4, participants were asked if they had received the EA or SA treatment.

Supplement eTable2 showed the proportions of participants who guessed themselves receiving EA treatment in EA and SA groups, respectively.

The Chi-Square test suggested that the difference between the EA and SA in the percentages of the participants who guess they themselves receiving EA treatment was not significant.

# Table S3

Table S3 Adverse of included patients

| Adherence | EA group (n=34) | | SA group(n=34) | | *P* Value | |
| --- | --- | --- | --- | --- | --- | --- |
| Dietary | Physical exercise | Dietary | Physical exercise | Dietary | Physical exercise |
| Overall | 0.87 | 0.87 | 0.86 | 0.89 | 0.347 | 0.401 |
| Week 1 | 0.85 | 0.91 | 0.85 | 0.91 | 1.00 | 1.00 |
| Week 2 | 0.91 | 0.91 | 0.88 | 0.88 | 1.00 | 1.00 |
| Week 3 | 0.88 | 0.82 | 0.82 | 0.91 | 0.493 | 0.474 |
| Week 4 | 0.91 | 0.85 | 0.82 | 0.88 | 0.474 | 1.00 |
| Week 5 | 0.85 | 0.88 | 0.82 | 0.91 | 0.742 | 1.00 |
| Week 6 | 0.82 | 0.88 | 0.91 | 0.82 | 0.474 | 0.493 |
| Week 7 | 0.85 | 0.88 | 0.88 | 0.88 | 1.00 | 1.00 |
| Week 8 | 0.85 | 0.82 | 0.88 | 0.91 | 1.00 | 0.474 |

Abbreviations: EA, electroacupuncture; SA, sham electroacupuncture

# Table S4

| **Table S4 1607 lipid species detected in serum of HC group, pre-EA and post-EA group** | | | | | | |
| --- | --- | --- | --- | --- | --- | --- |
| **Compounds** | **Class I** | **Class II** | **Q1 (Da)** | **Molecular weight (Da)** | **Ionization model** | **Formula** |
| (±)12-HETE | FA | Eicosanoid | 319.22732 | 320.2351449 | [M-H]- | C20H32O3 |
| 15-oxoETE | FA | Eicosanoid | 317.211675 | 318.2194948 | [M-H]- | C20H30O3 |
| 6,7-diketolithocholic acid | ST | BA | 403.3 | 404.256287 | [M-H]- | C24H38O3 |
| 9,10-DiHOME | FA | Eicosanoid | 313.237875 | 314.2457 | [M-H]- | C18H34O4 |
| CE(14:0) | ST | CE | 614.59694 | 596.55323 | [M+NH4]+ | C41H72O2 |
| CE(15:0) | ST | CE | 628.603254 | 610.56888 | [M+NH4]+ | C42H74O2 |
| CE(16:1) | ST | CE | 640.61264 | 622.56888 | [M+NH4]+ | C43H74O2 |
| CE(17:1) | ST | CE | 654.618904 | 636.58453 | [M+NH4]+ | C44H76O2 |
| CE(17:2) | ST | CE | 652.59857 | 634.56888 | [M+NH4]+ | C44H74O2 |
| CE(18:0) | ST | CE | 670.65954 | 652.61583 | [M+NH4]+ | C45H80O2 |
| CE(18:1) | ST | CE | 668.64394 | 650.60018 | [M+NH4]+ | C45H78O2 |
| CE(18:2) | ST | CE | 666.62824 | 648.58453 | [M+NH4]+ | C45H76O2 |
| CE(18:3) | ST | CE | 664.61264 | 646.56888 | [M+NH4]+ | C45H74O2 |
| CE(18:4) | ST | CE | 662.58484 | 644.55323 | [M+NH4]+ | C45H72O2 |
| CE(19:0) | ST | CE | 684.6653 | 666.63148 | [M+NH4]+ | C46H82O2 |
| CE(19:1) | ST | CE | 682.7 | 664.61583 | [M+NH4]+ | C46H80O2 |
| CE(19:2) | ST | CE | 680.7 | 662.60018 | [M+NH4]+ | C46H78O2 |
| CE(20:0) | ST | CE | 698.69087 | 680.64713 | [M+NH4]+ | C47H84O2 |
| CE(20:1) | ST | CE | 696.67524 | 678.63148 | [M+NH4]+ | C47H82O2 |
| CE(20:2) | ST | CE | 694.657282 | 676.61583 | [M+NH4]+ | C47H80O2 |
| CE(20:3) | ST | CE | 692.64394 | 674.60018 | [M+NH4]+ | C47H78O2 |
| CE(20:4) | ST | CE | 690.58484 | 672.58453 | [M+NH4]+ | C47H76O2 |
| CE(20:5) | ST | CE | 688.61264 | 670.56888 | [M+NH4]+ | C47H74O2 |
| CE(22:0) | ST | CE | 726.72214 | 708.67843 | [M+NH4]+ | C49H88O2 |
| CE(22:1) | ST | CE | 724.70654 | 706.66278 | [M+NH4]+ | C49H86O2 |
| CE(22:2) | ST | CE | 722.681504 | 704.64713 | [M+NH4]+ | C49H84O2 |
| CE(22:3) | ST | CE | 720.67524 | 702.63148 | [M+NH4]+ | C49H82O2 |
| CE(22:4) | ST | CE | 718.65954 | 700.61583 | [M+NH4]+ | C49H80O2 |
| CE(22:5) | ST | CE | 716.64394 | 698.60018 | [M+NH4]+ | C49H78O2 |
| CE(22:6) | ST | CE | 714.62824 | 696.58453 | [M+NH4]+ | C49H76O2 |
| CE(24:0) | ST | CE | 754.744104 | 736.70973 | [M+NH4]+ | C51H92O2 |
| CE(24:1) | ST | CE | 752.728454 | 734.69408 | [M+NH4]+ | C51H90O2 |
| CE(24:4) | ST | CE | 746.7 | 740.64713 | [M+NH4]+ | C52H84O2 |
| CE(24:5) | ST | CE | 744.7 | 712.61583 | [M+NH4]+ | C50H80O2 |
| CE(26:4) | ST | CE | 774.712804 | 756.67843 | [M+NH4]+ | C53H88O2 |
| Carnitine C10:0 | FA | CAR | 316.2496915 | 315.240959 | [M+H]+ | C17H33NO4 |
| Carnitine C10:1 | FA | CAR | 314.2339865 | 313.225309 | [M+H]+ | C17H31NO4 |
| Carnitine C10:1-OH | FA | CAR | 330.2289015 | 329.220224 | [M+H]+ | C17H31NO5 |
| Carnitine C10:2 | FA | CAR | 312.2182815 | 311.209659 | [M+H]+ | C17H29NO4 |
| Carnitine C12-OH | FA | CAR | 360.2760165 | 359.267174 | [M+H]+ | C19H37NO5 |
| Carnitine C12:0 | FA | CAR | 344.2811015 | 343.272259 | [M+H]+ | C19H37NO4 |
| Carnitine C12:1 | FA | CAR | 342.2653965 | 341.256609 | [M+H]+ | C19H35NO4 |
| Carnitine C12:1-2OH | FA | CAR | 374.2552265 | 373.246439 | [M+H]+ | C19H35NO6 |
| Carnitine C12:1-OH | FA | CAR | 358.2603115 | 357.251524 | [M+H]+ | C19H35NO5 |
| Carnitine C13:0 | FA | CAR | 358.29544 | 357.287909 | [M+H]+ | C20H39NO4 |
| Carnitine C14-OH | FA | CAR | 388.3074265 | 387.298474 | [M+H]+ | C21H41NO5 |
| Carnitine C14:0 | FA | CAR | 372.3125115 | 371.303559 | [M+H]+ | C21H41NO4 |
| Carnitine C14:1 | FA | CAR | 370.2968065 | 369.287909 | [M+H]+ | C21H39NO4 |
| Carnitine C14:1-OH | FA | CAR | 386.2917215 | 385.282824 | [M+H]+ | C21H39NO5 |
| Carnitine C14:2 | FA | CAR | 368.2811015 | 367.272259 | [M+H]+ | C21H37NO4 |
| Carnitine C15:0 | FA | CAR | 386.32504 | 385.319209 | [M+H]+ | C22H43NO4 |
| Carnitine C15:1 | FA | CAR | 384.311384 | 383.303559 | [M+H]+ | C22H41NO4 |
| Carnitine C16-OH | FA | CAR | 416.3388365 | 415.329774 | [M+H]+ | C23H45NO5 |
| Carnitine C16:0 | FA | CAR | 400.3439215 | 399.334859 | [M+H]+ | C23H45NO4 |
| Carnitine C16:1 | FA | CAR | 398.3282165 | 397.319209 | [M+H]+ | C23H43NO4 |
| Carnitine C16:1-OH | FA | CAR | 414.321949 | 413.314124 | [M+H]+ | C23H43NO5 |
| Carnitine C16:2 | FA | CAR | 396.3125115 | 395.303559 | [M+H]+ | C23H41NO4 |
| Carnitine C16:3 | FA | CAR | 394.295734 | 393.287909 | [M+H]+ | C23H39NO4 |
| Carnitine C17:0 | FA | CAR | 414.358334 | 413.350509 | [M+H]+ | C24H47NO4 |
| Carnitine C18-OH | FA | CAR | 444.3702465 | 443.361074 | [M+H]+ | C25H49NO5 |
| Carnitine C18:0 | FA | CAR | 428.3753315 | 427.366159 | [M+H]+ | C25H49NO4 |
| Carnitine C18:1 | FA | CAR | 426.3596265 | 425.350509 | [M+H]+ | C25H47NO4 |
| Carnitine C18:1-OH | FA | CAR | 442.3545415 | 441.345424 | [M+H]+ | C25H47NO5 |
| Carnitine C18:2 | FA | CAR | 424.3439215 | 423.334859 | [M+H]+ | C25H45NO4 |
| Carnitine C18:2-OH | FA | CAR | 440.3388365 | 439.329774 | [M+H]+ | C25H45NO5 |
| Carnitine C18:3 | FA | CAR | 422.327034 | 421.319209 | [M+H]+ | C25H43NO4 |
| Carnitine C20:0 | FA | CAR | 456.40433 | 455.397459 | [M+H]+ | C27H53NO4 |
| Carnitine C20:2 | FA | CAR | 452.37354 | 451.366159 | [M+H]+ | C27H49NO4 |
| Carnitine C20:3 | FA | CAR | 450.358334 | 449.350509 | [M+H]+ | C27H47NO4 |
| Carnitine C20:4 | FA | CAR | 448.342684 | 447.334859 | [M+H]+ | C27H45NO4 |
| Carnitine C22:1 | FA | CAR | 482.41876 | 481.413109 | [M+H]+ | C29H55NO4 |
| Carnitine C24:0 | FA | CAR | 512.467884 | 511.460059 | [M+H]+ | C31H61NO4 |
| Carnitine C2:0 | FA | CAR | 204.1240515 | 203.115759 | [M+H]+ | C9H17NO4 |
| Carnitine C3:0 | FA | CAR | 218.1397565 | 217.131409 | [M+H]+ | C10H19NO4 |
| Carnitine C3:1-2OH | FA | CAR | 248.1134123 | 247.105589 | [M+H]+ | C10H17NO6 |
| Carnitine C4-OH | FA | CAR | 248.1503765 | 247.141974 | [M+H]+ | C11H21NO5 |
| Carnitine C4:0 | FA | CAR | 232.1554615 | 231.147059 | [M+H]+ | C11H21NO4 |
| Carnitine C4:1-2OH | FA | CAR | 262.1290623 | 261.121239 | [M+H]+ | C11H19NO6 |
| Carnitine C5-OH | FA | CAR | 262.1660815 | 261.157624 | [M+H]+ | C12H23NO5 |
| Carnitine C5:0 | FA | CAR | 246.1711665 | 245.162709 | [M+H]+ | C12H23NO4 |
| Carnitine C5:1 | FA | CAR | 244.1554615 | 243.147059 | [M+H]+ | C12H21NO4 |
| Carnitine C5:1-2OH | FA | CAR | 274.1295865 | 273.121239 | [M+H]+ | C12H19NO6 |
| Carnitine C6-2OH | FA | CAR | 290.1609965 | 289.152539 | [M+H]+ | C13H23NO6 |
| Carnitine C6-OH | FA | CAR | 276.1817865 | 275.173274 | [M+H]+ | C13H25NO5 |
| Carnitine C6:0 | FA | CAR | 260.1868715 | 259.178359 | [M+H]+ | C13H25NO4 |
| Carnitine C6:1 | FA | CAR | 258.1711665 | 257.162709 | [M+H]+ | C13H23NO4 |
| Carnitine C8:0 | FA | CAR | 288.2182815 | 287.209659 | [M+H]+ | C15H29NO4 |
| Carnitine C8:1 | FA | CAR | 286.2025765 | 285.194009 | [M+H]+ | C15H27NO4 |
| Carnitine C8:1-OH | FA | CAR | 302.1974915 | 301.188924 | [M+H]+ | C15H27NO5 |
| Carnitine C9:0 | FA | CAR | 302.233135 | 301.225309 | [M+H]+ | C16H31NO4 |
| Cer(d16:0/18:1) | SP | Cer-NDS | 520.508801 | 537.512095 | [M-H2O+H]+ | C34H67NO3 |
| Cer(d16:0/19:0) | SP | Cer-NDS | 536.5401012 | 553.5433952 | [M-H2O+H]+ | C35H71NO3 |
| Cer(d16:0/19:1) | SP | Cer-NDS | 534.5244511 | 551.5277451 | [M-H2O+H]+ | C35H69NO3 |
| Cer(d16:0/21:0) | SP | Cer-NDS | 564.5714013 | 581.5746953 | [M-H2O+H]+ | C37H75NO3 |
| Cer(d16:1/16:0) | SP | Cer-NS | 492.4775 | 509.480794 | [M-H2O+H]+ | C32H63NO3 |
| Cer(d16:1/18:0) | SP | Cer-NS | 520.5088 | 537.512094 | [M-H2O+H]+ | C34H67NO3 |
| Cer(d16:1/20:0) | SP | Cer-NS | 548.5401 | 565.543394 | [M-H2O+H]+ | C36H71NO3 |
| Cer(d16:1/22:0) | SP | Cer-NS | 576.5714 | 593.574694 | [M-H2O+H]+ | C38H75NO3 |
| Cer(d16:1/23:0) | SP | Cer-NS | 590.58705 | 607.590344 | [M-H2O+H]+ | C39H77NO3 |
| Cer(d16:1/24:0) | SP | Cer-NS | 604.6027 | 621.605994 | [M-H2O+H]+ | C40H79NO3 |
| Cer(d16:1/24:1) | SP | Cer-NS | 602.58705 | 619.590344 | [M-H2O+H]+ | C40H77NO3 |
| Cer(d17:1/16:0) | SP | Cer-NS | 506.493151 | 523.496445 | [M-H2O+H]+ | C33H65NO3 |
| Cer(d17:1/18:0) | SP | Cer-NS | 534.5244511 | 551.5277451 | [M-H2O+H]+ | C35H69NO3 |
| Cer(d17:1/20:0) | SP | Cer-NS | 562.5557512 | 579.5590452 | [M-H2O+H]+ | C37H73NO3 |
| Cer(d17:1/22:0) | SP | Cer-NS | 590.5870513 | 607.5903453 | [M-H2O+H]+ | C39H77NO3 |
| Cer(d17:1/23:1) | SP | Cer-NS | 602.5870513 | 619.5903453 | [M-H2O+H]+ | C40H77NO3 |
| Cer(d17:1/24:0) | SP | Cer-NS | 618.6183515 | 635.6216455 | [M-H2O+H]+ | C41H81NO3 |
| Cer(d17:1/24:1) | SP | Cer-NS | 616.6027014 | 633.6059954 | [M-H2O+H]+ | C41H79NO3 |
| Cer(d17:1/25:1) | SP | Cer-NS | 630.6183515 | 647.6216455 | [M-H2O+H]+ | C42H81NO3 |
| Cer(d17:1/26:0) | SP | Cer-NS | 646.6496516 | 663.6529456 | [M-H2O+H]+ | C43H85NO3 |
| Cer(d18:0/18:0) | SP | Cer-NDS | 550.55575 | 567.559044 | [M-H2O+H]+ | C36H73NO3 |
| Cer(d18:0/19:1) | SP | Cer-NDS | 562.5557512 | 579.5590452 | [M-H2O+H]+ | C37H73NO3 |
| Cer(d18:0/22:0) | SP | Cer-NDS | 606.61835 | 623.621644 | [M-H2O+H]+ | C40H81NO3 |
| Cer(d18:0/22:1(2OH)) | SP | Cer-ADS | 620.597615 | 637.600909 | [M-H2O+H]+ | C40H79NO4 |
| Cer(d18:0/23:0) | SP | Cer-NDS | 620.6340015 | 637.6372955 | [M-H2O+H]+ | C41H83NO3 |
| Cer(d18:0/24:0) | SP | Cer-NDS | 634.64965 | 651.652944 | [M-H2O+H]+ | C42H85NO3 |
| Cer(d18:0/24:1) | SP | Cer-NDS | 632.634 | 649.637294 | [M-H2O+H]+ | C42H83NO3 |
| Cer(d18:1/15:1(2OH)) | SP | Cer-AS | 520.4724155 | 537.4757095 | [M-H2O+H]+ | C33H63NO4 |
| Cer(d18:1/16:0) | SP | Cer-NS | 520.5088 | 537.512094 | [M-H2O+H]+ | C34H67NO3 |
| Cer(d18:1/16:1) | SP | Cer-NS | 518.49315 | 535.496444 | [M-H2O+H]+ | C34H65NO3 |
| Cer(d18:1/17:0) | SP | Cer-NS | 534.52445 | 551.527744 | [M-H2O+H]+ | C35H69NO3 |
| Cer(d18:1/18:0) | SP | Cer-NS | 548.5401 | 565.543394 | [M-H2O+H]+ | C36H71NO3 |
| Cer(d18:1/20:0) | SP | Cer-NS | 576.5714 | 593.574694 | [M-H2O+H]+ | C38H75NO3 |
| Cer(d18:1/21:0(2OH)) | SP | Cer-AS | 606.581966 | 623.58526 | [M-H2O+H]+ | C39H77NO4 |
| Cer(d18:1/21:0) | SP | Cer-NS | 590.58705 | 607.590344 | [M-H2O+H]+ | C39H77NO3 |
| Cer(d18:1/21:1(2OH)) | SP | Cer-AS | 604.5663159 | 621.5696099 | [M-H2O+H]+ | C39H75NO4 |
| Cer(d18:1/22:0(2OH)) | SP | Cer-AS | 638.608186 | 637.60091 | [M+H]+ | C40H79NO4 |
| Cer(d18:1/22:0) | SP | Cer-NS | 604.6027 | 621.605994 | [M-H2O+H]+ | C40H79NO3 |
| Cer(d18:1/22:2) | SP | Cer-NS | 600.5714013 | 617.5746953 | [M-H2O+H]+ | C40H75NO3 |
| Cer(d18:1/23:0) | SP | Cer-NS | 618.61835 | 635.621644 | [M-H2O+H]+ | C41H81NO3 |
| Cer(d18:1/23:1) | SP | Cer-NS | 616.6027014 | 633.6059954 | [M-H2O+H]+ | C41H79NO3 |
| Cer(d18:1/24:0(2OH)) | SP | Cer-AS | 666.6394862 | 665.6322102 | [M+H]+ | C42H83NO4 |
| Cer(d18:1/24:0) | SP | Cer-NS | 632.634 | 649.637294 | [M-H2O+H]+ | C42H83NO3 |
| Cer(d18:1/24:1) | SP | Cer-NS | 630.61835 | 647.621644 | [M-H2O+H]+ | C42H81NO3 |
| Cer(d18:1/24:2) | SP | Cer-NS | 628.6027014 | 645.6059954 | [M-H2O+H]+ | C42H79NO3 |
| Cer(d18:1/25:0) | SP | Cer-NS | 646.64965 | 663.652944 | [M-H2O+H]+ | C43H85NO3 |
| Cer(d18:1/25:1) | SP | Cer-NS | 644.6340015 | 661.6372955 | [M-H2O+H]+ | C43H83NO3 |
| Cer(d18:1/26:0) | SP | Cer-NS | 660.6653 | 677.668594 | [M-H2O+H]+ | C44H87NO3 |
| Cer(d18:1/26:1) | SP | Cer-NS | 658.64965 | 675.652944 | [M-H2O+H]+ | C44H85NO3 |
| Cer(d18:1/26:2) | SP | Cer-NS | 656.6340015 | 673.6372955 | [M-H2O+H]+ | C44H83NO3 |
| Cer(d18:1/40:0(2OH)) | SP | Cer-AS | 872.8793172 | 889.8826112 | [M-H2O+H]+ | C58H115NO4 |
| Cer(d18:1/40:2(2OH)) | SP | Cer-AS | 868.8480171 | 885.8513111 | [M-H2O+H]+ | C58H111NO4 |
| Cer(d18:1/42:1(2OH)) | SP | Cer-AS | 898.8949673 | 915.8982613 | [M-H2O+H]+ | C60H117NO4 |
| Cer(d18:1/42:2(2OH)) | SP | Cer-AS | 896.8793172 | 913.8826112 | [M-H2O+H]+ | C60H115NO4 |
| Cer(d18:2/16:0) | SP | Cer-NS | 518.49315 | 535.496444 | [M-H2O+H]+ | C34H65NO3 |
| Cer(d18:2/18:0) | SP | Cer-NS | 546.52445 | 563.527744 | [M-H2O+H]+ | C36H69NO3 |
| Cer(d18:2/20:0) | SP | Cer-NS | 574.55575 | 591.559044 | [M-H2O+H]+ | C38H73NO3 |
| Cer(d18:2/21:0) | SP | Cer-NS | 588.5714 | 605.574694 | [M-H2O+H]+ | C39H75NO3 |
| Cer(d18:2/21:1(2OH)) | SP | Cer-AS | 602.5506658 | 619.5539598 | [M-H2O+H]+ | C39H73NO4 |
| Cer(d18:2/22:0(2OH)) | SP | Cer-AS | 618.581966 | 635.58526 | [M-H2O+H]+ | C40H77NO4 |
| Cer(d18:2/22:0) | SP | Cer-NS | 602.58705 | 619.590344 | [M-H2O+H]+ | C40H77NO3 |
| Cer(d18:2/23:0) | SP | Cer-NS | 616.6027 | 633.605994 | [M-H2O+H]+ | C41H79NO3 |
| Cer(d18:2/24:0(2OH)) | SP | Cer-AS | 646.6132661 | 663.6165601 | [M-H2O+H]+ | C42H81NO4 |
| Cer(d18:2/24:0) | SP | Cer-NS | 630.61835 | 647.621644 | [M-H2O+H]+ | C42H81NO3 |
| Cer(d18:2/24:1) | SP | Cer-NS | 628.6027 | 645.605994 | [M-H2O+H]+ | C42H79NO3 |
| Cer(d18:2/24:2) | SP | Cer-NS | 626.5870513 | 643.5903453 | [M-H2O+H]+ | C42H77NO3 |
| Cer(d18:2/25:0) | SP | Cer-NS | 644.6340015 | 661.6372955 | [M-H2O+H]+ | C43H83NO3 |
| Cer(d18:2/25:1) | SP | Cer-NS | 642.6183515 | 659.6216455 | [M-H2O+H]+ | C43H81NO3 |
| Cer(d18:2/26:0) | SP | Cer-NS | 658.64965 | 675.652944 | [M-H2O+H]+ | C44H85NO3 |
| Cer(d18:2/40:1(2OH)) | SP | Cer-AS | 868.8480171 | 885.8513111 | [M-H2O+H]+ | C58H111NO4 |
| Cer(d18:2/40:2(2OH)) | SP | Cer-AS | 866.832367 | 883.835661 | [M-H2O+H]+ | C58H109NO4 |
| Cer(d18:2/42:2(2OH)) | SP | Cer-AS | 894.8636671 | 911.8669611 | [M-H2O+H]+ | C60H113NO4 |
| Cer(d19:1/22:0) | SP | Cer-NS | 618.6183515 | 635.6216455 | [M-H2O+H]+ | C41H81NO3 |
| Cer(d19:1/23:0) | SP | Cer-NS | 632.6340015 | 649.6372955 | [M-H2O+H]+ | C42H83NO3 |
| Cer(d19:1/24:1) | SP | Cer-NS | 644.6340015 | 661.6372955 | [M-H2O+H]+ | C43H83NO3 |
| Cer(d19:1/25:0) | SP | Cer-NS | 660.6653017 | 677.6685957 | [M-H2O+H]+ | C44H87NO3 |
| Cer(d20:1/24:0(2OH)) | SP | Cer-AS | 676.6602163 | 693.6635103 | [M-H2O+H]+ | C44H87NO4 |
| Cer(d20:1/24:1) | SP | Cer-NS | 658.6496516 | 675.6529456 | [M-H2O+H]+ | C44H85NO3 |
| Cer(d21:2/36:0(2OH)) | SP | Cer-AS | 856.8480171 | 873.8513111 | [M-H2O+H]+ | C57H111NO4 |
| Cer(d21:2/38:2(2OH)) | SP | Cer-AS | 880.8480171 | 897.8513111 | [M-H2O+H]+ | C59H111NO4 |
| Cer(d21:3/16:0) | SP | Cer-NS | 558.5244511 | 575.5277451 | [M-H2O+H]+ | C37H69NO3 |
| Cer(d21:3/38:2(2OH)) | SP | Cer-AS | 878.832367 | 895.835661 | [M-H2O+H]+ | C59H109NO4 |
| Cer(d22:2/35:1(2OH)) | SP | Cer-AS | 854.832367 | 871.835661 | [M-H2O+H]+ | C57H109NO4 |
| Cer(d23:0/18:0) | SP | Cer-NDS | 620.6340015 | 637.6372955 | [M-H2O+H]+ | C41H83NO3 |
| Cer(d23:2/34:0(2OH)) | SP | Cer-AS | 856.8480171 | 873.8513111 | [M-H2O+H]+ | C57H111NO4 |
| Cer(d24:0/18:0) | SP | Cer-NDS | 634.6496516 | 651.6529456 | [M-H2O+H]+ | C42H85NO3 |
| Cer(d24:0/18:1) | SP | Cer-NDS | 632.6340015 | 649.6372955 | [M-H2O+H]+ | C42H83NO3 |
| Cer(d24:1/18:0(2OH)) | SP | Cer-AS | 648.6289162 | 665.6322102 | [M-H2O+H]+ | C42H83NO4 |
| Cer(d24:2/33:0(2OH)) | SP | Cer-AS | 856.8480171 | 873.8513111 | [M-H2O+H]+ | C57H111NO4 |
| Cer(d24:2/35:1(2OH)) | SP | Cer-AS | 882.8636671 | 899.8669611 | [M-H2O+H]+ | C59H113NO4 |
| Cer(d24:3/15:1(2OH)) | SP | Cer-AS | 600.5350158 | 617.5383098 | [M-H2O+H]+ | C39H71NO4 |
| Cer(d25:2/32:0(2OH)) | SP | Cer-AS | 856.8480171 | 873.8513111 | [M-H2O+H]+ | C57H111NO4 |
| Cer(d25:2/34:1(2OH)) | SP | Cer-AS | 882.8636671 | 899.8669611 | [M-H2O+H]+ | C59H113NO4 |
| Cer(d26:1/31:1(2OH)) | SP | Cer-AS | 856.8480171 | 873.8513111 | [M-H2O+H]+ | C57H111NO4 |
| Cer(d26:2/31:0(2OH)) | SP | Cer-AS | 856.8480171 | 873.8513111 | [M-H2O+H]+ | C57H111NO4 |
| Cer(d27:1/30:1(2OH)) | SP | Cer-AS | 856.8480171 | 873.8513111 | [M-H2O+H]+ | C57H111NO4 |
| Cer(d27:2/30:0(2OH)) | SP | Cer-AS | 856.8480171 | 873.8513111 | [M-H2O+H]+ | C57H111NO4 |
| Cer(d28:2/29:0(2OH)) | SP | Cer-AS | 856.8480171 | 873.8513111 | [M-H2O+H]+ | C57H111NO4 |
| Cer(d29:1/28:1(2OH)) | SP | Cer-AS | 856.8480171 | 873.8513111 | [M-H2O+H]+ | C57H111NO4 |
| Cer(d29:1/30:2(2OH)) | SP | Cer-AS | 882.8636671 | 899.8669611 | [M-H2O+H]+ | C59H113NO4 |
| Cer(d29:2/28:0(2OH)) | SP | Cer-AS | 856.8480171 | 873.8513111 | [M-H2O+H]+ | C57H111NO4 |
| Cer(t14:1/24:1(2OH)) | SP | Cer-AP | 606.5455805 | 623.5488745 | [M-H2O+H]+ | C38H73NO5 |
| Cer(t16:1/25:0) | SP | Cer-NP | 634.6132661 | 651.6165601 | [M-H2O+H]+ | C41H81NO4 |
| Cer(t16:1/26:0) | SP | Cer-NP | 648.6289162 | 665.6322102 | [M-H2O+H]+ | C42H83NO4 |
| Cer(t16:2/22:0(2OH)) | SP | Cer-AP | 606.5455805 | 623.5488745 | [M-H2O+H]+ | C38H73NO5 |
| Cer(t17:1/26:0) | SP | Cer-NP | 662.6445662 | 679.6478602 | [M-H2O+H]+ | C43H85NO4 |
| Cer(t17:2/16:0) | SP | Cer-NP | 520.4724155 | 537.4757095 | [M-H2O+H]+ | C33H63NO4 |
| Cer(t17:2/16:1) | SP | Cer-NP | 518.4567654 | 535.4600594 | [M-H2O+H]+ | C33H61NO4 |
| Cer(t17:2/18:0) | SP | Cer-NP | 548.5037156 | 565.5070096 | [M-H2O+H]+ | C35H67NO4 |
| Cer(t17:2/22:0) | SP | Cer-NP | 604.5663159 | 621.5696099 | [M-H2O+H]+ | C39H75NO4 |
| Cer(t17:2/22:1) | SP | Cer-NP | 602.5506658 | 619.5539598 | [M-H2O+H]+ | C39H73NO4 |
| Cer(t17:2/24:1) | SP | Cer-NP | 630.581966 | 647.58526 | [M-H2O+H]+ | C41H77NO4 |
| Cer(t17:2/25:0) | SP | Cer-NP | 646.6132661 | 663.6165601 | [M-H2O+H]+ | C42H81NO4 |
| Cer(t17:2/35:1) | SP | Cer-NP | 784.7541167 | 801.7574107 | [M-H2O+H]+ | C52H99NO4 |
| Cer(t18:0/18:0) | SP | Cer-NP | 566.550665 | 583.553959 | [M-H2O+H]+ | C36H73NO4 |
| Cer(t18:0/20:0(2OH)) | SP | Cer-AP | 610.57688 | 627.580174 | [M-H2O+H]+ | C38H77NO5 |
| Cer(t18:0/22:0) | SP | Cer-NP | 640.623835 | 639.616559 | [M+H]+ | C40H81NO4 |
| Cer(t18:0/23:1) | SP | Cer-NP | 634.6132661 | 651.6165601 | [M-H2O+H]+ | C41H81NO4 |
| Cer(t18:0/24:0) | SP | Cer-NP | 668.655135 | 667.647859 | [M+H]+ | C42H85NO4 |
| Cer(t18:0/24:1) | SP | Cer-NP | 666.639485 | 665.632209 | [M+H]+ | C42H83NO4 |
| Cer(t18:1/15:1) | SP | Cer-NP | 520.4724155 | 537.4757095 | [M-H2O+H]+ | C33H63NO4 |
| Cer(t18:1/20:1(2OH)) | SP | Cer-AP | 606.5455805 | 623.5488745 | [M-H2O+H]+ | C38H73NO5 |
| Cer(t18:1/38:2(2OH)) | SP | Cer-AP | 856.8116315 | 873.8149255 | [M-H2O+H]+ | C56H107NO5 |
| Cer(t18:2/38:2(2OH)) | SP | Cer-AP | 854.7959815 | 871.7992755 | [M-H2O+H]+ | C56H105NO5 |
| Cer(t20:1/36:2(2OH)) | SP | Cer-AP | 856.8116315 | 873.8149255 | [M-H2O+H]+ | C56H107NO5 |
| Cer(t20:1/38:2(2OH)) | SP | Cer-AP | 884.8429317 | 901.8462257 | [M-H2O+H]+ | C58H111NO5 |
| Cer(t20:2/18:0(2OH)) | SP | Cer-AP | 606.5455805 | 623.5488745 | [M-H2O+H]+ | C38H73NO5 |
| Cer(t20:2/38:2(2OH)) | SP | Cer-AP | 882.8272816 | 899.8305756 | [M-H2O+H]+ | C58H109NO5 |
| Cer(t20:2/40:2(2OH)) | SP | Cer-AP | 910.8585817 | 927.8618757 | [M-H2O+H]+ | C60H113NO5 |
| Cer(t21:1/18:0) | SP | Cer-NP | 606.581966 | 623.58526 | [M-H2O+H]+ | C39H77NO4 |
| Cer(t22:1/34:2(2OH)) | SP | Cer-AP | 856.8116315 | 873.8149255 | [M-H2O+H]+ | C56H107NO5 |
| Cer(t22:2/38:2(2OH)) | SP | Cer-AP | 910.8585817 | 927.8618757 | [M-H2O+H]+ | C60H113NO5 |
| Cer(t24:0/18:1) | SP | Cer-NP | 648.6289162 | 665.6322102 | [M-H2O+H]+ | C42H83NO4 |
| Cer(t26:1/12:1(2OH)) | SP | Cer-AP | 606.5455805 | 623.5488745 | [M-H2O+H]+ | C38H73NO5 |
| Cer(t30:0/18:1(2OH)) | SP | Cer-AP | 748.7177312 | 765.7210252 | [M-H2O+H]+ | C48H95NO5 |
| CerP(d18:1/14:0) | SP | CerP | 588.439302 | 589.447126 | [M-H]- | C32H64NO6P |
| CerP(d18:1/16:0) | SP | CerP | 616.470602 | 617.478426 | [M-H]- | C34H68NO6P |
| CerP(d18:1/16:1) | SP | CerP | 614.454975 | 615.462776 | [M-H]- | C34H66NO6P |
| CerP(d18:1/18:1) | SP | CerP | 642.486275 | 643.494076 | [M-H]- | C36H70NO6P |
| CerP(d18:1/18:2) | SP | CerP | 640.470575 | 641.478426 | [M-H]- | C36H68NO6P |
| CerP(d18:1/24:0) | SP | CerP | 728.595802 | 729.603626 | [M-H]- | C42H84NO6P |
| Chenodeoxycholic acid | ST | BA | 391.5 | 392.292664 | [M-H]- | C24H40O4 |
| Cholesterol | ST | Cho | 369.4 | 386.354865 | [M-H2O+H]+ | C27H46O |
| Coenzyme Q10 | PR | CoQ | 863.69147 | 862.68391 | [M+H]+ | C59H90O4 |
| Coenzyme Q9 | PR | CoQ | 795.62878 | 794.62131 | [M+H]+ | C54H82O4 |
| DG(12:0_20:0) | GL | DG | 586.550416 | 568.506675 | [M+NH4]+ | C35H68O5 |
| DG(14:0_16:0) | GL | DG | 558.519116 | 540.475375 | [M+NH4]+ | C33H64O5 |
| DG(14:0_16:1) | GL | DG | 556.503466 | 538.459725 | [M+NH4]+ | C33H62O5 |
| DG(14:0_18:0) | GL | DG | 586.550416 | 568.506675 | [M+NH4]+ | C35H68O5 |
| DG(14:0_18:1) | GL | DG | 584.534766 | 566.491025 | [M+NH4]+ | C35H66O5 |
| DG(14:0_18:2) | GL | DG | 582.519116 | 564.475375 | [M+NH4]+ | C35H64O5 |
| DG(14:0_20:0) | GL | DG | 614.581716 | 596.537975 | [M+NH4]+ | C37H72O5 |
| DG(14:0_22:0) | GL | DG | 642.613016 | 624.569275 | [M+NH4]+ | C39H76O5 |
| DG(14:1_22:2) | GL | DG | 636.566066 | 618.522325 | [M+NH4]+ | C39H70O5 |
| DG(16:0_16:0) | GL | DG | 586.550416 | 568.506675 | [M+NH4]+ | C35H68O5 |
| DG(16:0_16:1) | GL | DG | 584.534766 | 566.491025 | [M+NH4]+ | C35H66O5 |
| DG(16:0_18:0) | GL | DG | 614.581716 | 596.537975 | [M+NH4]+ | C37H72O5 |
| DG(16:0_18:1) | GL | DG | 612.566066 | 594.522325 | [M+NH4]+ | C37H70O5 |
| DG(16:0_18:2) | GL | DG | 610.550416 | 592.506675 | [M+NH4]+ | C37H68O5 |
| DG(16:0_18:3) | GL | DG | 608.534766 | 590.491025 | [M+NH4]+ | C37H66O5 |
| DG(16:0_20:0) | GL | DG | 642.613016 | 624.569275 | [M+NH4]+ | C39H76O5 |
| DG(16:0_20:2) | GL | DG | 638.581716 | 620.537975 | [M+NH4]+ | C39H72O5 |
| DG(16:0_20:4) | GL | DG | 634.550416 | 616.506675 | [M+NH4]+ | C39H68O5 |
| DG(16:0_20:5) | GL | DG | 632.5191 | 614.491025 | [M+NH4]+ | C39H66O5 |
| DG(16:0_22:5) | GL | DG | 660.55707 | 642.522325 | [M+NH4]+ | C41H70O5 |
| DG(16:0_22:6) | GL | DG | 658.550416 | 640.506675 | [M+NH4]+ | C41H68O5 |
| DG(16:1_18:0) | GL | DG | 612.566066 | 594.522325 | [M+NH4]+ | C37H70O5 |
| DG(16:1_18:1) | GL | DG | 610.550416 | 592.506675 | [M+NH4]+ | C37H68O5 |
| DG(16:1_18:2) | GL | DG | 608.534766 | 590.491025 | [M+NH4]+ | C37H66O5 |
| DG(16:1_18:3) | GL | DG | 606.519116 | 588.475375 | [M+NH4]+ | C37H64O5 |
| DG(16:1_20:2) | GL | DG | 636.566066 | 618.522325 | [M+NH4]+ | C39H70O5 |
| DG(16:1_20:3) | GL | DG | 634.54065 | 616.506675 | [M+NH4]+ | C39H68O5 |
| DG(16:1_20:4) | GL | DG | 632.534766 | 614.491025 | [M+NH4]+ | C39H66O5 |
| DG(16:1_22:6) | GL | DG | 656.51984 | 638.491025 | [M+NH4]+ | C41H66O5 |
| DG(17:0_16:0) | GL | DG | 600.55444 | 582.522325 | [M+NH4]+ | C36H70O5 |
| DG(17:0_18:0) | GL | DG | 628.58545 | 610.553625 | [M+NH4]+ | C38H74O5 |
| DG(17:0_18:2) | GL | DG | 624.556699 | 606.522325 | [M+NH4]+ | C38H70O5 |
| DG(17:1_18:1) | GL | DG | 624.55499 | 606.522325 | [M+NH4]+ | C38H70O5 |
| DG(17:1_18:2) | GL | DG | 622.54419 | 604.506675 | [M+NH4]+ | C38H68O5 |
| DG(18:0_18:0) | GL | DG | 642.613016 | 624.569275 | [M+NH4]+ | C39H76O5 |
| DG(18:0_18:1) | GL | DG | 640.597366 | 622.553625 | [M+NH4]+ | C39H74O5 |
| DG(18:0_18:2) | GL | DG | 638.581716 | 620.537975 | [M+NH4]+ | C39H72O5 |
| DG(18:0_20:4) | GL | DG | 662.581716 | 644.537975 | [M+NH4]+ | C41H72O5 |
| DG(18:0_22:6) | GL | DG | 686.56982 | 668.537975 | [M+NH4]+ | C43H72O5 |
| DG(18:1_18:1) | GL | DG | 638.581716 | 620.537975 | [M+NH4]+ | C39H72O5 |
| DG(18:1_18:2) | GL | DG | 636.566066 | 618.522325 | [M+NH4]+ | C39H70O5 |
| DG(18:1_20:1) | GL | DG | 666.613016 | 648.569275 | [M+NH4]+ | C41H76O5 |
| DG(18:1_20:2) | GL | DG | 664.597366 | 646.553625 | [M+NH4]+ | C41H74O5 |
| DG(18:1_20:3) | GL | DG | 662.581716 | 644.537975 | [M+NH4]+ | C41H72O5 |
| DG(18:1_20:4) | GL | DG | 660.566066 | 642.522325 | [M+NH4]+ | C41H70O5 |
| DG(18:1_20:5) | GL | DG | 658.550416 | 640.506675 | [M+NH4]+ | C41H68O5 |
| DG(18:1_22:4) | GL | DG | 688.597366 | 670.553625 | [M+NH4]+ | C43H74O5 |
| DG(18:1_22:6) | GL | DG | 684.560826 | 666.522325 | [M+NH4]+ | C43H70O5 |
| DG(18:2_18:2) | GL | DG | 634.550416 | 616.506675 | [M+NH4]+ | C39H68O5 |
| DG(18:2_18:3) | GL | DG | 632.534766 | 614.491025 | [M+NH4]+ | C39H66O5 |
| DG(18:2_20:1) | GL | DG | 664.597366 | 646.553625 | [M+NH4]+ | C41H74O5 |
| DG(18:2_20:2) | GL | DG | 662.572349 | 644.537975 | [M+NH4]+ | C41H72O5 |
| DG(18:2_20:3) | GL | DG | 660.566066 | 642.522325 | [M+NH4]+ | C41H70O5 |
| DG(18:2_20:4) | GL | DG | 658.550416 | 640.506675 | [M+NH4]+ | C41H68O5 |
| DG(18:2_22:4) | GL | DG | 686.581716 | 668.537975 | [M+NH4]+ | C43H72O5 |
| DG(18:2_22:5) | GL | DG | 684.55084 | 666.522325 | [M+NH4]+ | C43H70O5 |
| DG(18:2_22:6) | GL | DG | 682.53937 | 664.506675 | [M+NH4]+ | C43H68O5 |
| DG(20:0_18:0) | GL | DG | 670.639076 | 652.600575 | [M+NH4]+ | C41H80O5 |
| DG(8:0_16:0) | GL | DG | 474.41071 | 456.381475 | [M+NH4]+ | C27H52O5 |
| DG(O-16:1_16:0) | GL | DG-O | 570.546134 | 552.51176 | [M+NH4]+ | C35H68O4 |
| DG(O-19:0_16:0) | GL | DG-O | 614.608734 | 596.57436 | [M+NH4]+ | C38H76O4 |
| DG(O-19:1_22:1) | GL | DG-O | 694.671334 | 676.63696 | [M+NH4]+ | C44H84O4 |
| DG(O-21:0_16:0) | GL | DG-O | 642.640034 | 624.60566 | [M+NH4]+ | C40H80O4 |
| DL-Carnitine | FA | CAR | 162.1134315 | 161.105194 | [M+H]+ | C7H15NO3 |
| FFA(10:0) | FA | FFA | 171.138505 | 172.14633 | [M-H]- | C10H20O2 |
| FFA(14:0) | FA | FFA | 227.201105 | 228.20893 | [M-H]- | C14H28O2 |
| FFA(15:0) | FA | FFA | 241.216755 | 242.22458 | [M-H]- | C15H30O2 |
| FFA(16:0) | FA | FFA | 255.232405 | 256.24023 | [M-H]- | C16H32O2 |
| FFA(16:1) | FA | FFA | 253.216755 | 254.22458 | [M-H]- | C16H30O2 |
| FFA(17:0) | FA | FFA | 269.248055 | 270.25588 | [M-H]- | C17H34O2 |
| FFA(17:1) | FA | FFA | 267.232405 | 268.24023 | [M-H]- | C17H32O2 |
| FFA(18:0) | FA | FFA | 283.263705 | 284.27153 | [M-H]- | C18H36O2 |
| FFA(18:1) | FA | FFA | 281.248055 | 282.25588 | [M-H]- | C18H34O2 |
| FFA(18:2) | FA | FFA | 279.232405 | 280.24023 | [M-H]- | C18H32O2 |
| FFA(18:3) | FA | FFA | 277.216755 | 278.22458 | [M-H]- | C18H30O2 |
| FFA(19:0) | FA | FFA | 297.279355 | 298.28718 | [M-H]- | C19H38O2 |
| FFA(20:1) | FA | FFA | 309.279355 | 310.28718 | [M-H]- | C20H38O2 |
| FFA(20:2) | FA | FFA | 307.263705 | 308.27153 | [M-H]- | C20H36O2 |
| FFA(20:3) | FA | FFA | 305.248055 | 306.25588 | [M-H]- | C20H34O2 |
| FFA(20:4) | FA | FFA | 303.232405 | 304.24023 | [M-H]- | C20H32O2 |
| FFA(20:5) | FA | FFA | 301.216754 | 302.22 | [M-H]- | C20H30O2 |
| FFA(22:0) | FA | FFA | 339.326305 | 340.33413 | [M-H]- | C22H44O2 |
| FFA(22:1) | FA | FFA | 337.310655 | 338.31848 | [M-H]- | C22H42O2 |
| FFA(22:2) | FA | FFA | 335.295005 | 336.30283 | [M-H]- | C22H40O2 |
| FFA(22:3) | FA | FFA | 333.279355 | 334.28718 | [M-H]- | C22H38O2 |
| FFA(22:4) | FA | FFA | 331.263705 | 332.27153 | [M-H]- | C22H36O2 |
| FFA(22:5) | FA | FFA | 329.248055 | 330.25588 | [M-H]- | C22H34O2 |
| FFA(22:6) | FA | FFA | 327.232409 | 328.2402 | [M-H]- | C22H32O2 |
| FFA(23:0) | FA | FFA | 353.341955 | 354.34978 | [M-H]- | C23H46O2 |
| FFA(24:4) | FA | FFA | 359.295005 | 360.30283 | [M-H]- | C24H40O2 |
| FFA(27:0) | FA | FFA | 409.404555 | 410.41238 | [M-H]- | C27H54O2 |
| FFA(28:0) | FA | FFA | 423.420205 | 424.42803 | [M-H]- | C28H56O2 |
| FFA(29:0) | FA | FFA | 437.435855 | 438.44368 | [M-H]- | C29H58O2 |
| FFA(30:0) | FA | FFA | 451.451505 | 452.45933 | [M-H]- | C30H60O2 |
| FFA(31:0) | FA | FFA | 465.467155 | 466.47498 | [M-H]- | C31H62O2 |
| FFA(32:1) | FA | FFA | 477.467155 | 478.47498 | [M-H]- | C32H62O2 |
| FFA(34:1) | FA | FFA | 505.498455 | 506.50628 | [M-H]- | C34H66O2 |
| FFA(34:6) | FA | FFA | 495.420205 | 496.42803 | [M-H]- | C34H56O2 |
| FFA(36:0) | FA | FFA | 535.545405 | 536.55323 | [M-H]- | C36H72O2 |
| FFA(38:1) | FA | FFA | 561.561055 | 562.56888 | [M-H]- | C38H74O2 |
| Glycochenodeoxycholic acid | ST | BA | 448.5 | 449.314117 | [M-H]- | C26H43NO5 |
| Glycocholic acid | ST | BA | 464.4 | 465.309052 | [M-H]- | C26H43NO6 |
| Glycoursodeoxycholic acid | ST | BA | 448.5 | 449.314117 | [M-H]- | C24H38O3 |
| Hex2Cer(d16:1/16:0) | SP | Hex2Cer | 844.61445 | 861.617744 | [M-H2O+H]+ | C44H83NO13 |
| Hex2Cer(d18:1/16:0) | SP | Hex2Cer | 844.61445 | 861.617744 | [M-H2O+H]+ | C46H87NO13 |
| Hex2Cer(d18:1/18:0) | SP | Hex2Cer | 872.64575 | 889.649044 | [M-H2O+H]+ | C48H91NO13 |
| Hex2Cer(d18:1/20:0) | SP | Hex2Cer | 900.67705 | 917.680344 | [M-H2O+H]+ | C50H95NO13 |
| Hex2Cer(d18:1/24:0) | SP | Hex2Cer | 956.73965 | 973.742944 | [M-H2O+H]+ | C54H103NO13 |
| Hex2Cer(d18:2/16:0) | SP | Hex2Cer | 842.5988 | 859.602094 | [M-H2O+H]+ | C46H85NO13 |
| Hex3Cer(d18:1/16:0) | SP | Hex3Cer | 1006.667275 | 1023.670569 | [M-H2O+H]+ | C52H97NO18 |
| Hex3Cer(d18:1/18:0) | SP | Hex3Cer | 1034.698575 | 1051.701869 | [M-H2O+H]+ | C54H101NO18 |
| Hex3Cer(d18:1/20:0) | SP | Hex3Cer | 1062.729875 | 1079.733169 | [M-H2O+H]+ | C56H105NO18 |
| Hex3Cer(d18:1/24:0) | SP | Hex3Cer | 1118.792475 | 1135.795769 | [M-H2O+H]+ | C60H113NO18 |
| Hex3Cer(d18:1/24:1) | SP | Hex3Cer | 1116.776825 | 1133.780119 | [M-H2O+H]+ | C60H111NO18 |
| HexCer(d16:1/20:0) | SP | HexCer-NS | 548.540636 | 727.596219 | [M-H2O+H]+ | C42H81NO8 |
| HexCer(d16:1/22:0) | SP | HexCer-NS | 576.571936 | 755.627519 | [M-H2O+H]+ | C44H85NO8 |
| HexCer(d16:1/24:0) | SP | HexCer-NS | 604.603236 | 783.658819 | [M-H2O+H]+ | C46H89NO8 |
| HexCer(d18:1/16:0) | SP | HexCer-NS | 520.509336 | 699.564919 | [M-H2O+H]+ | C40H77NO8 |
| HexCer(d18:1/16:1) | SP | HexCer-NS | 518.493686 | 697.549269 | [M-H2O+H]+ | C40H75NO8 |
| HexCer(d18:1/17:0) | SP | HexCer-NS | 534.524986 | 713.580569 | [M-H2O+H]+ | C41H79NO8 |
| HexCer(d18:1/18:0) | SP | HexCer-NS | 548.540636 | 727.596219 | [M-H2O+H]+ | C42H81NO8 |
| HexCer(d18:1/18:1) | SP | HexCer-NS | 546.524986 | 725.580569 | [M-H2O+H]+ | C42H79NO8 |
| HexCer(d18:1/20:0) | SP | HexCer-NS | 576.571936 | 755.627519 | [M-H2O+H]+ | C44H85NO8 |
| HexCer(d18:1/20:1) | SP | HexCer-NS | 574.556286 | 753.611869 | [M-H2O+H]+ | C44H83NO8 |
| HexCer(d18:1/23:0) | SP | HexCer-NS | 618.618886 | 797.674469 | [M-H2O+H]+ | C47H91NO8 |
| HexCer(d18:1/24:0) | SP | HexCer-NS | 632.634536 | 811.690119 | [M-H2O+H]+ | C48H93NO8 |
| HexCer(d18:1/24:1) | SP | HexCer-NS | 630.618886 | 809.674469 | [M-H2O+H]+ | C48H91NO8 |
| HexCer(d18:1/25:0) | SP | HexCer-NS | 646.650186 | 825.705769 | [M-H2O+H]+ | C49H95NO8 |
| HexCer(d18:1/26:0) | SP | HexCer-NS | 660.665836 | 839.721419 | [M-H2O+H]+ | C50H97NO8 |
| HexCer(d18:2/16:0) | SP | HexCer-NS | 518.493686 | 697.549269 | [M-H2O+H]+ | C40H75NO8 |
| HexCer(d18:2/20:0) | SP | HexCer-NS | 574.556286 | 753.611869 | [M-H2O+H]+ | C44H83NO8 |
| HexCer(d18:2/22:0) | SP | HexCer-NS | 602.587586 | 781.643169 | [M-H2O+H]+ | C46H87NO8 |
| HexCer(d18:2/24:0) | SP | HexCer-NS | 630.618886 | 809.674469 | [M-H2O+H]+ | C48H91NO8 |
| HexCer(d18:2/25:0) | SP | HexCer-NS | 644.634536 | 823.690119 | [M-H2O+H]+ | C49H93NO8 |
| HexCer(d19:1/24:0) | SP | HexCer-NS | 646.650186 | 825.705769 | [M-H2O+H]+ | C49H95NO8 |
| HexCer(t14:0/24:2(2OH)) | SP | HexCer-AP | 606.5455709 | 785.6016979 | [M-H2O+H]+ | C44H83NO10 |
| HexCer(t14:1/24:0(2OH)) | SP | HexCer-AP | 608.5612209 | 787.6173479 | [M-H2O+H]+ | C44H85NO10 |
| HexCer(t14:1/24:1(2OH)) | SP | HexCer-AP | 606.5455709 | 785.6016979 | [M-H2O+H]+ | C44H83NO10 |
| HexCer(t15:0/16:2(2OH)) | SP | HexCer-AP | 508.4360204 | 687.4921474 | [M-H2O+H]+ | C37H69NO10 |
| HexCer(t17:2/16:0(2OH)) | SP | HexCer-AP | 536.4673206 | 715.5234476 | [M-H2O+H]+ | C39H73NO10 |
| HexCer(t17:2/24:2(2OH)) | SP | HexCer-AP | 644.5612209 | 823.6173479 | [M-H2O+H]+ | C47H85NO10 |
| HexCer(t17:2/34:2(2OH)) | SP | HexCer-AP | 784.7177216 | 963.7738486 | [M-H2O+H]+ | C57H105NO10 |
| HexCer(t17:2/40:1(2OH)) | SP | HexCer-AP | 870.827272 | 1049.883399 | [M-H2O+H]+ | C63H119NO10 |
| HexCer(t17:2/42:1(2OH)) | SP | HexCer-AP | 898.8585722 | 1077.914699 | [M-H2O+H]+ | C65H123NO10 |
| HexCer(t18:0/20:1(2OH)) | SP | HexCer-AP | 608.5612209 | 787.6173479 | [M-H2O+H]+ | C44H85NO10 |
| HexCer(t18:0/24:0(2OH)) | SP | HexCer-AP | 666.6394713 | 845.6955983 | [M-H2O+H]+ | C48H95NO10 |
| HexCer(t18:1/20:0(2OH)) | SP | HexCer-AP | 608.5612209 | 787.6173479 | [M-H2O+H]+ | C44H85NO10 |
| HexCer(t18:1/20:1(2OH)) | SP | HexCer-AP | 606.5455709 | 785.6016979 | [M-H2O+H]+ | C44H83NO10 |
| HexCer(t20:2/18:0(2OH)) | SP | HexCer-AP | 606.5455709 | 785.6016979 | [M-H2O+H]+ | C44H83NO10 |
| HexCer(t20:2/38:2(2OH)) | SP | HexCer-AP | 882.827272 | 1061.883399 | [M-H2O+H]+ | C64H119NO10 |
| HexCer(t22:1/16:1(2OH)) | SP | HexCer-AP | 606.5455709 | 785.6016979 | [M-H2O+H]+ | C44H83NO10 |
| LNAPE(16:0/N-18:1) | GP | LNAPE | 716.523031 | 717.530856 | [M-H]- | C39H76NO8P |
| LNAPE(16:1/N-16:0) | GP | LNAPE | 688.491731 | 689.499556 | [M-H]- | C37H72NO8P |
| LNAPE(18:1/N-18:2) | GP | LNAPE | 740.523031 | 741.530856 | [M-H]- | C41H76NO8P |
| LNAPE(18:2/N-18:2) | GP | LNAPE | 738.507381 | 739.515206 | [M-H]- | C41H74NO8P |
| LNAPE(20:4/N-18:2) | GP | LNAPE | 762.507381 | 763.515206 | [M-H]- | C43H74NO8P |
| LNAPE(20:4/N-22:4) | GP | LNAPE | 814.538681 | 815.546506 | [M-H]- | C47H78NO8P |
| LNAPE(22:5/N-20:2) | GP | LNAPE | 816.554331 | 817.562156 | [M-H]- | C47H80NO8P |
| LNAPE(22:6/N-20:1) | GP | LNAPE | 816.554331 | 817.562156 | [M-H]- | C47H80NO8P |
| LPA(0:0/16:0) | GP | LPA | 409.235515 | 410.24334 | [M-H]- | C19H39O7P |
| LPA(0:0/18:2) | GP | LPA | 433.235517 | 434.243343 | [M-H]- | C21H39O7P |
| LPA(0:0/20:4) | GP | LPA | 457.235517 | 458.243343 | [M-H]- | C23H39O7P |
| LPC(0:0/15:0) | GP | LPC | 482.32181 | 481.316841 | [M+H]+ | C23H48NO7P |
| LPC(0:0/16:0) | GP | LPC | 496.340317 | 495.332491 | [M+H]+ | C24H50NO7P |
| LPC(0:0/17:0) | GP | LPC | 510.35565 | 509.348141 | [M+H]+ | C25H52NO7P |
| LPC(0:0/18:0) | GP | LPC | 524.371617 | 523.363791 | [M+H]+ | C26H54NO7P |
| LPC(0:0/18:1) | GP | LPC | 522.355967 | 521.348141 | [M+H]+ | C26H52NO7P |
| LPC(0:0/18:2) | GP | LPC | 520.340317 | 519.332491 | [M+H]+ | C26H50NO7P |
| LPC(0:0/19:0) | GP | LPC | 538.387627 | 537.379441 | [M+H]+ | C27H56NO7P |
| LPC(0:0/20:0) | GP | LPC | 552.402917 | 551.395091 | [M+H]+ | C28H58NO7P |
| LPC(0:0/20:1) | GP | LPC | 550.387267 | 549.379441 | [M+H]+ | C28H56NO7P |
| LPC(0:0/20:2) | GP | LPC | 548.371617 | 547.363791 | [M+H]+ | C28H54NO7P |
| LPC(0:0/22:1) | GP | LPC | 578.418567 | 577.410741 | [M+H]+ | C30H60NO7P |
| LPC(0:0/22:4) | GP | LPC | 572.371617 | 571.363791 | [M+H]+ | C30H54NO7P |
| LPC(14:0/0:0) | GP | LPC | 468.309017 | 467.301191 | [M+H]+ | C22H46NO7P |
| LPC(15:0/0:0) | GP | LPC | 482.32181 | 481.316841 | [M+H]+ | C23H48NO7P |
| LPC(16:0/0:0) | GP | LPC | 496.340317 | 495.332491 | [M+H]+ | C24H50NO7P |
| LPC(16:1/0:0) | GP | LPC | 494.324667 | 493.316841 | [M+H]+ | C24H48NO7P |
| LPC(17:0/0:0) | GP | LPC | 510.35565 | 509.348141 | [M+H]+ | C25H52NO7P |
| LPC(17:1/0:0) | GP | LPC | 508.33932 | 507.332491 | [M+H]+ | C25H50NO7P |
| LPC(18:0/0:0) | GP | LPC | 524.371617 | 523.363791 | [M+H]+ | C26H54NO7P |
| LPC(18:1/0:0) | GP | LPC | 522.355967 | 521.348141 | [M+H]+ | C26H52NO7P |
| LPC(18:2/0:0) | GP | LPC | 520.340317 | 519.332491 | [M+H]+ | C26H50NO7P |
| LPC(18:3/0:0) | GP | LPC | 518.324667 | 517.316841 | [M+H]+ | C26H48NO7P |
| LPC(19:0/0:0) | GP | LPC | 538.387627 | 537.379441 | [M+H]+ | C27H56NO7P |
| LPC(19:1/0:0) | GP | LPC | 536.37085 | 535.363791 | [M+H]+ | C27H54NO7P |
| LPC(20:0/0:0) | GP | LPC | 552.402917 | 551.395091 | [M+H]+ | C28H58NO7P |
| LPC(20:1/0:0) | GP | LPC | 550.387267 | 549.379441 | [M+H]+ | C28H56NO7P |
| LPC(20:2/0:0) | GP | LPC | 548.371617 | 547.363791 | [M+H]+ | C28H54NO7P |
| LPC(20:3/0:0) | GP | LPC | 546.355967 | 545.348141 | [M+H]+ | C28H52NO7P |
| LPC(20:4/0:0) | GP | LPC | 544.340317 | 543.332491 | [M+H]+ | C28H50NO7P |
| LPC(20:5/0:0) | GP | LPC | 542.324667 | 541.316841 | [M+H]+ | C28H48NO7P |
| LPC(22:0/0:0) | GP | LPC | 580.434217 | 579.426391 | [M+H]+ | C30H62NO7P |
| LPC(22:1/0:0) | GP | LPC | 578.418567 | 577.410741 | [M+H]+ | C30H60NO7P |
| LPC(22:2/0:0) | GP | LPC | 576.402917 | 575.395091 | [M+H]+ | C30H58NO7P |
| LPC(22:4/0:0) | GP | LPC | 572.371617 | 571.363791 | [M+H]+ | C30H54NO7P |
| LPC(22:6/0:0) | GP | LPC | 568.340317 | 567.332491 | [M+H]+ | C30H50NO7P |
| LPC(24:0/0:0) | GP | LPC | 608.465517 | 607.457691 | [M+H]+ | C32H66NO7P |
| LPC(24:1/0:0) | GP | LPC | 606.449867 | 605.442041 | [M+H]+ | C32H64NO7P |
| LPC(24:2) | GP | LPC | 604.434216 | 603.426391 | [M+H]+ | C32H62NO7P |
| LPC(O-14:0) | GP | LPC-O | 454.329725 | 453.321926 | [M+H]+ | C22H48NO6P |
| LPC(O-16:0) | GP | LPC-O | 482.361025 | 481.353226 | [M+H]+ | C24H52NO6P |
| LPC(O-16:1) | GP | LPC-O | 480.345402 | 479.337576 | [M+H]+ | C24H50NO6P |
| LPC(O-18:0) | GP | LPC-O | 510.392325 | 509.384526 | [M+H]+ | C26H56NO6P |
| LPC(O-18:1) | GP | LPC-O | 508.376725 | 507.368876 | [M+H]+ | C26H54NO6P |
| LPC(O-18:2) | GP | LPC-O | 506.361025 | 505.353226 | [M+H]+ | C26H52NO6P |
| LPC(O-20:0) | GP | LPC-O | 538.423625 | 537.415826 | [M+H]+ | C28H60NO6P |
| LPC(O-20:1) | GP | LPC-O | 536.408025 | 535.400176 | [M+H]+ | C28H58NO6P |
| LPC(O-20:2) | GP | LPC-O | 534.392325 | 533.384526 | [M+H]+ | C28H56NO6P |
| LPC(O-22:0) | GP | LPC-O | 566.454925 | 565.447126 | [M+H]+ | C30H64NO6P |
| LPC(O-22:2) | GP | LPC-O | 562.423625 | 561.415826 | [M+H]+ | C30H60NO6P |
| LPC(O-24:0) | GP | LPC-O | 594.486251 | 593.478426 | [M+H]+ | C32H68NO6P |
| LPC(O-24:1) | GP | LPC-O | 592.470601 | 591.462776 | [M+H]+ | C32H66NO6P |
| LPE(0:0/16:0) | GP | LPE | 454.293364 | 453.285541 | [M+H]+ | C21H44NO7P |
| LPE(0:0/18:0) | GP | LPE | 482.324664 | 481.316841 | [M+H]+ | C23H48NO7P |
| LPE(0:0/18:1) | GP | LPE | 480.309014 | 479.301191 | [M+H]+ | C23H46NO7P |
| LPE(0:0/18:2) | GP | LPE | 478.293364 | 477.285541 | [M+H]+ | C23H44NO7P |
| LPE(0:0/20:1) | GP | LPE | 508.340315 | 507.332491 | [M+H]+ | C25H50NO7P |
| LPE(0:0/20:3) | GP | LPE | 504.309014 | 503.301191 | [M+H]+ | C25H46NO7P |
| LPE(16:0/0:0) | GP | LPE | 454.293364 | 453.285541 | [M+H]+ | C21H44NO7P |
| LPE(16:1/0:0) | GP | LPE | 452.277714 | 451.269891 | [M+H]+ | C21H42NO7P |
| LPE(17:0/0:0) | GP | LPE | 468.30493 | 467.301191 | [M+H]+ | C22H46NO7P |
| LPE(18:0/0:0) | GP | LPE | 482.324664 | 481.316841 | [M+H]+ | C23H48NO7P |
| LPE(18:1/0:0) | GP | LPE | 480.309014 | 479.301191 | [M+H]+ | C23H46NO7P |
| LPE(18:2/0:0) | GP | LPE | 478.293364 | 477.285541 | [M+H]+ | C23H44NO7P |
| LPE(18:3/0:0) | GP | LPE | 476.277714 | 475.269891 | [M+H]+ | C23H42NO7P |
| LPE(20:0/0:0) | GP | LPE | 510.355965 | 509.348141 | [M+H]+ | C25H52NO7P |
| LPE(20:1/0:0) | GP | LPE | 508.340315 | 507.332491 | [M+H]+ | C25H50NO7P |
| LPE(20:2/0:0) | GP | LPE | 506.324664 | 505.316841 | [M+H]+ | C25H48NO7P |
| LPE(20:4/0:0) | GP | LPE | 502.293364 | 501.285541 | [M+H]+ | C25H44NO7P |
| LPE(20:5/0:0) | GP | LPE | 500.277714 | 499.269891 | [M+H]+ | C25H42NO7P |
| LPE(22:0/0:0) | GP | LPE | 538.387265 | 537.379441 | [M+H]+ | C27H56NO7P |
| LPE(22:4/0:0) | GP | LPE | 530.324664 | 529.316841 | [M+H]+ | C27H48NO7P |
| LPE(22:6/0:0) | GP | LPE | 526.293364 | 525.285541 | [M+H]+ | C27H44NO7P |
| LPE(24:0/0:0) | GP | LPE | 566.418565 | 565.410741 | [M+H]+ | C29H60NO7P |
| LPE(P-16:0) | GP | LPE-P | 438.3 | 437.290626 | [M+H]+ | C21H44NO6P |
| LPE(P-18:0) | GP | LPE-P | 466.3 | 465.321926 | [M+H]+ | C23H48NO6P |
| LPE(P-18:1) | GP | LPE-P | 464.3 | 463.306276 | [M+H]+ | C23H46NO6P |
| LPE(P-20:0) | GP | LPE-P | 494.3 | 493.353226 | [M+H]+ | C25H52NO6P |
| LPE(P-22:0) | GP | LPE-P | 522.38904 | 521.384526 | [M+H]+ | C27H56NO6P |
| LPG(16:0/0:0) | GP | LPG | 483.272298 | 484.280122 | [M-H]- | C22H45O9P |
| LPG(18:0/0:0) | GP | LPG | 511.303597 | 512.311422 | [M-H]- | C24H49O9P |
| LPG(18:1/0:0) | GP | LPG | 509.287948 | 510.295772 | [M-H]- | C24H47O9P |
| LPG(18:2/0:0) | GP | LPG | 507.272298 | 508.280122 | [M-H]- | C24H45O9P |
| LPI(16:0/0:0) | GP | LPI | 571.288343 | 572.296167 | [M-H]- | C25H49O12P |
| LPI(16:1/0:0) | GP | LPI | 569.272693 | 570.280517 | [M-H]- | C25H47O12P |
| LPI(18:0/0:0) | GP | LPI | 599.319643 | 600.327467 | [M-H]- | C27H53O12P |
| LPI(18:1/0:0) | GP | LPI | 597.303993 | 598.311817 | [M-H]- | C27H51O12P |
| LPI(18:2/0:0) | GP | LPI | 595.288343 | 596.296167 | [M-H]- | C27H49O12P |
| LPI(20:2) | GP | LPI | 623.319642 | 624.327467 | [M-H]- | C29H53O12P |
| LPI(20:3/0:0) | GP | LPI | 621.303993 | 622.311817 | [M-H]- | C29H51O12P |
| LPI(20:4/0:0) | GP | LPI | 619.288343 | 620.296167 | [M-H]- | C29H49O12P |
| LPS(18:1/0:0) | GP | LPS | 522.283196 | 523.291021 | [M-H]- | C24H46NO9P |
| LPS(20:0/0:0) | GP | LPS | 552.330146 | 553.337971 | [M-H]- | C26H52NO9P |
| LPS(20:4/0:0) | GP | LPS | 544.267546 | 545.275371 | [M-H]- | C26H44NO9P |
| MG(14:0) | GL | MG | 320.28944 | 302.24571 | [M+NH4]+ | C17H34O4 |
| MG(16:0) | GL | MG | 348.320751 | 330.27701 | [M+NH4]+ | C19H38O4 |
| MG(17:0) | GL | MG | 362.320751 | 344.29266 | [M+NH4]+ | C20H40O4 |
| MG(18:0) | GL | MG | 376.352051 | 358.30831 | [M+NH4]+ | C21H42O4 |
| MG(18:1) | GL | MG | 374.336401 | 356.29266 | [M+NH4]+ | C21H40O4 |
| MG(18:2) | GL | MG | 372.31012 | 354.27701 | [M+NH4]+ | C21H38O4 |
| PA(10:0_20:4) | GP | PA | 611.3712858 | 612.3791058 | [M-H]- | C33H57O8P |
| PA(12:0_12:0) | GP | PA | 535.3399857 | 536.3478057 | [M-H]- | C27H53O8P |
| PA(12:0_18:4) | GP | PA | 611.3712858 | 612.3791058 | [M-H]- | C33H57O8P |
| PA(12:0_20:5) | GP | PA | 637.3869359 | 638.3947559 | [M-H]- | C35H59O8P |
| PA(12:0_22:4) | GP | PA | 667.4338861 | 668.4417061 | [M-H]- | C37H65O8P |
| PA(12:0_22:6) | GP | PA | 663.4025859 | 664.4104059 | [M-H]- | C37H61O8P |
| PA(16:0_18:2) | GP | PA | 671.465182 | 672.473007 | [M-H]- | C37H69O8P |
| PA(16:0_20:0) | GP | PA | 703.5277864 | 704.5356064 | [M-H]- | C39H77O8P |
| PA(16:0_20:1) | GP | PA | 701.5121364 | 702.5199564 | [M-H]- | C39H75O8P |
| PA(16:0_20:2) | GP | PA | 699.4964863 | 700.5043063 | [M-H]- | C39H73O8P |
| PA(16:0_22:0) | GP | PA | 731.5590866 | 732.5669066 | [M-H]- | C41H81O8P |
| PA(16:0_22:5) | GP | PA | 721.4808362 | 722.4886562 | [M-H]- | C41H71O8P |
| PA(17:1_21:1) | GP | PA | 727.5277864 | 728.5356064 | [M-H]- | C41H77O8P |
| PA(18:0_20:3) | GP | PA | 725.5121364 | 726.5199564 | [M-H]- | C41H75O8P |
| PA(18:0_22:4) | GP | PA | 751.5277864 | 752.5356064 | [M-H]- | C43H77O8P |
| PA(18:0_22:5) | GP | PA | 749.5121364 | 750.5199564 | [M-H]- | C43H75O8P |
| PA(18:0_22:6) | GP | PA | 747.496482 | 748.504307 | [M-H]- | C43H73O8P |
| PA(18:0_23:0) | GP | PA | 773.6060368 | 774.6138568 | [M-H]- | C44H87O8P |
| PA(18:0_25:0) | GP | PA | 801.6373369 | 802.6451569 | [M-H]- | C46H91O8P |
| PA(18:1_16:3) | GP | PA | 667.4338861 | 668.4417061 | [M-H]- | C37H65O8P |
| PA(18:1_18:2) | GP | PA | 697.480832 | 698.488657 | [M-H]- | C39H71O8P |
| PA(18:1_20:1) | GP | PA | 727.5277864 | 728.5356064 | [M-H]- | C41H77O8P |
| PA(18:1_20:2) | GP | PA | 725.5121364 | 726.5199564 | [M-H]- | C41H75O8P |
| PA(18:1_22:6) | GP | PA | 745.480832 | 746.488657 | [M-H]- | C43H71O8P |
| PA(18:2_20:2) | GP | PA | 723.4964863 | 724.5043063 | [M-H]- | C41H73O8P |
| PA(18:2_22:2) | GP | PA | 751.5277864 | 752.5356064 | [M-H]- | C43H77O8P |
| PA(18:2_22:5) | GP | PA | 745.4808362 | 746.4886562 | [M-H]- | C43H71O8P |
| PA(19:0_20:4) | GP | PA | 737.5121364 | 738.5199564 | [M-H]- | C42H75O8P |
| PA(19:1_24:1) | GP | PA | 797.6060368 | 798.6138568 | [M-H]- | C46H87O8P |
| PA(20:0_16:1) | GP | PA | 701.5121364 | 702.5199564 | [M-H]- | C39H75O8P |
| PA(20:0_18:2) | GP | PA | 727.5277864 | 728.5356064 | [M-H]- | C41H77O8P |
| PA(20:0_18:3) | GP | PA | 725.5121364 | 726.5199564 | [M-H]- | C41H75O8P |
| PA(20:0_20:3) | GP | PA | 753.5434365 | 754.5512565 | [M-H]- | C43H79O8P |
| PA(20:0_20:4) | GP | PA | 751.5277864 | 752.5356064 | [M-H]- | C43H77O8P |
| PA(20:0_22:6) | GP | PA | 775.5277864 | 776.5356064 | [M-H]- | C45H77O8P |
| PA(20:1_18:2) | GP | PA | 725.5121364 | 726.5199564 | [M-H]- | C41H75O8P |
| PA(20:1_20:3) | GP | PA | 751.5277864 | 752.5356064 | [M-H]- | C43H77O8P |
| PA(20:1_20:4) | GP | PA | 749.5121364 | 750.5199564 | [M-H]- | C43H75O8P |
| PA(20:1_20:5) | GP | PA | 747.4964863 | 748.5043063 | [M-H]- | C43H73O8P |
| PA(20:1_22:4) | GP | PA | 777.5434365 | 778.5512565 | [M-H]- | C45H79O8P |
| PA(20:2_20:3) | GP | PA | 749.5121364 | 750.5199564 | [M-H]- | C43H75O8P |
| PA(20:2_20:4) | GP | PA | 747.4964863 | 748.5043063 | [M-H]- | C43H73O8P |
| PA(20:2_22:5) | GP | PA | 773.5121364 | 774.5199564 | [M-H]- | C45H75O8P |
| PA(22:1_18:2) | GP | PA | 753.5434365 | 754.5512565 | [M-H]- | C43H79O8P |
| PA(22:1_20:4) | GP | PA | 777.5434365 | 778.5512565 | [M-H]- | C45H79O8P |
| PA(24:0_20:2) | GP | PA | 811.6216868 | 812.6295068 | [M-H]- | C47H89O8P |
| PC(10:0_18:0) | GP | PC | 722.4972099 | 677.4995553 | [M+COOH]- | C36H72NO8P |
| PC(10:0_22:0) | GP | PC | 778.5598101 | 733.5621555 | [M+COOH]- | C40H80NO8P |
| PC(10:0_22:1) | GP | PC | 776.5441601 | 731.5465055 | [M+COOH]- | C40H78NO8P |
| PC(12:0_14:1) | GP | PC | 692.4502597 | 647.4526051 | [M+COOH]- | C34H66NO8P |
| PC(12:0_16:3) | GP | PC | 716.4502597 | 671.4526051 | [M+COOH]- | C36H66NO8P |
| PC(12:0_17:1) | GP | PC | 734.4972099 | 689.4995553 | [M+COOH]- | C37H72NO8P |
| PC(12:0_22:4) | GP | PC | 798.52851 | 753.5308554 | [M+COOH]- | C42H76NO8P |
| PC(13:0_14:0) | GP | PC | 708.4815598 | 663.4839052 | [M+COOH]- | C35H70NO8P |
| PC(13:0_16:0) | GP | PC | 736.5128599 | 691.5152053 | [M+COOH]- | C37H74NO8P |
| PC(13:0_18:0) | GP | PC | 764.5441601 | 719.5465055 | [M+COOH]- | C39H78NO8P |
| PC(13:0_18:1) | GP | PC | 762.52851 | 717.5308554 | [M+COOH]- | C39H76NO8P |
| PC(13:1_18:2) | GP | PC | 758.4972099 | 713.4995553 | [M+COOH]- | C39H72NO8P |
| PC(14:0_14:0) | GP | PC | 678.507381 | 677.499556 | [M+H]+ | C36H72NO8P |
| PC(14:0_16:1) | GP | PC | 748.512861 | 703.515206 | [M+COOH]- | C38H74NO8P |
| PC(14:0_17:1) | GP | PC | 762.52851 | 717.5308554 | [M+COOH]- | C39H76NO8P |
| PC(14:0_18:1) | GP | PC | 776.544161 | 731.546506 | [M+COOH]- | C40H78NO8P |
| PC(14:0_18:2) | GP | PC | 774.528511 | 729.530856 | [M+COOH]- | C40H76NO8P |
| PC(14:0_18:3) | GP | PC | 728.523031 | 727.515206 | [M+H]+ | C40H74NO8P |
| PC(14:0_19:2) | GP | PC | 788.5441601 | 743.5465055 | [M+COOH]- | C41H78NO8P |
| PC(14:0_20:4) | GP | PC | 754.538681 | 753.530856 | [M+H]+ | C42H76NO8P |
| PC(14:0_20:5) | GP | PC | 752.523031 | 751.515206 | [M+H]+ | C42H74NO8P |
| PC(14:0_22:6) | GP | PC | 778.538681 | 777.530856 | [M+H]+ | C44H76NO8P |
| PC(15:0_16:0) | GP | PC | 720.554331 | 719.546506 | [M+H]+ | C39H78NO8P |
| PC(15:0_16:1) | GP | PC | 718.538681 | 717.530856 | [M+H]+ | C39H76NO8P |
| PC(15:0_17:1) | GP | PC | 776.5441601 | 731.5465055 | [M+COOH]- | C40H78NO8P |
| PC(15:0_18:0) | GP | PC | 792.5754602 | 747.5778056 | [M+COOH]- | C41H82NO8P |
| PC(15:0_18:1) | GP | PC | 790.559811 | 745.5621555 | [M+COOH]- | C41H80NO8P |
| PC(15:0_20:3) | GP | PC | 814.559811 | 769.562156 | [M+COOH]- | C43H80NO8P |
| PC(15:0_20:4) | GP | PC | 768.554331 | 767.546506 | [M+H]+ | C43H78NO8P |
| PC(15:0_20:5) | GP | PC | 766.538681 | 765.530856 | [M+H]+ | C43H76NO8P |
| PC(15:0_22:6) | GP | PC | 836.5441601 | 791.5465055 | [M+COOH]- | C45H78NO8P |
| PC(15:1_18:1) | GP | PC | 788.5441601 | 743.5465055 | [M+COOH]- | C41H78NO8P |
| PC(15:1_18:2) | GP | PC | 786.52851 | 741.5308554 | [M+COOH]- | C41H76NO8P |
| PC(15:1_22:5) | GP | PC | 792.554331 | 791.546506 | [M+H]+ | C45H78NO8P |
| PC(16:0_14:0) | GP | PC | 750.528511 | 705.530856 | [M+COOH]- | C38H76NO8P |
| PC(16:0_16:0) | GP | PC | 734.569981 | 733.562156 | [M+H]+ | C40H80NO8P |
| PC(16:0_16:1) | GP | PC | 776.544161 | 731.546506 | [M+COOH]- | C40H78NO8P |
| PC(16:0_17:0) | GP | PC | 792.5754602 | 747.5778056 | [M+COOH]- | C41H82NO8P |
| PC(16:0_17:1) | GP | PC | 790.5598101 | 745.5621555 | [M+COOH]- | C41H80NO8P |
| PC(16:0_18:0) | GP | PC | 762.601281 | 761.593456 | [M+H]+ | C42H84NO8P |
| PC(16:0_18:1) | GP | PC | 760.585631 | 759.577806 | [M+H]+ | C42H82NO8P |
| PC(16:0_18:2) | GP | PC | 758.569981 | 757.562156 | [M+H]+ | C42H80NO8P |
| PC(16:0_18:3) | GP | PC | 800.544161 | 755.546506 | [M+COOH]- | C42H78NO8P |
| PC(16:0_19:0) | GP | PC | 820.6067603 | 775.6091057 | [M+COOH]- | C43H86NO8P |
| PC(16:0_20:2) | GP | PC | 830.591111 | 785.5934557 | [M+COOH]- | C44H84NO8P |
| PC(16:0_20:3) | GP | PC | 828.575461 | 783.577806 | [M+COOH]- | C44H82NO8P |
| PC(16:0_20:4) | GP | PC | 826.559811 | 781.562156 | [M+COOH]- | C44H80NO8P |
| PC(16:0_20:5) | GP | PC | 824.544161 | 779.546506 | [M+COOH]- | C44H78NO8P |
| PC(16:0_22:0) | GP | PC | 818.663881 | 817.656056 | [M+H]+ | C46H92NO8P |
| PC(16:0_22:1) | GP | PC | 816.648231 | 815.640406 | [M+H]+ | C46H90NO8P |
| PC(16:0_22:5) | GP | PC | 852.575461 | 807.577806 | [M+COOH]- | C46H82NO8P |
| PC(16:0_22:6) | GP | PC | 850.559811 | 805.562156 | [M+COOH]- | C46H80NO8P |
| PC(16:0_24:0) | GP | PC | 846.695181 | 845.687356 | [M+H]+ | C48H96NO8P |
| PC(16:1_16:1) | GP | PC | 774.528511 | 729.530856 | [M+COOH]- | C40H76NO8P |
| PC(16:1_17:1) | GP | PC | 788.5441601 | 743.5465055 | [M+COOH]- | C41H78NO8P |
| PC(16:1_18:1) | GP | PC | 802.559811 | 757.562156 | [M+COOH]- | C42H80NO8P |
| PC(16:1_18:2) | GP | PC | 800.544161 | 755.546506 | [M+COOH]- | C42H78NO8P |
| PC(16:1_18:3) | GP | PC | 798.528511 | 753.530856 | [M+COOH]- | C42H76NO8P |
| PC(16:1_19:2) | GP | PC | 814.5598101 | 769.5621555 | [M+COOH]- | C43H80NO8P |
| PC(16:1_20:3) | GP | PC | 826.5598101 | 781.5621555 | [M+COOH]- | C44H80NO8P |
| PC(16:1_22:5) | GP | PC | 850.559811 | 805.562156 | [M+COOH]- | C46H80NO8P |
| PC(16:1_22:6) | GP | PC | 804.554331 | 803.546506 | [M+H]+ | C46H78NO8P |
| PC(16:2_18:2) | GP | PC | 798.528511 | 753.530856 | [M+COOH]- | C42H76NO8P |
| PC(17:0_15:1) | GP | PC | 776.5441601 | 731.5465055 | [M+COOH]- | C40H78NO8P |
| PC(17:0_16:1) | GP | PC | 790.5598101 | 745.5621555 | [M+COOH]- | C41H80NO8P |
| PC(17:0_18:1) | GP | PC | 818.591111 | 773.593456 | [M+COOH]- | C43H84NO8P |
| PC(17:0_18:2) | GP | PC | 816.575461 | 771.577806 | [M+COOH]- | C43H82NO8P |
| PC(17:0_20:3) | GP | PC | 842.591111 | 797.593456 | [M+COOH]- | C45H84NO8P |
| PC(17:0_20:5) | GP | PC | 838.5598101 | 793.5621555 | [M+COOH]- | C45H80NO8P |
| PC(17:1_18:1) | GP | PC | 772.585631 | 771.577806 | [M+H]+ | C43H82NO8P |
| PC(17:1_18:2) | GP | PC | 770.569981 | 769.562156 | [M+H]+ | C43H80NO8P |
| PC(17:1_20:4) | GP | PC | 794.569981 | 793.562156 | [M+H]+ | C45H80NO8P |
| PC(18:0_14:0) | GP | PC | 778.559811 | 733.562156 | [M+COOH]- | C40H80NO8P |
| PC(18:0_18:1) | GP | PC | 788.616931 | 787.609106 | [M+H]+ | C44H86NO8P |
| PC(18:0_18:2) | GP | PC | 786.601281 | 785.593456 | [M+H]+ | C44H84NO8P |
| PC(18:0_20:2) | GP | PC | 858.622411 | 813.624756 | [M+COOH]- | C46H88NO8P |
| PC(18:0_20:3) | GP | PC | 856.606761 | 811.609106 | [M+COOH]- | C46H86NO8P |
| PC(18:0_20:4) | GP | PC | 810.601281 | 809.593456 | [M+H]+ | C46H84NO8P |
| PC(18:0_22:4) | GP | PC | 838.632581 | 837.624756 | [M+H]+ | C48H88NO8P |
| PC(18:0_22:5) | GP | PC | 880.606761 | 835.609106 | [M+COOH]- | C48H86NO8P |
| PC(18:0_22:6) | GP | PC | 878.591111 | 833.593456 | [M+COOH]- | C48H84NO8P |
| PC(18:0_24:3) | GP | PC | 868.679531 | 867.671706 | [M+H]+ | C50H94NO8P |
| PC(18:1_16:3) | GP | PC | 798.52851 | 753.5308554 | [M+COOH]- | C42H76NO8P |
| PC(18:1_17:2) | GP | PC | 814.5598101 | 769.5621555 | [M+COOH]- | C43H80NO8P |
| PC(18:1_18:2) | GP | PC | 828.575461 | 783.577806 | [M+COOH]- | C44H82NO8P |
| PC(18:1_20:4) | GP | PC | 852.575461 | 807.577806 | [M+COOH]- | C46H82NO8P |
| PC(18:1_20:5) | GP | PC | 850.559811 | 805.5621555 | [M+COOH]- | C46H80NO8P |
| PC(18:1_22:0) | GP | PC | 844.679531 | 843.671706 | [M+H]+ | C48H94NO8P |
| PC(18:1_22:1) | GP | PC | 842.663881 | 841.656056 | [M+H]+ | C48H92NO8P |
| PC(18:1_22:2) | GP | PC | 884.638061 | 839.6404059 | [M+COOH]- | C48H90NO8P |
| PC(18:1_22:6) | GP | PC | 832.585631 | 831.577806 | [M+H]+ | C48H82NO8P |
| PC(18:1_24:1) | GP | PC | 870.695181 | 869.687356 | [M+H]+ | C50H96NO8P |
| PC(18:2_18:2) | GP | PC | 826.559811 | 781.562156 | [M+COOH]- | C44H80NO8P |
| PC(18:2_18:3) | GP | PC | 824.544161 | 779.546506 | [M+COOH]- | C44H78NO8P |
| PC(18:2_19:2) | GP | PC | 840.5754602 | 795.5778056 | [M+COOH]- | C45H82NO8P |
| PC(18:2_20:0) | GP | PC | 858.622411 | 813.624756 | [M+COOH]- | C46H88NO8P |
| PC(18:2_20:3) | GP | PC | 852.575461 | 807.577806 | [M+COOH]- | C46H82NO8P |
| PC(18:2_20:4) | GP | PC | 850.559811 | 805.562156 | [M+COOH]- | C46H80NO8P |
| PC(18:2_20:5) | GP | PC | 848.544161 | 803.546506 | [M+COOH]- | C46H78NO8P |
| PC(18:2_22:1) | GP | PC | 840.648231 | 839.640406 | [M+H]+ | C48H90NO8P |
| PC(18:2_22:5) | GP | PC | 876.575461 | 831.5778056 | [M+COOH]- | C48H82NO8P |
| PC(18:2_22:6) | GP | PC | 874.559811 | 829.562156 | [M+COOH]- | C48H80NO8P |
| PC(18:3_18:1) | GP | PC | 826.559811 | 781.562156 | [M+COOH]- | C44H80NO8P |
| PC(19:0_18:1) | GP | PC | 846.622411 | 801.624756 | [M+COOH]- | C45H88NO8P |
| PC(19:0_18:2) | GP | PC | 844.606761 | 799.609106 | [M+COOH]- | C45H86NO8P |
| PC(19:0_20:4) | GP | PC | 868.606761 | 823.609106 | [M+COOH]- | C47H86NO8P |
| PC(19:1_18:2) | GP | PC | 842.591111 | 797.593456 | [M+COOH]- | C45H84NO8P |
| PC(20:0_22:6) | GP | PC | 862.632581 | 861.624756 | [M+H]+ | C50H88NO8P |
| PC(20:1_22:6) | GP | PC | 860.616931 | 859.609106 | [M+H]+ | C50H86NO8P |
| PC(20:2_18:1) | GP | PC | 856.606761 | 811.609106 | [M+COOH]- | C46H86NO8P |
| PC(20:2_20:4) | GP | PC | 878.591111 | 833.593456 | [M+COOH]- | C48H84NO8P |
| PC(20:2_22:6) | GP | PC | 858.601281 | 857.593456 | [M+H]+ | C50H84NO8P |
| PC(20:3_18:1) | GP | PC | 854.591111 | 809.593456 | [M+COOH]- | C46H84NO8P |
| PC(20:3_20:4) | GP | PC | 876.575461 | 831.577806 | [M+COOH]- | C48H82NO8P |
| PC(20:3_22:1) | GP | PC | 866.663881 | 865.656056 | [M+H]+ | C50H92NO8P |
| PC(20:4_16:1) | GP | PC | 824.544161 | 779.546506 | [M+COOH]- | C44H78NO8P |
| PC(20:4_17:0) | GP | PC | 796.569981 | 793.562156 | [M+H]+ | C45H80NO8P |
| PC(20:4_20:4) | GP | PC | 874.559811 | 829.562156 | [M+COOH]- | C48H80NO8P |
| PC(20:4_22:6) | GP | PC | 898.559811 | 853.5621555 | [M+COOH]- | C50H80NO8P |
| PC(20:5_18:0) | GP | PC | 852.575461 | 807.577806 | [M+COOH]- | C46H82NO8P |
| PC(22:4_16:0) | GP | PC | 854.591111 | 809.593456 | [M+COOH]- | C46H84NO8P |
| PC(22:6_17:0) | GP | PC | 820.585631 | 819.577806 | [M+H]+ | C47H82NO8P |
| PC(24:0_18:1) | GP | PC | 872.710831 | 871.703006 | [M+H]+ | C50H98NO8P |
| PC(24:0_18:2) | GP | PC | 914.685011 | 869.687356 | [M+COOH]- | C50H96NO8P |
| PC(O-14:0_20:4) | GP | PC-O | 740.559419 | 739.551591 | [M+H]+ | C42H78NO7P |
| PC(O-16:0_14:0) | GP | PC-O | 692.559419 | 691.551591 | [M+H]+ | C38H78NO7P |
| PC(O-16:0_14:1) | GP | PC-O | 690.543769 | 689.535941 | [M+H]+ | C38H76NO7P |
| PC(O-16:0_16:0) | GP | PC-O | 720.590719 | 719.582891 | [M+H]+ | C40H82NO7P |
| PC(O-16:0_16:1) | GP | PC-O | 718.575066 | 717.567241 | [M+H]+ | C40H80NO7P |
| PC(O-16:0_18:2) | GP | PC-O | 744.590719 | 743.582891 | [M+H]+ | C42H82NO7P |
| PC(O-16:0_20:4) | GP | PC-O | 768.590725 | 767.582891 | [M+H]+ | C44H82NO7P |
| PC(O-16:0_22:0) | GP | PC-O | 804.684619 | 803.676791 | [M+H]+ | C46H94NO7P |
| PC(O-16:1_16:1) | GP | PC-O | 716.559419 | 715.551591 | [M+H]+ | C40H78NO7P |
| PC(O-16:1_18:2) | GP | PC-O | 742.575025 | 741.567241 | [M+H]+ | C42H80NO7P |
| PC(O-16:1_20:4) | GP | PC-O | 766.575025 | 765.567241 | [M+H]+ | C44H80NO7P |
| PC(O-16:1_20:5) | GP | PC-O | 764.559419 | 763.551591 | [M+H]+ | C44H78NO7P |
| PC(O-16:1_22:6) | GP | PC-O | 790.575069 | 789.567241 | [M+H]+ | C46H80NO7P |
| PC(O-16:1_24:2) | GP | PC-O | 826.668925 | 825.661141 | [M+H]+ | C48H92NO7P |
| PC(O-18:0_16:0) | GP | PC-O | 748.622019 | 747.614191 | [M+H]+ | C42H86NO7P |
| PC(O-18:0_18:2) | GP | PC-O | 772.622019 | 771.614191 | [M+H]+ | C44H86NO7P |
| PC(O-18:0_20:3) | GP | PC-O | 798.637625 | 797.629841 | [M+H]+ | C46H88NO7P |
| PC(O-18:0_20:4) | GP | PC-O | 796.622025 | 795.614191 | [M+H]+ | C46H86NO7P |
| PC(O-18:0_22:6) | GP | PC-O | 820.622019 | 819.614191 | [M+H]+ | C48H86NO7P |
| PC(O-18:0_24:1) | GP | PC-O | 858.731525 | 857.723741 | [M+H]+ | C50H100NO7P |
| PC(O-18:1_16:0) | GP | PC-O | 746.606325 | 745.598541 | [M+H]+ | C42H84NO7P |
| PC(O-18:1_18:2) | GP | PC-O | 770.606325 | 769.598541 | [M+H]+ | C44H84NO7P |
| PC(O-18:1_20:1) | GP | PC-O | 800.653325 | 799.645491 | [M+H]+ | C46H90NO7P |
| PC(O-18:1_20:4) | GP | PC-O | 794.606325 | 793.598541 | [M+H]+ | C46H84NO7P |
| PC(O-18:1_22:0) | GP | PC-O | 830.700225 | 829.692441 | [M+H]+ | C48H96NO7P |
| PC(O-18:1_22:1) | GP | PC-O | 828.684625 | 827.676791 | [M+H]+ | C48H94NO7P |
| PC(O-18:1_22:6) | GP | PC-O | 818.606369 | 817.598541 | [M+H]+ | C48H84NO7P |
| PC(O-18:1_24:1) | GP | PC-O | 856.715925 | 855.708091 | [M+H]+ | C50H98NO7P |
| PC(O-18:2_20:4) | GP | PC-O | 792.590719 | 791.582891 | [M+H]+ | C46H82NO7P |
| PC(O-20:0_20:4) | GP | PC-O | 824.653325 | 823.645491 | [M+H]+ | C48H90NO7P |
| PC(O-20:0_22:4) | GP | PC-O | 852.684625 | 851.676791 | [M+H]+ | C50H94NO7P |
| PC(O-20:1_20:4) | GP | PC-O | 822.637669 | 821.629841 | [M+H]+ | C48H88NO7P |
| PC(O-22:1_20:4) | GP | PC-O | 850.668969 | 849.661141 | [M+H]+ | C50H92NO7P |
| PC(O-22:2_20:4) | GP | PC-O | 848.653325 | 847.645491 | [M+H]+ | C50H90NO7P |
| PC(O-24:0_20:4) | GP | PC-O | 880.715925 | 879.708091 | [M+H]+ | C52H98NO7P |
| PC(O-24:1_20:4) | GP | PC-O | 878.700225 | 877.692441 | [M+H]+ | C52H96NO7P |
| PE(12:0_14:0) | GP | PE | 606.413485 | 607.421305 | [M-H]- | C31H62NO8P |
| PE(12:0_16:0) | GP | PE | 634.4447851 | 635.4526051 | [M-H]- | C33H66NO8P |
| PE(12:0_16:1) | GP | PE | 632.429135 | 633.436955 | [M-H]- | C33H64NO8P |
| PE(12:0_17:0) | GP | PE | 648.4604352 | 649.4682552 | [M-H]- | C34H68NO8P |
| PE(12:0_17:1) | GP | PE | 646.4447851 | 647.4526051 | [M-H]- | C34H66NO8P |
| PE(12:0_18:1) | GP | PE | 660.4604352 | 661.4682552 | [M-H]- | C35H68NO8P |
| PE(12:0_22:4) | GP | PE | 710.4760852 | 711.4839052 | [M-H]- | C39H70NO8P |
| PE(13:0_15:0) | GP | PE | 634.4447851 | 635.4526051 | [M-H]- | C33H66NO8P |
| PE(13:0_19:2) | GP | PE | 686.4760852 | 687.4839052 | [M-H]- | C37H70NO8P |
| PE(13:0_20:4) | GP | PE | 696.4604352 | 697.4682552 | [M-H]- | C38H68NO8P |
| PE(13:0_20:5) | GP | PE | 694.4447851 | 695.4526051 | [M-H]- | C38H66NO8P |
| PE(14:0_20:2) | GP | PE | 714.5073853 | 715.5152053 | [M-H]- | C39H74NO8P |
| PE(14:0_22:4) | GP | PE | 738.5073853 | 739.5152053 | [M-H]- | C41H74NO8P |
| PE(15:0_18:2) | GP | PE | 700.4917353 | 701.4995553 | [M-H]- | C38H72NO8P |
| PE(15:0_22:4) | GP | PE | 752.5230354 | 753.5308554 | [M-H]- | C42H76NO8P |
| PE(16:0_16:0) | GP | PE | 690.507383 | 691.515206 | [M-H]- | C37H74NO8P |
| PE(16:0_18:1) | GP | PE | 716.523033 | 717.530856 | [M-H]- | C39H76NO8P |
| PE(16:0_18:3) | GP | PE | 712.4917353 | 713.4995553 | [M-H]- | C39H72NO8P |
| PE(16:0_19:2) | GP | PE | 728.5230354 | 729.5308554 | [M-H]- | C40H76NO8P |
| PE(16:0_20:3) | GP | PE | 740.523033 | 741.530856 | [M-H]- | C41H76NO8P |
| PE(16:0_20:4) | GP | PE | 738.507383 | 739.515206 | [M-H]- | C41H74NO8P |
| PE(16:0_20:5) | GP | PE | 736.491732 | 737.499556 | [M-H]- | C41H72NO8P |
| PE(16:0_22:4) | GP | PE | 766.538683 | 767.546506 | [M-H]- | C43H78NO8P |
| PE(16:0_22:5) | GP | PE | 764.523033 | 765.530856 | [M-H]- | C43H76NO8P |
| PE(16:1_16:0) | GP | PE | 688.491732 | 689.499556 | [M-H]- | C37H72NO8P |
| PE(16:1_18:0) | GP | PE | 716.523033 | 717.530856 | [M-H]- | C39H76NO8P |
| PE(16:1_18:2) | GP | PE | 712.491732 | 713.499556 | [M-H]- | C39H72NO8P |
| PE(16:1_20:4) | GP | PE | 736.491732 | 737.499556 | [M-H]- | C41H72NO8P |
| PE(16:1_22:4) | GP | PE | 764.5230354 | 765.5308554 | [M-H]- | C43H76NO8P |
| PE(17:0_18:2) | GP | PE | 728.5230354 | 729.5308554 | [M-H]- | C40H76NO8P |
| PE(17:0_20:3) | GP | PE | 754.54095 | 755.546506 | [M-H]- | C42H78NO8P |
| PE(17:0_20:4) | GP | PE | 752.52448 | 753.530856 | [M-H]- | C42H76NO8P |
| PE(17:0_22:5) | GP | PE | 778.5451 | 779.546506 | [M-H]- | C44H78NO8P |
| PE(17:0_22:6) | GP | PE | 776.52045 | 777.530856 | [M-H]- | C44H76NO8P |
| PE(17:1_18:1) | GP | PE | 728.52051 | 729.530856 | [M-H]- | C40H76NO8P |
| PE(17:2_20:3) | GP | PE | 750.5073853 | 751.5152053 | [M-H]- | C42H74NO8P |
| PE(18:0_18:3) | GP | PE | 740.5230354 | 741.5308554 | [M-H]- | C41H76NO8P |
| PE(18:0_20:5) | GP | PE | 764.523033 | 765.530856 | [M-H]- | C43H76NO8P |
| PE(18:0_22:5) | GP | PE | 792.554333 | 793.562156 | [M-H]- | C45H80NO8P |
| PE(18:1_16:1) | GP | PE | 714.507383 | 715.515206 | [M-H]- | C39H74NO8P |
| PE(18:1_18:1) | GP | PE | 742.538683 | 743.546506 | [M-H]- | C41H78NO8P |
| PE(18:1_18:2) | GP | PE | 740.523033 | 741.530856 | [M-H]- | C41H76NO8P |
| PE(18:1_18:3) | GP | PE | 738.5073853 | 739.5152053 | [M-H]- | C41H74NO8P |
| PE(18:1_20:2) | GP | PE | 768.5543355 | 769.5621555 | [M-H]- | C43H80NO8P |
| PE(18:1_20:3) | GP | PE | 766.538683 | 767.546506 | [M-H]- | C43H78NO8P |
| PE(18:1_20:4) | GP | PE | 764.523033 | 765.530856 | [M-H]- | C43H76NO8P |
| PE(18:1_22:1) | GP | PE | 798.601283 | 799.609106 | [M-H]- | C45H86NO8P |
| PE(18:1_22:2) | GP | PE | 796.585633 | 797.593456 | [M-H]- | C45H84NO8P |
| PE(18:1_22:5) | GP | PE | 790.538683 | 791.546506 | [M-H]- | C45H78NO8P |
| PE(18:1_24:1) | GP | PE | 826.632583 | 827.640406 | [M-H]- | C47H90NO8P |
| PE(18:2_16:0) | GP | PE | 714.507383 | 715.515206 | [M-H]- | C39H74NO8P |
| PE(18:2_18:2) | GP | PE | 738.507383 | 739.515206 | [M-H]- | C41H74NO8P |
| PE(18:2_18:3) | GP | PE | 736.4917353 | 737.4995553 | [M-H]- | C41H72NO8P |
| PE(18:2_19:1) | GP | PE | 754.54095 | 755.546506 | [M-H]- | C42H78NO8P |
| PE(18:2_20:2) | GP | PE | 766.5386855 | 767.5465055 | [M-H]- | C43H78NO8P |
| PE(18:2_20:3) | GP | PE | 764.5230354 | 765.5308554 | [M-H]- | C43H76NO8P |
| PE(18:2_22:1) | GP | PE | 796.585633 | 797.593456 | [M-H]- | C45H84NO8P |
| PE(18:2_22:5) | GP | PE | 788.5230354 | 789.5308554 | [M-H]- | C45H76NO8P |
| PE(18:3_16:0) | GP | PE | 712.491732 | 713.499556 | [M-H]- | C39H72NO8P |
| PE(18:3_18:1) | GP | PE | 738.507383 | 739.515206 | [M-H]- | C41H74NO8P |
| PE(19:0_18:2) | GP | PE | 756.55396 | 757.562156 | [M-H]- | C42H80NO8P |
| PE(19:0_20:4) | GP | PE | 780.55957 | 781.562156 | [M-H]- | C44H80NO8P |
| PE(20:1_18:2) | GP | PE | 768.554333 | 769.562156 | [M-H]- | C43H80NO8P |
| PE(20:1_20:5) | GP | PE | 790.5386855 | 791.5465055 | [M-H]- | C45H78NO8P |
| PE(20:2_16:0) | GP | PE | 742.538683 | 743.546506 | [M-H]- | C41H78NO8P |
| PE(20:2_18:3) | GP | PE | 764.5230354 | 765.5308554 | [M-H]- | C43H76NO8P |
| PE(20:2_20:4) | GP | PE | 790.5386855 | 791.5465055 | [M-H]- | C45H78NO8P |
| PE(20:2_20:5) | GP | PE | 788.5230354 | 789.5308554 | [M-H]- | C45H76NO8P |
| PE(20:2_22:5) | GP | PE | 816.5543355 | 817.5621555 | [M-H]- | C47H80NO8P |
| PE(20:2_22:6) | GP | PE | 814.5386855 | 815.5465055 | [M-H]- | C47H78NO8P |
| PE(20:3_18:0) | GP | PE | 768.554333 | 769.562156 | [M-H]- | C43H80NO8P |
| PE(20:3_22:6) | GP | PE | 812.5230354 | 813.5308554 | [M-H]- | C47H76NO8P |
| PE(20:4_20:4) | GP | PE | 786.5073853 | 787.5152053 | [M-H]- | C45H74NO8P |
| PE(20:5_18:1) | GP | PE | 762.507383 | 763.515206 | [M-H]- | C43H74NO8P |
| PE(22:2_22:5) | GP | PE | 844.5856357 | 845.5934557 | [M-H]- | C49H84NO8P |
| PE(22:3_20:4) | GP | PE | 816.5543355 | 817.5621555 | [M-H]- | C47H80NO8P |
| PE(22:6_16:0) | GP | PE | 762.507383 | 763.515206 | [M-H]- | C43H74NO8P |
| PE(22:6_18:0) | GP | PE | 790.538683 | 791.546506 | [M-H]- | C45H78NO8P |
| PE(22:6_18:1) | GP | PE | 788.523033 | 789.530856 | [M-H]- | C45H76NO8P |
| PE(22:6_18:2) | GP | PE | 786.507382 | 787.515206 | [M-H]- | C45H74NO8P |
| PE(22:6_20:1) | GP | PE | 816.554333 | 817.562156 | [M-H]- | C47H80NO8P |
| PE(24:0_18:1) | GP | PE | 828.648233 | 829.656056 | [M-H]- | C47H92NO8P |
| PE(O-15:1_20:4) | GP | PE-O | 708.496816 | 709.504641 | [M-H]- | C40H72NO7P |
| PE(O-16:0_18:1) | GP | PE-O | 702.543766 | 703.551591 | [M-H]- | C39H78NO7P |
| PE(O-16:0_18:2) | GP | PE-O | 700.528116 | 701.535941 | [M-H]- | C39H76NO7P |
| PE(O-16:0_20:3) | GP | PE-O | 726.543766 | 727.551591 | [M-H]- | C41H78NO7P |
| PE(O-16:0_20:4) | GP | PE-O | 724.528116 | 725.535941 | [M-H]- | C41H76NO7P |
| PE(O-16:0_20:5) | GP | PE-O | 722.512466 | 723.520291 | [M-H]- | C41H74NO7P |
| PE(O-16:0_22:4) | GP | PE-O | 752.559416 | 753.567241 | [M-H]- | C43H80NO7P |
| PE(O-16:0_22:5) | GP | PE-O | 750.543766 | 751.551591 | [M-H]- | C43H78NO7P |
| PE(O-16:0_22:6) | GP | PE-O | 748.528116 | 749.535941 | [M-H]- | C43H76NO7P |
| PE(O-16:1_16:0) | GP | PE-O | 674.512466 | 675.520291 | [M-H]- | C37H74NO7P |
| PE(O-16:1_16:1) | GP | PE-O | 672.496816 | 673.504641 | [M-H]- | C37H72NO7P |
| PE(O-16:1_20:3) | GP | PE-O | 724.528116 | 725.535941 | [M-H]- | C41H76NO7P |
| PE(O-16:1_20:4) | GP | PE-O | 722.512466 | 723.520291 | [M-H]- | C41H74NO7P |
| PE(O-16:1_20:5) | GP | PE-O | 720.496816 | 721.504641 | [M-H]- | C41H72NO7P |
| PE(O-16:1_22:1) | GP | PE-O | 756.590716 | 757.598541 | [M-H]- | C43H84NO7P |
| PE(O-16:1_22:5) | GP | PE-O | 748.528116 | 749.535941 | [M-H]- | C43H76NO7P |
| PE(O-16:1_22:6) | GP | PE-O | 746.512466 | 747.520291 | [M-H]- | C43H74NO7P |
| PE(O-16:2_20:4) | GP | PE-O | 720.496816 | 721.504641 | [M-H]- | C41H72NO7P |
| PE(O-17:1_18:1) | GP | PE-O | 714.543766 | 715.551591 | [M-H]- | C40H78NO7P |
| PE(O-17:1_18:2) | GP | PE-O | 712.528116 | 713.535941 | [M-H]- | C40H76NO7P |
| PE(O-17:1_20:4) | GP | PE-O | 736.528116 | 737.535941 | [M-H]- | C42H76NO7P |
| PE(O-17:1_20:5) | GP | PE-O | 734.512466 | 735.520291 | [M-H]- | C42H74NO7P |
| PE(O-17:1_22:4) | GP | PE-O | 764.559416 | 765.567241 | [M-H]- | C44H80NO7P |
| PE(O-17:1_22:5) | GP | PE-O | 762.543766 | 763.551591 | [M-H]- | C44H78NO7P |
| PE(O-17:1_22:6) | GP | PE-O | 760.528116 | 761.535941 | [M-H]- | C44H76NO7P |
| PE(O-17:2_20:4) | GP | PE-O | 734.512466 | 735.520291 | [M-H]- | C42H74NO7P |
| PE(O-18:0_18:2) | GP | PE-O | 728.559416 | 729.567241 | [M-H]- | C41H80NO7P |
| PE(O-18:0_20:1) | GP | PE-O | 758.606366 | 759.614191 | [M-H]- | C43H86NO7P |
| PE(O-18:0_20:3) | GP | PE-O | 754.575066 | 755.582891 | [M-H]- | C43H82NO7P |
| PE(O-18:0_20:4) | GP | PE-O | 752.559416 | 753.567241 | [M-H]- | C43H80NO7P |
| PE(O-18:0_20:5) | GP | PE-O | 750.543766 | 751.551591 | [M-H]- | C43H78NO7P |
| PE(O-18:0_22:5) | GP | PE-O | 778.575066 | 779.582891 | [M-H]- | C45H82NO7P |
| PE(O-18:0_22:6) | GP | PE-O | 776.559416 | 777.567241 | [M-H]- | C45H80NO7P |
| PE(O-18:1_20:1) | GP | PE-O | 756.590716 | 757.598541 | [M-H]- | C43H84NO7P |
| PE(O-18:1_20:3) | GP | PE-O | 752.559416 | 753.567241 | [M-H]- | C43H80NO7P |
| PE(O-18:1_22:1) | GP | PE-O | 784.622016 | 785.629841 | [M-H]- | C45H88NO7P |
| PE(O-18:1_22:2) | GP | PE-O | 782.606366 | 783.614191 | [M-H]- | C45H86NO7P |
| PE(O-18:1_22:4) | GP | PE-O | 778.575066 | 779.582891 | [M-H]- | C45H82NO7P |
| PE(O-18:1_22:5) | GP | PE-O | 776.559416 | 777.567241 | [M-H]- | C45H80NO7P |
| PE(O-18:1_22:6) | GP | PE-O | 774.543766 | 775.551591 | [M-H]- | C45H78NO7P |
| PE(O-18:1_24:5) | GP | PE-O | 804.590716 | 805.598541 | [M-H]- | C47H84NO7P |
| PE(O-18:2_18:2) | GP | PE-O | 724.528116 | 725.535941 | [M-H]- | C41H76NO7P |
| PE(O-18:2_20:4) | GP | PE-O | 748.528116 | 749.535941 | [M-H]- | C43H76NO7P |
| PE(O-18:2_20:5) | GP | PE-O | 746.512466 | 747.520291 | [M-H]- | C43H74NO7P |
| PE(O-18:2_22:3) | GP | PE-O | 778.575066 | 779.582891 | [M-H]- | C45H82NO7P |
| PE(O-18:2_22:5) | GP | PE-O | 774.543766 | 775.551591 | [M-H]- | C45H78NO7P |
| PE(O-18:2_22:6) | GP | PE-O | 772.528116 | 773.535941 | [M-H]- | C45H76NO7P |
| PE(O-18:3_18:1) | GP | PE-O | 724.528116 | 725.535941 | [M-H]- | C41H76NO7P |
| PE(O-18:3_18:2) | GP | PE-O | 722.512466 | 723.520291 | [M-H]- | C41H74NO7P |
| PE(O-18:3_20:4) | GP | PE-O | 746.512466 | 747.520291 | [M-H]- | C43H74NO7P |
| PE(O-18:3_20:5) | GP | PE-O | 744.496816 | 745.504641 | [M-H]- | C43H72NO7P |
| PE(O-20:0_16:0) | GP | PE-O | 732.590716 | 733.598541 | [M-H]- | C41H84NO7P |
| PE(O-20:0_18:1) | GP | PE-O | 758.606366 | 759.614191 | [M-H]- | C43H86NO7P |
| PE(O-20:0_22:4) | GP | PE-O | 808.622016 | 809.629841 | [M-H]- | C47H88NO7P |
| PE(O-20:0_22:6) | GP | PE-O | 804.590716 | 805.598541 | [M-H]- | C47H84NO7P |
| PE(O-20:1_18:1) | GP | PE-O | 756.590716 | 757.598541 | [M-H]- | C43H84NO7P |
| PE(O-20:1_20:1) | GP | PE-O | 784.622016 | 785.629841 | [M-H]- | C45H88NO7P |
| PE(O-20:1_22:4) | GP | PE-O | 806.606366 | 807.614191 | [M-H]- | C47H86NO7P |
| PE(O-20:1_22:5) | GP | PE-O | 804.590716 | 805.598541 | [M-H]- | C47H84NO7P |
| PE(O-20:2_22:6) | GP | PE-O | 800.559416 | 801.567241 | [M-H]- | C47H80NO7P |
| PE(O-20:3_20:4) | GP | PE-O | 774.543766 | 775.551591 | [M-H]- | C45H78NO7P |
| PE(O-22:0_18:2) | GP | PE-O | 784.622016 | 785.629841 | [M-H]- | C45H88NO7P |
| PE(O-22:0_22:6) | GP | PE-O | 832.622016 | 833.629841 | [M-H]- | C49H88NO7P |
| PE(O-22:1_18:1) | GP | PE-O | 784.622016 | 785.629841 | [M-H]- | C45H88NO7P |
| PE(O-22:1_18:2) | GP | PE-O | 782.606366 | 783.614191 | [M-H]- | C45H86NO7P |
| PE(O-22:1_20:3) | GP | PE-O | 808.622016 | 809.629841 | [M-H]- | C47H88NO7P |
| PE(O-22:1_20:4) | GP | PE-O | 806.606366 | 807.614191 | [M-H]- | C47H86NO7P |
| PE(O-22:2_20:5) | GP | PE-O | 802.575066 | 803.582891 | [M-H]- | C47H82NO7P |
| PE(O-24:1_18:2) | GP | PE-O | 810.637666 | 811.645491 | [M-H]- | C47H90NO7P |
| PE(O-24:1_20:4) | GP | PE-O | 834.637666 | 835.645491 | [M-H]- | C49H90NO7P |
| PE(O-24:1_22:6) | GP | PE-O | 858.637666 | 859.645491 | [M-H]- | C51H90NO7P |
| PE(O-24:2_18:1) | GP | PE-O | 810.637666 | 811.645491 | [M-H]- | C47H90NO7P |
| PE(P-14:0_20:4) | GP | PE-P | 696.496816 | 695.488991 | [M+H]+ | C39H70NO7P |
| PE(P-14:0_22:6) | GP | PE-P | 720.496816 | 719.488991 | [M+H]+ | C41H70NO7P |
| PE(P-16:0_16:0) | GP | PE-P | 676.528116 | 675.520291 | [M+H]+ | C37H74NO7P |
| PE(P-16:0_16:1) | GP | PE-P | 674.512466 | 673.504641 | [M+H]+ | C37H72NO7P |
| PE(P-16:0_18:1) | GP | PE-P | 702.543766 | 701.535941 | [M+H]+ | C39H76NO7P |
| PE(P-16:0_18:2) | GP | PE-P | 700.528116 | 699.520291 | [M+H]+ | C39H74NO7P |
| PE(P-16:0_18:3) | GP | PE-P | 698.512466 | 697.504641 | [M+H]+ | C39H72NO7P |
| PE(P-16:0_20:2) | GP | PE-P | 728.559416 | 727.551591 | [M+H]+ | C41H78NO7P |
| PE(P-16:0_20:3) | GP | PE-P | 726.543766 | 725.535941 | [M+H]+ | C41H76NO7P |
| PE(P-16:0_20:4) | GP | PE-P | 724.528116 | 723.520291 | [M+H]+ | C41H74NO7P |
| PE(P-16:0_20:5) | GP | PE-P | 722.512466 | 721.504641 | [M+H]+ | C41H72NO7P |
| PE(P-16:0_22:3) | GP | PE-P | 754.575066 | 753.567241 | [M+H]+ | C43H80NO7P |
| PE(P-16:0_22:4) | GP | PE-P | 752.559416 | 751.551591 | [M+H]+ | C43H78NO7P |
| PE(P-16:0_22:5) | GP | PE-P | 750.543766 | 749.535941 | [M+H]+ | C43H76NO7P |
| PE(P-16:0_22:6) | GP | PE-P | 748.528116 | 747.520291 | [M+H]+ | C43H74NO7P |
| PE(P-16:0_24:4) | GP | PE-P | 780.590716 | 779.582891 | [M+H]+ | C45H82NO7P |
| PE(P-16:0_24:5) | GP | PE-P | 778.575066 | 777.567241 | [M+H]+ | C45H80NO7P |
| PE(P-16:1_20:4) | GP | PE-P | 722.512466 | 721.504641 | [M+H]+ | C41H72NO7P |
| PE(P-16:1_22:2) | GP | PE-P | 754.575066 | 753.567241 | [M+H]+ | C43H80NO7P |
| PE(P-17:0_18:1) | GP | PE-P | 716.559416 | 715.551591 | [M+H]+ | C40H78NO7P |
| PE(P-17:0_20:4) | GP | PE-P | 738.543766 | 737.535941 | [M+H]+ | C42H76NO7P |
| PE(P-17:0_22:4) | GP | PE-P | 766.575066 | 765.567241 | [M+H]+ | C44H80NO7P |
| PE(P-17:0_22:5) | GP | PE-P | 764.559416 | 763.551591 | [M+H]+ | C44H78NO7P |
| PE(P-17:0_22:6) | GP | PE-P | 762.543766 | 761.535941 | [M+H]+ | C44H76NO7P |
| PE(P-18:0_18:1) | GP | PE-P | 730.575066 | 729.567241 | [M+H]+ | C41H80NO7P |
| PE(P-18:0_18:2) | GP | PE-P | 728.559416 | 727.551591 | [M+H]+ | C41H78NO7P |
| PE(P-18:0_20:1) | GP | PE-P | 758.606366 | 757.598541 | [M+H]+ | C43H84NO7P |
| PE(P-18:0_20:3) | GP | PE-P | 754.575066 | 753.567241 | [M+H]+ | C43H80NO7P |
| PE(P-18:0_20:4) | GP | PE-P | 752.559416 | 751.551591 | [M+H]+ | C43H78NO7P |
| PE(P-18:0_20:5) | GP | PE-P | 750.543766 | 749.535941 | [M+H]+ | C43H76NO7P |
| PE(P-18:0_22:4) | GP | PE-P | 780.590716 | 779.582891 | [M+H]+ | C45H82NO7P |
| PE(P-18:0_22:5) | GP | PE-P | 778.575066 | 777.567241 | [M+H]+ | C45H80NO7P |
| PE(P-18:0_22:6) | GP | PE-P | 776.559416 | 775.551591 | [M+H]+ | C45H78NO7P |
| PE(P-18:1_16:1) | GP | PE-P | 700.528116 | 699.520291 | [M+H]+ | C39H74NO7P |
| PE(P-18:1_18:1) | GP | PE-P | 728.559416 | 727.551591 | [M+H]+ | C41H78NO7P |
| PE(P-18:1_18:2) | GP | PE-P | 726.543766 | 725.535941 | [M+H]+ | C41H76NO7P |
| PE(P-18:1_20:1) | GP | PE-P | 756.590716 | 755.582891 | [M+H]+ | C43H82NO7P |
| PE(P-18:1_20:2) | GP | PE-P | 754.575066 | 753.567241 | [M+H]+ | C43H80NO7P |
| PE(P-18:1_20:3) | GP | PE-P | 752.559416 | 751.551591 | [M+H]+ | C43H78NO7P |
| PE(P-18:1_20:4) | GP | PE-P | 750.543766 | 749.535941 | [M+H]+ | C43H76NO7P |
| PE(P-18:1_20:5) | GP | PE-P | 748.528116 | 747.520291 | [M+H]+ | C43H74NO7P |
| PE(P-18:1_22:4) | GP | PE-P | 778.575066 | 777.567241 | [M+H]+ | C45H80NO7P |
| PE(P-18:1_22:5) | GP | PE-P | 776.559416 | 775.551591 | [M+H]+ | C45H78NO7P |
| PE(P-18:1_22:6) | GP | PE-P | 774.543766 | 773.535941 | [M+H]+ | C45H76NO7P |
| PE(P-18:2_18:1) | GP | PE-P | 726.543766 | 725.535941 | [M+H]+ | C41H76NO7P |
| PE(P-18:2_18:2) | GP | PE-P | 724.528116 | 723.520291 | [M+H]+ | C41H74NO7P |
| PE(P-18:2_20:2) | GP | PE-P | 752.559416 | 751.551591 | [M+H]+ | C43H78NO7P |
| PE(P-18:2_20:4) | GP | PE-P | 748.528116 | 747.520291 | [M+H]+ | C43H74NO7P |
| PE(P-18:2_20:5) | GP | PE-P | 746.512466 | 745.504641 | [M+H]+ | C43H72NO7P |
| PE(P-18:2_22:5) | GP | PE-P | 774.543766 | 773.535941 | [M+H]+ | C45H76NO7P |
| PE(P-18:2_22:6) | GP | PE-P | 772.528116 | 771.520291 | [M+H]+ | C45H74NO7P |
| PE(P-18:3_20:4) | GP | PE-P | 746.512466 | 745.504641 | [M+H]+ | C43H72NO7P |
| PE(P-19:0_20:4) | GP | PE-P | 766.575066 | 765.567241 | [M+H]+ | C44H80NO7P |
| PE(P-20:0_18:1) | GP | PE-P | 758.606366 | 757.598541 | [M+H]+ | C43H84NO7P |
| PE(P-20:0_22:5) | GP | PE-P | 806.606366 | 805.598541 | [M+H]+ | C47H84NO7P |
| PE(P-20:1_18:2) | GP | PE-P | 754.575066 | 753.567241 | [M+H]+ | C43H80NO7P |
| PE(P-20:1_22:6) | GP | PE-P | 802.575066 | 801.567241 | [M+H]+ | C47H80NO7P |
| PE(P-20:2_22:4) | GP | PE-P | 804.590716 | 803.582891 | [M+H]+ | C47H82NO7P |
| PE(P-20:2_22:6) | GP | PE-P | 800.559416 | 799.551591 | [M+H]+ | C47H78NO7P |
| PE(P-20:3_20:4) | GP | PE-P | 774.543766 | 773.535941 | [M+H]+ | C45H76NO7P |
| PE(P-22:1_20:4) | GP | PE-P | 806.606366 | 805.598541 | [M+H]+ | C47H84NO7P |
| PE(P-22:1_22:6) | GP | PE-P | 830.606366 | 829.598541 | [M+H]+ | C49H84NO7P |
| PE(P-24:1_18:1) | GP | PE-P | 812.653316 | 811.645491 | [M+H]+ | C47H90NO7P |
| PE(P-24:1_18:2) | GP | PE-P | 810.637666 | 809.629841 | [M+H]+ | C47H88NO7P |
| PE(P-24:2_18:2) | GP | PE-P | 808.622016 | 807.614191 | [M+H]+ | C47H86NO7P |
| PG(10:0_14:0) | GP | PG | 609.3767651 | 610.3845851 | [M-H]- | C30H59O10P |
| PG(12:0_14:1) | GP | PG | 635.3924152 | 636.4002352 | [M-H]- | C32H61O10P |
| PG(12:0_15:0) | GP | PG | 651.4237153 | 652.4315353 | [M-H]- | C33H65O10P |
| PG(12:0_16:1) | GP | PG | 663.4237153 | 664.4315353 | [M-H]- | C34H65O10P |
| PG(12:0_17:1) | GP | PG | 677.4393654 | 678.4471854 | [M-H]- | C35H67O10P |
| PG(12:0_18:1) | GP | PG | 691.4550154 | 692.4628354 | [M-H]- | C36H69O10P |
| PG(12:0_22:5) | GP | PG | 739.4550154 | 740.4628354 | [M-H]- | C40H69O10P |
| PG(13:0_13:1) | GP | PG | 635.3924152 | 636.4002352 | [M-H]- | C32H61O10P |
| PG(14:0_20:5) | GP | PG | 739.4550154 | 740.4628354 | [M-H]- | C40H69O10P |
| PG(15:0_22:0) | GP | PG | 791.5802159 | 792.5880359 | [M-H]- | C43H85O10P |
| PG(16:0_16:0) | GP | PG | 721.509789 | 722.509787 | [M-H]- | C38H75O10P |
| PG(16:0_16:2) | GP | PG | 717.4706655 | 718.4784855 | [M-H]- | C38H71O10P |
| PG(16:0_18:1) | GP | PG | 747.525439 | 748.525437 | [M-H]- | C40H77O10P |
| PG(16:0_18:3) | GP | PG | 743.4863155 | 744.4941355 | [M-H]- | C40H73O10P |
| PG(16:0_19:0) | GP | PG | 763.5489158 | 764.5567358 | [M-H]- | C41H81O10P |
| PG(16:0_20:0) | GP | PG | 777.5645659 | 778.5723859 | [M-H]- | C42H83O10P |
| PG(16:0_20:5) | GP | PG | 767.4863155 | 768.4941355 | [M-H]- | C42H73O10P |
| PG(16:0_21:0) | GP | PG | 791.5802159 | 792.5880359 | [M-H]- | C43H85O10P |
| PG(16:0_22:0) | GP | PG | 805.595866 | 806.603686 | [M-H]- | C44H87O10P |
| PG(16:0_22:1) | GP | PG | 803.5802159 | 804.5880359 | [M-H]- | C44H85O10P |
| PG(16:0_24:0) | GP | PG | 833.6271661 | 834.6349861 | [M-H]- | C46H91O10P |
| PG(16:0_24:1) | GP | PG | 831.6115161 | 832.6193361 | [M-H]- | C46H89O10P |
| PG(16:1_16:1) | GP | PG | 717.478489 | 718.478487 | [M-H]- | C38H71O10P |
| PG(16:1_17:1) | GP | PG | 731.4863155 | 732.4941355 | [M-H]- | C39H73O10P |
| PG(16:1_18:3) | GP | PG | 741.4706655 | 742.4784855 | [M-H]- | C40H71O10P |
| PG(16:1_20:3) | GP | PG | 769.5019656 | 770.5097856 | [M-H]- | C42H75O10P |
| PG(16:1_20:5) | GP | PG | 765.4706655 | 766.4784855 | [M-H]- | C42H71O10P |
| PG(17:0_18:0) | GP | PG | 763.5489158 | 764.5567358 | [M-H]- | C41H81O10P |
| PG(17:0_19:0) | GP | PG | 777.5645659 | 778.5723859 | [M-H]- | C42H83O10P |
| PG(17:0_22:1) | GP | PG | 817.595866 | 818.603686 | [M-H]- | C45H87O10P |
| PG(18:0_16:1) | GP | PG | 747.5176157 | 748.5254357 | [M-H]- | C40H77O10P |
| PG(18:0_18:0) | GP | PG | 777.57709 | 778.572387 | [M-H]- | C42H83O10P |
| PG(18:0_18:1) | GP | PG | 775.556739 | 776.556737 | [M-H]- | C42H81O10P |
| PG(18:0_18:2) | GP | PG | 773.541089 | 774.541087 | [M-H]- | C42H79O10P |
| PG(18:0_19:0) | GP | PG | 791.5802159 | 792.5880359 | [M-H]- | C43H85O10P |
| PG(18:0_22:1) | GP | PG | 831.6115161 | 832.6193361 | [M-H]- | C46H89O10P |
| PG(18:0_24:0) | GP | PG | 861.6584663 | 862.6662863 | [M-H]- | C48H95O10P |
| PG(18:0_24:2) | GP | PG | 857.6271661 | 858.6349861 | [M-H]- | C48H91O10P |
| PG(18:1_16:1) | GP | PG | 745.509789 | 746.509787 | [M-H]- | C40H75O10P |
| PG(18:1_18:1) | GP | PG | 773.541089 | 774.541087 | [M-H]- | C42H79O10P |
| PG(18:1_18:3) | GP | PG | 769.5019656 | 770.5097856 | [M-H]- | C42H75O10P |
| PG(18:1_20:2) | GP | PG | 799.556739 | 800.556737 | [M-H]- | C44H81O10P |
| PG(18:1_21:1) | GP | PG | 815.5802159 | 816.5880359 | [M-H]- | C45H85O10P |
| PG(18:1_21:2) | GP | PG | 813.5645659 | 814.5723859 | [M-H]- | C45H83O10P |
| PG(18:2_16:0) | GP | PG | 745.509789 | 746.509787 | [M-H]- | C40H75O10P |
| PG(18:2_18:1) | GP | PG | 771.525439 | 772.525437 | [M-H]- | C42H77O10P |
| PG(18:2_18:2) | GP | PG | 769.509789 | 770.509787 | [M-H]- | C42H75O10P |
| PG(18:2_18:3) | GP | PG | 767.494139 | 768.494137 | [M-H]- | C42H73O10P |
| PG(18:2_20:4) | GP | PG | 793.5019656 | 794.5097856 | [M-H]- | C44H75O10P |
| PG(18:2_21:2) | GP | PG | 811.5489158 | 812.5567358 | [M-H]- | C45H81O10P |
| PG(18:2_22:5) | GP | PG | 819.5176157 | 820.5254357 | [M-H]- | C46H77O10P |
| PG(19:0_15:1) | GP | PG | 747.5176157 | 748.5254357 | [M-H]- | C40H77O10P |
| PG(19:0_20:3) | GP | PG | 813.5645659 | 814.5723859 | [M-H]- | C45H83O10P |
| PG(19:0_20:4) | GP | PG | 811.5489158 | 812.5567358 | [M-H]- | C45H81O10P |
| PG(19:0_22:6) | GP | PG | 835.5489158 | 836.5567358 | [M-H]- | C47H81O10P |
| PG(19:2_20:4) | GP | PG | 807.5176157 | 808.5254357 | [M-H]- | C45H77O10P |
| PG(20:0_20:4) | GP | PG | 825.5645659 | 826.5723859 | [M-H]- | C46H83O10P |
| PG(20:0_22:0) | GP | PG | 861.6584663 | 862.6662863 | [M-H]- | C48H95O10P |
| PG(20:0_22:6) | GP | PG | 849.5645659 | 850.5723859 | [M-H]- | C48H83O10P |
| PG(20:1_18:1) | GP | PG | 801.572389 | 802.572387 | [M-H]- | C44H83O10P |
| PG(20:1_18:2) | GP | PG | 799.5489158 | 800.5567358 | [M-H]- | C44H81O10P |
| PG(20:1_22:1) | GP | PG | 857.6271661 | 858.6349861 | [M-H]- | C48H91O10P |
| PG(20:4_20:4) | GP | PG | 817.5019656 | 818.5097856 | [M-H]- | C46H75O10P |
| PG(20:4_22:6) | GP | PG | 841.5019656 | 842.5097856 | [M-H]- | C48H75O10P |
| PG(21:0_18:2) | GP | PG | 815.5802159 | 816.5880359 | [M-H]- | C45H85O10P |
| PG(21:0_20:4) | GP | PG | 839.5802159 | 840.5880359 | [M-H]- | C47H85O10P |
| PG(21:1_18:2) | GP | PG | 813.5645659 | 814.5723859 | [M-H]- | C45H83O10P |
| PG(21:1_20:4) | GP | PG | 837.5645659 | 838.5723859 | [M-H]- | C47H83O10P |
| PG(22:0_16:1) | GP | PG | 803.5802159 | 804.5880359 | [M-H]- | C44H85O10P |
| PG(22:0_18:1) | GP | PG | 831.6115161 | 832.6193361 | [M-H]- | C46H89O10P |
| PG(22:0_20:2) | GP | PG | 857.6271661 | 858.6349861 | [M-H]- | C48H91O10P |
| PG(22:0_20:3) | GP | PG | 855.6115161 | 856.6193361 | [M-H]- | C48H89O10P |
| PG(22:0_20:4) | GP | PG | 853.595866 | 854.603686 | [M-H]- | C48H87O10P |
| PG(22:0_20:5) | GP | PG | 851.5802159 | 852.5880359 | [M-H]- | C48H85O10P |
| PG(22:0_22:4) | GP | PG | 881.6271661 | 882.6349861 | [M-H]- | C50H91O10P |
| PG(22:0_22:6) | GP | PG | 877.595866 | 878.603686 | [M-H]- | C50H87O10P |
| PG(22:6_22:6) | GP | PG | 865.5019656 | 866.5097856 | [M-H]- | C50H75O10P |
| PG(24:0_18:2) | GP | PG | 857.6271661 | 858.6349861 | [M-H]- | C48H91O10P |
| PG(24:0_20:4) | GP | PG | 881.6271661 | 882.6349861 | [M-H]- | C50H91O10P |
| PG(9:0_22:4) | GP | PG | 699.4237153 | 700.4315353 | [M-H]- | C37H65O10P |
| PGE2 | FA | Eicosanoid | 351.217151 | 352.2249741 | [M-H]- | C20H32O5 |
| PGF1α | FA | Eicosanoid | 355.24845 | 356.2563 | [M-H]- | C20H36O5 |
| PI(10:0_12:0) | GP | PI | 669.361509 | 670.369329 | [M-H]- | C31H59O13P |
| PI(10:0_16:0) | GP | PI | 725.4241092 | 726.4319292 | [M-H]- | C35H67O13P |
| PI(12:0_13:0) | GP | PI | 711.4084592 | 712.4162792 | [M-H]- | C34H65O13P |
| PI(12:0_13:1) | GP | PI | 709.3928091 | 710.4006291 | [M-H]- | C34H63O13P |
| PI(12:0_18:0) | GP | PI | 781.4867095 | 782.4945295 | [M-H]- | C39H75O13P |
| PI(12:0_18:1) | GP | PI | 779.4710594 | 780.4788794 | [M-H]- | C39H73O13P |
| PI(12:0_22:4) | GP | PI | 829.4867095 | 830.4945295 | [M-H]- | C43H75O13P |
| PI(13:0_18:2) | GP | PI | 791.4710594 | 792.4788794 | [M-H]- | C40H73O13P |
| PI(13:1_18:1) | GP | PI | 791.4710594 | 792.4788794 | [M-H]- | C40H73O13P |
| PI(14:0_19:0) | GP | PI | 823.5336597 | 824.5414797 | [M-H]- | C42H81O13P |
| PI(14:1_18:1) | GP | PI | 805.4867095 | 806.4945295 | [M-H]- | C41H75O13P |
| PI(14:1_24:2) | GP | PI | 887.5649598 | 888.5727798 | [M-H]- | C47H85O13P |
| PI(15:0_17:1) | GP | PI | 807.5023595 | 808.5101795 | [M-H]- | C41H77O13P |
| PI(15:0_18:2) | GP | PI | 819.5023595 | 820.5101795 | [M-H]- | C42H77O13P |
| PI(15:0_19:1) | GP | PI | 835.5336597 | 836.5414797 | [M-H]- | C43H81O13P |
| PI(15:0_19:2) | GP | PI | 833.5180096 | 834.5258296 | [M-H]- | C43H79O13P |
| PI(15:0_20:2) | GP | PI | 847.5336597 | 848.5414797 | [M-H]- | C44H81O13P |
| PI(15:0_21:0) | GP | PI | 865.5806099 | 866.5884299 | [M-H]- | C45H87O13P |
| PI(15:0_21:1) | GP | PI | 863.5649598 | 864.5727798 | [M-H]- | C45H85O13P |
| PI(15:0_22:4) | GP | PI | 871.5336597 | 872.5414797 | [M-H]- | C46H81O13P |
| PI(15:1_20:4) | GP | PI | 841.4867095 | 842.4945295 | [M-H]- | C44H75O13P |
| PI(16:0_16:0) | GP | PI | 809.5180096 | 810.5258296 | [M-H]- | C41H79O13P |
| PI(16:0_16:1) | GP | PI | 807.510184 | 808.510182 | [M-H]- | C41H77O13P |
| PI(16:0_18:0) | GP | PI | 837.557134 | 838.557132 | [M-H]- | C43H83O13P |
| PI(16:0_18:1) | GP | PI | 835.541484 | 836.541482 | [M-H]- | C43H81O13P |
| PI(16:0_18:3) | GP | PI | 831.5023595 | 832.5101795 | [M-H]- | C43H77O13P |
| PI(16:0_19:0) | GP | PI | 851.5649598 | 852.5727798 | [M-H]- | C44H85O13P |
| PI(16:0_20:3) | GP | PI | 859.541484 | 860.541482 | [M-H]- | C45H81O13P |
| PI(16:0_20:4) | GP | PI | 857.525834 | 858.525832 | [M-H]- | C45H79O13P |
| PI(16:0_22:4) | GP | PI | 885.5493097 | 886.5571297 | [M-H]- | C47H83O13P |
| PI(16:0_22:6) | GP | PI | 881.525834 | 882.525832 | [M-H]- | C47H79O13P |
| PI(16:1_18:1) | GP | PI | 833.525834 | 834.525832 | [M-H]- | C43H79O13P |
| PI(17:0_18:0) | GP | PI | 851.5649598 | 852.5727798 | [M-H]- | C44H85O13P |
| PI(17:0_18:2) | GP | PI | 847.533658 | 848.541482 | [M-H]- | C44H81O13P |
| PI(17:0_20.4) | GP | PI | 871.53424 | 872.541482 | [M-H]- | C46H81O13P |
| PI(17:1_18:1) | GP | PI | 847.533658 | 848.541482 | [M-H]- | C44H81O13P |
| PI(18:0_13:1) | GP | PI | 793.4867095 | 794.4945295 | [M-H]- | C40H75O13P |
| PI(18:0_14:1) | GP | PI | 807.5023595 | 808.5101795 | [M-H]- | C41H77O13P |
| PI(18:0_18:0) | GP | PI | 865.588434 | 866.588432 | [M-H]- | C45H87O13P |
| PI(18:0_18:1) | GP | PI | 863.572784 | 864.572782 | [M-H]- | C45H85O13P |
| PI(18:0_18:2) | GP | PI | 861.557134 | 862.557132 | [M-H]- | C45H83O13P |
| PI(18:0_19:0) | GP | PI | 879.5962599 | 880.6040799 | [M-H]- | C46H89O13P |
| PI(18:0_20:0) | GP | PI | 893.61191 | 894.61973 | [M-H]- | C47H91O13P |
| PI(18:0_20:2) | GP | PI | 889.588434 | 890.588432 | [M-H]- | C47H87O13P |
| PI(18:0_20:3) | GP | PI | 887.5649598 | 888.5727798 | [M-H]- | C47H85O13P |
| PI(18:0_20:4) | GP | PI | 885.557134 | 886.557132 | [M-H]- | C47H83O13P |
| PI(18:0_22:2) | GP | PI | 917.60541 | 918.619732 | [M-H]- | C49H91O13P |
| PI(18:0_22:4) | GP | PI | 913.588434 | 914.588432 | [M-H]- | C49H87O13P |
| PI(18:0_22:5) | GP | PI | 911.572784 | 912.572782 | [M-H]- | C49H85O13P |
| PI(18:0_22:6) | GP | PI | 909.557134 | 910.557132 | [M-H]- | C49H83O13P |
| PI(18:1_17:2) | GP | PI | 845.5180096 | 846.5258296 | [M-H]- | C44H79O13P |
| PI(18:1_18:1) | GP | PI | 861.557134 | 862.557132 | [M-H]- | C45H83O13P |
| PI(18:1_18:2) | GP | PI | 859.541484 | 860.541482 | [M-H]- | C45H81O13P |
| PI(18:1_20:4) | GP | PI | 883.5336597 | 884.5414797 | [M-H]- | C47H81O13P |
| PI(18:1_22:6) | GP | PI | 907.541484 | 908.541482 | [M-H]- | C49H81O13P |
| PI(18:2_16:0) | GP | PI | 833.525834 | 834.525832 | [M-H]- | C43H79O13P |
| PI(18:2_18:2) | GP | PI | 857.525834 | 858.525832 | [M-H]- | C45H79O13P |
| PI(18:2_20:4) | GP | PI | 881.525834 | 882.525832 | [M-H]- | C47H79O13P |
| PI(18:3_16:0) | GP | PI | 831.510184 | 832.510182 | [M-H]- | C43H77O13P |
| PI(19:0_15:1) | GP | PI | 835.5336597 | 836.5414797 | [M-H]- | C43H81O13P |
| PI(19:0_16:1) | GP | PI | 849.5493097 | 850.5571297 | [M-H]- | C44H83O13P |
| PI(19:0_17:1) | GP | PI | 863.5649598 | 864.5727798 | [M-H]- | C45H85O13P |
| PI(19:0_17:2) | GP | PI | 861.5493097 | 862.5571297 | [M-H]- | C45H83O13P |
| PI(19:0_18:1) | GP | PI | 877.5806099 | 878.5884299 | [M-H]- | C46H87O13P |
| PI(19:0_20:4) | GP | PI | 899.564957 | 872.541482 | [M-H]- | C46H81O13P |
| PI(20:3_18:0) | GP | PI | 887.572784 | 888.572782 | [M-H]- | C47H85O13P |
| PI(20:4_18:1) | GP | PI | 883.541484 | 884.541482 | [M-H]- | C47H81O13P |
| PI(21:1_20:4) | GP | PI | 925.5806099 | 926.5884299 | [M-H]- | C50H87O13P |
| PMeOH(18:0_22:4) | GP | PMeOH | 765.543432 | 766.551257 | [M-H]- | C44H79O8P |
| PS(12:0_15:0) | GP | PS | 664.4189643 | 665.4267843 | [M-H]- | C33H64NO10P |
| PS(12:0_15:1) | GP | PS | 662.4033142 | 663.4111342 | [M-H]- | C33H62NO10P |
| PS(12:0_16:0) | GP | PS | 678.4346143 | 679.4424343 | [M-H]- | C34H66NO10P |
| PS(13:0_17:2) | GP | PS | 702.4346143 | 703.4424343 | [M-H]- | C36H66NO10P |
| PS(14:0_19:0) | GP | PS | 748.5128646 | 749.5206846 | [M-H]- | C39H76NO10P |
| PS(14:0_21:0) | GP | PS | 776.5441648 | 777.5519848 | [M-H]- | C41H80NO10P |
| PS(15:0_18:1) | GP | PS | 746.4972146 | 749.5206846 | [M-H]- | C39H76NO10P |
| PS(15:0_18:2) | GP | PS | 744.4815645 | 749.5206846 | [M-H]- | C39H76NO10P |
| PS(15:0_20:2) | GP | PS | 772.5128646 | 777.5519848 | [M-H]- | C41H80NO10P |
| PS(15:0_20:3) | GP | PS | 770.4972146 | 777.5519848 | [M-H]- | C41H80NO10P |
| PS(15:0_20:4) | GP | PS | 768.4815645 | 777.5519848 | [M-H]- | C41H80NO10P |
| PS(15:0_21:0) | GP | PS | 790.5598148 | 791.5676348 | [M-H]- | C42H82NO10P |
| PS(15:1_20:1) | GP | PS | 772.5128646 | 777.5519848 | [M-H]- | C41H80NO10P |
| PS(15:1_22:5) | GP | PS | 792.4815645 | 793.4893845 | [M-H]- | C43H72NO10P |
| PS(16:0_17:2) | GP | PS | 744.4815645 | 749.5206846 | [M-H]- | C39H76NO10P |
| PS(16:0_19:0) | GP | PS | 776.5441648 | 777.5519848 | [M-H]- | C41H80NO10P |
| PS(16:0_20:0) | GP | PS | 790.5598148 | 791.5676348 | [M-H]- | C42H82NO10P |
| PS(16:0_20:1) | GP | PS | 788.5441648 | 789.5519848 | [M-H]- | C42H80NO10P |
| PS(16:0_21:0) | GP | PS | 804.5754649 | 785.5206846 | [M-H]- | C42H76NO10P |
| PS(16:0_21:1) | GP | PS | 802.5598148 | 803.5676348 | [M-H]- | C43H82NO10P |
| PS(16:0_23:0) | GP | PS | 832.606765 | 817.5832849 | [M-H]- | C44H84NO10P |
| PS(16:0_24:0) | GP | PS | 846.6224151 | 829.5832849 | [M-H]- | C45H84NO10P |
| PS(17:0_18:0) | GP | PS | 776.5441648 | 777.5519848 | [M-H]- | C41H80NO10P |
| PS(17:0_18:1) | GP | PS | 774.5285147 | 777.5519848 | [M-H]- | C41H80NO10P |
| PS(17:0_21:0) | GP | PS | 818.591115 | 791.4737345 | [M-H]- | C43H70NO10P |
| PS(17:0_21:1) | GP | PS | 816.5754649 | 817.5832849 | [M-H]- | C44H84NO10P |
| PS(17:1_18:1) | GP | PS | 772.5128646 | 777.5519848 | [M-H]- | C41H80NO10P |
| PS(17:2_18:2) | GP | PS | 768.4815645 | 777.5519848 | [M-H]- | C41H80NO10P |
| PS(18:0_15:1) | GP | PS | 746.4972146 | 749.5206846 | [M-H]- | C39H76NO10P |
| PS(18:0_17:1) | GP | PS | 774.528511 | 775.536336 | [M-H]- | C41H78NO10P |
| PS(18:0_18:0) | GP | PS | 790.559811 | 791.567636 | [M-H]- | C42H82NO10P |
| PS(18:0_19:0) | GP | PS | 804.5754649 | 785.5206846 | [M-H]- | C42H76NO10P |
| PS(18:0_20:1) | GP | PS | 816.5754649 | 817.5832849 | [M-H]- | C44H84NO10P |
| PS(18:0_20:2) | GP | PS | 814.5598148 | 817.5832849 | [M-H]- | C44H84NO10P |
| PS(18:0_20:4) | GP | PS | 810.528511 | 811.536336 | [M-H]- | C44H78NO10P |
| PS(18:0_21:0) | GP | PS | 832.606765 | 817.5832849 | [M-H]- | C44H84NO10P |
| PS(18:0_21:1) | GP | PS | 830.591115 | 831.598935 | [M-H]- | C45H86NO10P |
| PS(18:0_22:0) | GP | PS | 846.6224151 | 829.5832849 | [M-H]- | C45H84NO10P |
| PS(18:0_22:1) | GP | PS | 844.606765 | 829.5832849 | [M-H]- | C45H84NO10P |
| PS(18:0_22:5) | GP | PS | 836.544161 | 837.551986 | [M-H]- | C46H80NO10P |
| PS(18:0_23:0) | GP | PS | 860.6380652 | 861.6458852 | [M-H]- | C47H92NO10P |
| PS(18:0_24:0) | GP | PS | 874.6537152 | 845.5206846 | [M-H]- | C47H76NO10P |
| PS(18:1_18:1) | GP | PS | 786.5285147 | 787.5363347 | [M-H]- | C42H78NO10P |
| PS(18:1_20:1) | GP | PS | 814.559811 | 815.567636 | [M-H]- | C44H82NO10P |
| PS(18:1_20:2) | GP | PS | 812.5441648 | 817.5832849 | [M-H]- | C44H84NO10P |
| PS(18:1_20:3) | GP | PS | 810.5285147 | 817.5832849 | [M-H]- | C44H84NO10P |
| PS(18:1_20:4) | GP | PS | 808.5128646 | 817.5832849 | [M-H]- | C44H84NO10P |
| PS(18:1_22:1) | GP | PS | 842.606761 | 843.614586 | [M-H]- | C46H86NO10P |
| PS(18:1_22:2) | GP | PS | 840.5754649 | 841.5832849 | [M-H]- | C46H84NO10P |
| PS(18:1_22:4) | GP | PS | 836.5441648 | 825.4580844 | [M-H]- | C46H68NO10P |
| PS(18:1_24:4) | GP | PS | 864.5754649 | 865.5832849 | [M-H]- | C48H84NO10P |
| PS(18:2_18:2) | GP | PS | 782.4972146 | 785.5206846 | [M-H]- | C42H76NO10P |
| PS(18:2_18:3) | GP | PS | 780.4815645 | 785.5206846 | [M-H]- | C42H76NO10P |
| PS(18:2_20:2) | GP | PS | 810.5285147 | 817.5832849 | [M-H]- | C44H84NO10P |
| PS(18:2_20:3) | GP | PS | 808.5128646 | 817.5832849 | [M-H]- | C44H84NO10P |
| PS(18:2_20:4) | GP | PS | 806.4972146 | 817.5832849 | [M-H]- | C44H84NO10P |
| PS(18:2_22:5) | GP | PS | 832.5128646 | 825.4580844 | [M-H]- | C46H68NO10P |
| PS(18:2_22:6) | GP | PS | 830.4972146 | 825.4580844 | [M-H]- | C46H68NO10P |
| PS(19:0_16:1) | GP | PS | 774.5285147 | 777.5519848 | [M-H]- | C41H80NO10P |
| PS(19:0_18:1) | GP | PS | 802.5598148 | 803.5676348 | [M-H]- | C43H82NO10P |
| PS(19:0_18:3) | GP | PS | 798.5285147 | 799.5363347 | [M-H]- | C43H78NO10P |
| PS(19:0_20:4) | GP | PS | 824.544161 | 825.551986 | [M-H]- | C45H80NO10P |
| PS(19:0_20:5) | GP | PS | 822.5285147 | 823.5363347 | [M-H]- | C45H78NO10P |
| PS(20:0_16:1) | GP | PS | 788.5441648 | 789.5519848 | [M-H]- | C42H80NO10P |
| PS(20:0_18:1) | GP | PS | 816.5754649 | 817.5832849 | [M-H]- | C44H84NO10P |
| PS(20:0_18:2) | GP | PS | 814.5598148 | 817.5832849 | [M-H]- | C44H84NO10P |
| PS(20:0_20:4) | GP | PS | 838.5598148 | 839.5676348 | [M-H]- | C46H82NO10P |
| PS(20:0_21:0) | GP | PS | 860.6380652 | 861.6458852 | [M-H]- | C47H92NO10P |
| PS(20:0_22:4) | GP | PS | 866.591115 | 867.598935 | [M-H]- | C48H86NO10P |
| PS(20:0_22:5) | GP | PS | 864.5754649 | 865.5832849 | [M-H]- | C48H84NO10P |
| PS(20:0_22:6) | GP | PS | 862.5598148 | 863.5676348 | [M-H]- | C48H82NO10P |
| PS(20:1_20:4) | GP | PS | 836.5441648 | 825.4580844 | [M-H]- | C46H68NO10P |
| PS(20:3_20:4) | GP | PS | 832.5128646 | 825.4580844 | [M-H]- | C46H68NO10P |
| PS(21:0_16:1) | GP | PS | 802.5598148 | 803.5676348 | [M-H]- | C43H82NO10P |
| PS(21:0_17:1) | GP | PS | 816.5754649 | 817.5832849 | [M-H]- | C44H84NO10P |
| PS(21:0_18:1) | GP | PS | 830.591115 | 831.598935 | [M-H]- | C45H86NO10P |
| PS(21:0_18:2) | GP | PS | 828.5754649 | 829.5832849 | [M-H]- | C45H84NO10P |
| PS(21:0_18:3) | GP | PS | 826.5598148 | 827.5676348 | [M-H]- | C45H82NO10P |
| PS(21:0_19:1) | GP | PS | 844.606765 | 829.5832849 | [M-H]- | C45H84NO10P |
| PS(21:0_20:1) | GP | PS | 858.6224151 | 859.6302351 | [M-H]- | C47H90NO10P |
| PS(21:0_20:2) | GP | PS | 856.606765 | 857.614585 | [M-H]- | C47H88NO10P |
| PS(21:0_20:3) | GP | PS | 854.591115 | 855.598935 | [M-H]- | C47H86NO10P |
| PS(21:0_20:5) | GP | PS | 850.5598148 | 851.5676348 | [M-H]- | C47H82NO10P |
| PS(21:0_22:6) | GP | PS | 876.5754649 | 889.6771853 | [M-H]- | C49H96NO10P |
| PS(21:0_24:1) | GP | PS | 914.6850154 | 885.5519848 | [M-H]- | C50H80NO10P |
| PS(21:2_20:4) | GP | PS | 848.5441648 | 849.5519848 | [M-H]- | C47H80NO10P |
| PS(22:2_20:4) | GP | PS | 862.5598148 | 863.5676348 | [M-H]- | C48H82NO10P |
| PS(23:0_18:1) | GP | PS | 858.6224151 | 859.6302351 | [M-H]- | C47H90NO10P |
| PS(23:0_18:2) | GP | PS | 856.606765 | 857.614585 | [M-H]- | C47H88NO10P |
| PS(23:0_20:4) | GP | PS | 880.606765 | 889.6771853 | [M-H]- | C49H96NO10P |
| PS(25:0_18:1) | GP | PS | 886.6537152 | 889.6771853 | [M-H]- | C49H96NO10P |
| SE(28:1_18:1) | ST | CASE | 682.650204 | 664.61583 | [M+NH4]+ | C46H80O2 |
| SE(28:1_18:2) | ST | CASE | 680.634554 | 662.60018 | [M+NH4]+ | C46H78O2 |
| SE(28:1_18:3) | ST | CASE | 678.618904 | 660.58453 | [M+NH4]+ | C46H76O2 |
| SE(28:1_20:3) | ST | CASE | 706.650204 | 688.61583 | [M+NH4]+ | C48H80O2 |
| SE(28:1_20:4) | ST | CASE | 704.634554 | 686.60018 | [M+NH4]+ | C48H78O2 |
| SE(28:1_22:6) | ST | CASE | 728.634554 | 710.60018 | [M+NH4]+ | C50H78O2 |
| SHexCer(d18:1/16:0(OH)) | SP | SHexCer | 796.8 | 795.516649 | [M+H]+ | C40H77NO12S |
| SHexCer(d18:1/16:0) | SP | SHexCer | 780.8 | 779.521734 | [M+H]+ | C40H77NO11S |
| SHexCer(d18:1/24:0(OH)) | SP | SHexCer | 908.8 | 907.641849 | [M+H]+ | C48H93NO12S |
| SHexCer(d18:1/24:0) | SP | SHexCer | 892.8 | 891.646934 | [M+H]+ | C48H93NO11S |
| SHexCer(d18:1/24:1) | SP | SHexCer | 890.8 | 889.631284 | [M+H]+ | C48H91NO11S |
| SM(d18:0/12:0) | SP | SM | 649.528451 | 648.520625 | [M+H]+ | C35H73N2O6P |
| SM(d18:0/13:0) | SP | SM | 663.544101 | 662.536275 | [M+H]+ | C36H75N2O6P |
| SM(d18:0/14:0) | SP | SM | 677.559751 | 676.551925 | [M+H]+ | C37H77N2O6P |
| SM(d18:0/16:0) | SP | SM | 705.591051 | 704.583225 | [M+H]+ | C39H81N2O6P |
| SM(d18:0/17:0) | SP | SM | 719.606701 | 718.598875 | [M+H]+ | C40H83N2O6P |
| SM(d18:0/18:0) | SP | SM | 733.622351 | 732.614525 | [M+H]+ | C41H85N2O6P |
| SM(d18:0/20:0) | SP | SM | 761.653651 | 760.645825 | [M+H]+ | C43H89N2O6P |
| SM(d18:0/22:0) | SP | SM | 789.684952 | 788.677125 | [M+H]+ | C45H93N2O6P |
| SM(d18:1/12:0) | SP | SM | 647.512801 | 646.504975 | [M+H]+ | C35H71N2O6P |
| SM(d18:1/14:0) | SP | SM | 675.544101 | 674.536275 | [M+H]+ | C37H75N2O6P |
| SM(d18:1/15:0) | SP | SM | 689.559751 | 688.551925 | [M+H]+ | C38H77N2O6P |
| SM(d18:1/16:0) | SP | SM | 703.575401 | 702.567575 | [M+H]+ | C39H79N2O6P |
| SM(d18:1/16:1) | SP | SM | 701.559751 | 700.551925 | [M+H]+ | C39H77N2O6P |
| SM(d18:1/17:0) | SP | SM | 717.591051 | 716.583225 | [M+H]+ | C40H81N2O6P |
| SM(d18:1/17:1) | SP | SM | 715.575401 | 714.567575 | [M+H]+ | C40H79N2O6P |
| SM(d18:1/18:0) | SP | SM | 731.606701 | 730.598875 | [M+H]+ | C41H83N2O6P |
| SM(d18:1/18:1) | SP | SM | 729.591051 | 728.583225 | [M+H]+ | C41H81N2O6P |
| SM(d18:1/19:0) | SP | SM | 745.622351 | 744.614525 | [M+H]+ | C42H85N2O6P |
| SM(d18:1/20:0) | SP | SM | 759.638001 | 758.630175 | [M+H]+ | C43H87N2O6P |
| SM(d18:1/20:1) | SP | SM | 757.622351 | 756.614525 | [M+H]+ | C43H85N2O6P |
| SM(d18:1/21:1) | SP | SM | 771.638001 | 770.630175 | [M+H]+ | C44H87N2O6P |
| SM(d18:1/22:1) | SP | SM | 785.653651 | 784.645825 | [M+H]+ | C45H89N2O6P |
| SM(d18:1/23:0) | SP | SM | 801.684951 | 800.677125 | [M+H]+ | C46H93N2O6P |
| SM(d18:1/24:0) | SP | SM | 815.700602 | 814.692775 | [M+H]+ | C47H95N2O6P |
| SM(d18:1/24:1) | SP | SM | 813.684952 | 812.677125 | [M+H]+ | C47H93N2O6P |
| SM(d18:1/25:0) | SP | SM | 829.716251 | 828.708425 | [M+H]+ | C48H97N2O6P |
| SM(d18:1/25:1) | SP | SM | 827.700601 | 826.692775 | [M+H]+ | C48H95N2O6P |
| SM(d18:1/26:0) | SP | SM | 843.7 | 842.724075 | [M+H]+ | C49H99N2O6P |
| SM(d18:1/26:1) | SP | SM | 841.716252 | 840.708425 | [M+H]+ | C49H97N2O6P |
| SM(d18:2/14:0) | SP | SM | 673.528451 | 672.520625 | [M+H]+ | C37H73N2O6P |
| SM(d18:2/18:1) | SP | SM | 727.575401 | 726.567575 | [M+H]+ | C41H79N2O6P |
| SM(d18:2/20:1) | SP | SM | 755.606701 | 754.598875 | [M+H]+ | C43H83N2O6P |
| SM(d18:2/22:1) | SP | SM | 783.638001 | 782.630175 | [M+H]+ | C45H87N2O6P |
| SM(d18:2/23:1) | SP | SM | 797.653651 | 796.645825 | [M+H]+ | C46H89N2O6P |
| SM(d18:2/24:1) | SP | SM | 811.669301 | 810.661475 | [M+H]+ | C47H91N2O6P |
| SM(d18:2/24:2) | SP | SM | 809.669301 | 808.645825 | [M+H]+ | C47H89N2O6P |
| SM(d18:2/24:3) | SP | SM | 807.638001 | 806.630175 | [M+H]+ | C47H87N2O6P |
| SM(d18:2/25:1) | SP | SM | 825.684951 | 824.677125 | [M+H]+ | C48H93N2O6P |
| SM(d20:0/24:1) | SP | SM | 843.731902 | 842.724075 | [M+H]+ | C49H99N2O6P |
| SPH(d16:1) | SP | SPH | 272.258954 | 271.251129 | [M+H]+ | C16H33NO2 |
| TG(10:0_16:0_12:0) | GL | TG | 684.61255 | 666.57984 | [M+NH4]+ | C41H78O6 |
| TG(10:0_16:0_16:1) | GL | TG | 738.66101 | 720.62679 | [M+NH4]+ | C45H84O6 |
| TG(10:0_16:0_18:1) | GL | TG | 766.692466 | 748.65809 | [M+NH4]+ | C47H88O6 |
| TG(10:0_16:0_18:2) | GL | TG | 764.672 | 746.64244 | [M+NH4]+ | C47H86O6 |
| TG(10:0_16:0_18:3) | GL | TG | 762.65912 | 744.62679 | [M+NH4]+ | C47H84O6 |
| TG(10:0_16:2_18:2) | GL | TG | 760.63928 | 742.61114 | [M+NH4]+ | C47H82O6 |
| TG(10:0_18:1_18:2) | GL | TG | 790.69043 | 772.65809 | [M+NH4]+ | C49H88O6 |
| TG(10:0_18:1_18:3) | GL | TG | 788.67285 | 770.64244 | [M+NH4]+ | C49H86O6 |
| TG(11:0_18:1_18:2) | GL | TG | 804.71 | 786.67374 | [M+NH4]+ | C50H90O6 |
| TG(12:0_14:0_16:0) | GL | TG | 740.676814 | 722.64244 | [M+NH4]+ | C45H86O6 |
| TG(12:0_14:0_16:1) | GL | TG | 738.65991 | 720.62679 | [M+NH4]+ | C45H84O6 |
| TG(12:0_14:0_18:1) | GL | TG | 766.692466 | 748.65809 | [M+NH4]+ | C47H88O6 |
| TG(12:0_14:0_18:2) | GL | TG | 764.67566 | 746.64244 | [M+NH4]+ | C47H86O6 |
| TG(12:0_15:0_16:0) | GL | TG | 754.68793 | 736.65809 | [M+NH4]+ | C46H88O6 |
| TG(12:0_15:0_18:1) | GL | TG | 780.70343 | 762.67374 | [M+NH4]+ | C48H90O6 |
| TG(12:0_16:0_16:0) | GL | TG | 768.70703 | 750.67374 | [M+NH4]+ | C47H90O6 |
| TG(12:0_16:0_16:1) | GL | TG | 766.692466 | 748.65809 | [M+NH4]+ | C47H88O6 |
| TG(12:0_16:0_18:1) | GL | TG | 794.723766 | 776.68939 | [M+NH4]+ | C49H92O6 |
| TG(12:0_16:0_18:2) | GL | TG | 792.70697 | 774.67374 | [M+NH4]+ | C49H90O6 |
| TG(12:0_16:0_18:3) | GL | TG | 790.69 | 772.65809 | [M+NH4]+ | C49H88O6 |
| TG(12:0_16:0_22:5) | GL | TG | 842.72583 | 824.68939 | [M+NH4]+ | C53H92O6 |
| TG(12:0_16:0_22:6) | GL | TG | 840.70734 | 822.67374 | [M+NH4]+ | C53H90O6 |
| TG(12:0_16:1_18:2) | GL | TG | 790.69464 | 772.65809 | [M+NH4]+ | C49H88O6 |
| TG(12:0_16:2_18:2) | GL | TG | 788.68 | 770.64244 | [M+NH4]+ | C49H86O6 |
| TG(12:0_18:1_18:3) | GL | TG | 816.708116 | 798.67374 | [M+NH4]+ | C51H90O6 |
| TG(12:0_18:1_22:6) | GL | TG | 866.72 | 848.68939 | [M+NH4]+ | C55H92O6 |
| TG(12:0_18:2_18:2) | GL | TG | 816.708116 | 798.67374 | [M+NH4]+ | C51H90O6 |
| TG(12:0_18:2_18:3) | GL | TG | 814.69049 | 796.65809 | [M+NH4]+ | C51H88O6 |
| TG(12:0_18:3_20:4) | GL | TG | 838.68878 | 820.65809 | [M+NH4]+ | C53H88O6 |
| TG(13:0_14:0_16:0) | GL | TG | 754.68793 | 736.65809 | [M+NH4]+ | C46H88O6 |
| TG(13:0_18:1_18:2) | GL | TG | 832.73 | 814.70504 | [M+NH4]+ | C52H94O6 |
| TG(13:0_18:1_22:6) | GL | TG | 880.74 | 862.70504 | [M+NH4]+ | C56H94O6 |
| TG(13:0_20:2_20:5) | GL | TG | 880.73 | 862.70504 | [M+NH4]+ | C56H94O6 |
| TG(14:0_14:0_16:0) | GL | TG | 768.708116 | 750.67374 | [M+NH4]+ | C47H90O6 |
| TG(14:0_14:0_16:1) | GL | TG | 766.69 | 748.65809 | [M+NH4]+ | C47H88O6 |
| TG(14:0_14:1_16:1) | GL | TG | 764.67267 | 746.64244 | [M+NH4]+ | C47H86O6 |
| TG(14:0_14:1_18:1) | GL | TG | 792.708116 | 774.67374 | [M+NH4]+ | C49H90O6 |
| TG(14:0_15:0_16:0) | GL | TG | 782.7171 | 764.68939 | [M+NH4]+ | C48H92O6 |
| TG(14:0_15:0_17:0) | GL | TG | 796.73 | 778.70504 | [M+NH4]+ | C49H94O6 |
| TG(14:0_15:0_18:1) | GL | TG | 808.73584 | 790.70504 | [M+NH4]+ | C50H94O6 |
| TG(14:0_15:0_18:2) | GL | TG | 806.72247 | 788.68939 | [M+NH4]+ | C50H92O6 |
| TG(14:0_16:0_16:0) | GL | TG | 796.739416 | 778.70504 | [M+NH4]+ | C49H94O6 |
| TG(14:0_16:0_16:1) | GL | TG | 794.723766 | 776.68939 | [M+NH4]+ | C49H92O6 |
| TG(14:0_16:0_18:0) | GL | TG | 824.770716 | 806.73634 | [M+NH4]+ | C51H98O6 |
| TG(14:0_16:0_18:1) | GL | TG | 822.755064 | 804.72069 | [M+NH4]+ | C51H96O6 |
| TG(14:0_16:0_18:2) | GL | TG | 820.739416 | 802.70504 | [M+NH4]+ | C51H94O6 |
| TG(14:0_16:0_20:4) | GL | TG | 844.74042 | 826.70504 | [M+NH4]+ | C53H94O6 |
| TG(14:0_16:0_22:0) | GL | TG | 880.833316 | 862.79894 | [M+NH4]+ | C55H106O6 |
| TG(14:0_16:0_22:5) | GL | TG | 870.755066 | 852.72069 | [M+NH4]+ | C55H96O6 |
| TG(14:0_16:1_17:1) | GL | TG | 806.72247 | 788.68939 | [M+NH4]+ | C50H92O6 |
| TG(14:0_16:1_18:1) | GL | TG | 820.739416 | 802.70504 | [M+NH4]+ | C51H94O6 |
| TG(14:0_16:1_18:2) | GL | TG | 818.723766 | 800.68939 | [M+NH4]+ | C51H92O6 |
| TG(14:0_16:1_18:3) | GL | TG | 816.708116 | 798.67374 | [M+NH4]+ | C51H90O6 |
| TG(14:0_16:1_20:4) | GL | TG | 842.723766 | 824.68939 | [M+NH4]+ | C53H92O6 |
| TG(14:0_16:1_20:5) | GL | TG | 840.70697 | 822.67374 | [M+NH4]+ | C53H90O6 |
| TG(14:0_17:1_18:2) | GL | TG | 832.73694 | 814.70504 | [M+NH4]+ | C52H94O6 |
| TG(14:0_17:2_18:2) | GL | TG | 830.73 | 812.68939 | [M+NH4]+ | C52H92O6 |
| TG(14:0_18:0_18:1) | GL | TG | 850.78 | 832.75199 | [M+NH4]+ | C53H100O6 |
| TG(14:0_18:0_18:2) | GL | TG | 848.770716 | 830.73634 | [M+NH4]+ | C53H98O6 |
| TG(14:0_18:0_20:0) | GL | TG | 880.833316 | 862.79894 | [M+NH4]+ | C55H106O6 |
| TG(14:0_18:0_20:2) | GL | TG | 876.802016 | 858.76764 | [M+NH4]+ | C55H102O6 |
| TG(14:0_18:1_20:2) | GL | TG | 874.786366 | 856.75199 | [M+NH4]+ | C55H100O6 |
| TG(14:0_18:2_18:2) | GL | TG | 844.74042 | 826.70504 | [M+NH4]+ | C53H94O6 |
| TG(14:0_18:2_18:3) | GL | TG | 842.723766 | 824.68939 | [M+NH4]+ | C53H92O6 |
| TG(14:0_18:2_18:4) | GL | TG | 840.71 | 822.67374 | [M+NH4]+ | C53H90O6 |
| TG(14:0_18:3_20:4) | GL | TG | 866.723766 | 848.68939 | [M+NH4]+ | C55H92O6 |
| TG(14:0_20:2_22:6) | GL | TG | 920.76 | 902.73634 | [M+NH4]+ | C59H98O6 |
| TG(14:0_20:4_22:6) | GL | TG | 916.73 | 898.70504 | [M+NH4]+ | C59H94O6 |
| TG(14:1_16:0_16:1) | GL | TG | 792.708116 | 774.67374 | [M+NH4]+ | C49H90O6 |
| TG(14:1_16:1_16:1) | GL | TG | 790.68787 | 772.65809 | [M+NH4]+ | C49H88O6 |
| TG(14:1_16:1_16:2) | GL | TG | 788.67291 | 770.64244 | [M+NH4]+ | C49H86O6 |
| TG(14:1_16:1_18:1) | GL | TG | 818.723766 | 800.68939 | [M+NH4]+ | C51H92O6 |
| TG(14:1_16:1_18:2) | GL | TG | 816.70752 | 798.67374 | [M+NH4]+ | C51H90O6 |
| TG(14:1_16:1_18:3) | GL | TG | 814.692466 | 796.65809 | [M+NH4]+ | C51H88O6 |
| TG(14:1_16:1_22:6) | GL | TG | 864.70544 | 846.67374 | [M+NH4]+ | C55H90O6 |
| TG(14:1_18:2_18:2) | GL | TG | 842.72583 | 824.68939 | [M+NH4]+ | C53H92O6 |
| TG(14:1_18:2_18:3) | GL | TG | 840.70367 | 822.67374 | [M+NH4]+ | C53H90O6 |
| TG(14:1_18:2_20:4) | GL | TG | 866.71 | 848.68939 | [M+NH4]+ | C55H92O6 |
| TG(15:0_16:0_16:0) | GL | TG | 810.75201 | 792.72069 | [M+NH4]+ | C50H96O6 |
| TG(15:0_16:0_16:1) | GL | TG | 808.73718 | 790.70504 | [M+NH4]+ | C50H94O6 |
| TG(15:0_16:0_18:0) | GL | TG | 838.78369 | 820.75199 | [M+NH4]+ | C52H100O6 |
| TG(15:0_16:0_18:1) | GL | TG | 836.77002 | 818.73634 | [M+NH4]+ | C52H98O6 |
| TG(15:0_16:0_18:2) | GL | TG | 834.75488 | 816.72069 | [M+NH4]+ | C52H96O6 |
| TG(15:0_16:0_24:1) | GL | TG | 920.85815 | 902.83024 | [M+NH4]+ | C58H110O6 |
| TG(15:0_16:1_16:1) | GL | TG | 806.723764 | 788.68939 | [M+NH4]+ | C50H92O6 |
| TG(15:0_16:1_18:1) | GL | TG | 834.75488 | 816.72069 | [M+NH4]+ | C52H96O6 |
| TG(15:0_16:1_18:2) | GL | TG | 832.73694 | 814.70504 | [M+NH4]+ | C52H94O6 |
| TG(15:0_16:1_18:3) | GL | TG | 830.72632 | 812.68939 | [M+NH4]+ | C52H92O6 |
| TG(15:0_16:1_20:4) | GL | TG | 856.73511 | 838.70504 | [M+NH4]+ | C54H94O6 |
| TG(15:0_16:1_22:6) | GL | TG | 880.73163 | 862.70504 | [M+NH4]+ | C56H94O6 |
| TG(15:0_17:0_18:0) | GL | TG | 852.79645 | 834.76764 | [M+NH4]+ | C53H102O6 |
| TG(15:0_17:0_19:2) | GL | TG | 862.78485 | 844.75199 | [M+NH4]+ | C54H100O6 |
| TG(15:0_18:0_18:1) | GL | TG | 864.77 | 846.76764 | [M+NH4]+ | C54H102O6 |
| TG(15:0_18:0_20:0) | GL | TG | 894.84344 | 876.81459 | [M+NH4]+ | C56H108O6 |
| TG(15:0_18:1_18:2) | GL | TG | 860.76984 | 842.73634 | [M+NH4]+ | C54H98O6 |
| TG(15:0_18:1_20:4) | GL | TG | 884.77124 | 866.73634 | [M+NH4]+ | C56H98O6 |
| TG(15:0_18:1_20:5) | GL | TG | 882.75 | 864.72069 | [M+NH4]+ | C56H96O6 |
| TG(15:0_18:1_22:1) | GL | TG | 918.84167 | 900.81459 | [M+NH4]+ | C58H108O6 |
| TG(15:0_18:1_22:6) | GL | TG | 908.77136 | 890.73634 | [M+NH4]+ | C58H98O6 |
| TG(15:0_18:1_24:1) | GL | TG | 946.87158 | 928.84589 | [M+NH4]+ | C60H112O6 |
| TG(15:0_18:2_18:2) | GL | TG | 858.755064 | 840.72069 | [M+NH4]+ | C54H96O6 |
| TG(15:0_18:2_18:3) | GL | TG | 856.7356 | 838.70504 | [M+NH4]+ | C54H94O6 |
| TG(15:0_18:2_22:5) | GL | TG | 908.75 | 890.73634 | [M+NH4]+ | C58H98O6 |
| TG(15:0_19:2_19:2) | GL | TG | 886.78705 | 868.75199 | [M+NH4]+ | C56H100O6 |
| TG(15:0_24:0_18:1) | GL | TG | 948.88812 | 930.86154 | [M+NH4]+ | C60H114O6 |
| TG(15:1_15:1_19:2) | GL | TG | 830.72 | 812.68939 | [M+NH4]+ | C52H92O6 |
| TG(15:1_17:1_17:1) | GL | TG | 832.74 | 814.70504 | [M+NH4]+ | C52H94O6 |
| TG(15:1_18:1_18:2) | GL | TG | 858.76 | 840.72069 | [M+NH4]+ | C54H96O6 |
| TG(15:1_18:1_18:3) | GL | TG | 856.74 | 838.70504 | [M+NH4]+ | C54H94O6 |
| TG(15:1_18:2_18:3) | GL | TG | 854.72162 | 836.68939 | [M+NH4]+ | C54H92O6 |
| TG(16:0_14:1_18:2) | GL | TG | 818.72034 | 800.68939 | [M+NH4]+ | C51H92O6 |
| TG(16:0_15:1_18:2) | GL | TG | 832.73 | 814.70504 | [M+NH4]+ | C52H94O6 |
| TG(16:0_16:0_16:0) | GL | TG | 824.770716 | 806.73634 | [M+NH4]+ | C51H98O6 |
| TG(16:0_16:0_16:1) | GL | TG | 822.755064 | 804.72069 | [M+NH4]+ | C51H96O6 |
| TG(16:0_16:0_17:0) | GL | TG | 838.786364 | 820.75199 | [M+NH4]+ | C52H100O6 |
| TG(16:0_16:0_18:0) | GL | TG | 852.802016 | 834.76764 | [M+NH4]+ | C53H102O6 |
| TG(16:0_16:0_18:1) | GL | TG | 850.786366 | 832.75199 | [M+NH4]+ | C53H100O6 |
| TG(16:0_16:0_20:2) | GL | TG | 876.8 | 858.76764 | [M+NH4]+ | C55H102O6 |
| TG(16:0_16:0_20:4) | GL | TG | 872.77386 | 854.73634 | [M+NH4]+ | C55H98O6 |
| TG(16:0_16:0_22:6) | GL | TG | 896.770716 | 878.73634 | [M+NH4]+ | C57H98O6 |
| TG(16:0_16:0_24:0) | GL | TG | 936.89459 | 918.86154 | [M+NH4]+ | C59H114O6 |
| TG(16:0_16:1_16:1) | GL | TG | 820.739416 | 802.70504 | [M+NH4]+ | C51H94O6 |
| TG(16:0_16:1_17:1) | GL | TG | 834.755064 | 816.72069 | [M+NH4]+ | C52H96O6 |
| TG(16:0_16:1_18:1) | GL | TG | 848.770716 | 830.73634 | [M+NH4]+ | C53H98O6 |
| TG(16:0_16:1_18:2) | GL | TG | 846.755066 | 828.72069 | [M+NH4]+ | C53H96O6 |
| TG(16:0_16:1_18:3) | GL | TG | 844.739416 | 826.70504 | [M+NH4]+ | C53H94O6 |
| TG(16:0_16:1_18:4) | GL | TG | 842.72 | 824.68939 | [M+NH4]+ | C53H92O6 |
| TG(16:0_16:1_20:0) | GL | TG | 878.817666 | 860.78329 | [M+NH4]+ | C55H104O6 |
| TG(16:0_16:1_20:1) | GL | TG | 876.802016 | 858.76764 | [M+NH4]+ | C55H102O6 |
| TG(16:0_16:1_20:4) | GL | TG | 870.755066 | 852.72069 | [M+NH4]+ | C55H96O6 |
| TG(16:0_16:1_20:5) | GL | TG | 868.739416 | 850.70504 | [M+NH4]+ | C55H94O6 |
| TG(16:0_16:1_22:1) | GL | TG | 904.833316 | 886.79894 | [M+NH4]+ | C57H106O6 |
| TG(16:0_16:1_22:5) | GL | TG | 896.770716 | 878.73634 | [M+NH4]+ | C57H98O6 |
| TG(16:0_16:1_22:6) | GL | TG | 894.755066 | 876.72069 | [M+NH4]+ | C57H96O6 |
| TG(16:0_16:2_16:3) | GL | TG | 814.692466 | 796.65809 | [M+NH4]+ | C51H88O6 |
| TG(16:0_16:2_18:3) | GL | TG | 842.73 | 824.68939 | [M+NH4]+ | C53H92O6 |
| TG(16:0_17:0_18:0) | GL | TG | 866.81531 | 848.78329 | [M+NH4]+ | C54H104O6 |
| TG(16:0_17:0_18:1) | GL | TG | 864.80133 | 846.76764 | [M+NH4]+ | C54H102O6 |
| TG(16:0_17:0_22:6) | GL | TG | 910.7757 | 892.75199 | [M+NH4]+ | C58H100O6 |
| TG(16:0_17:1_18:1) | GL | TG | 862.78485 | 844.75199 | [M+NH4]+ | C54H100O6 |
| TG(16:0_17:1_18:2) | GL | TG | 860.77283 | 842.73634 | [M+NH4]+ | C54H98O6 |
| TG(16:0_17:1_22:6) | GL | TG | 908.78 | 890.73634 | [M+NH4]+ | C58H98O6 |
| TG(16:0_17:2_20:4) | GL | TG | 882.75 | 864.72069 | [M+NH4]+ | C56H96O6 |
| TG(16:0_18:0_18:0) | GL | TG | 880.83099 | 862.79894 | [M+NH4]+ | C55H106O6 |
| TG(16:0_18:0_18:1) | GL | TG | 878.81744 | 860.78329 | [M+NH4]+ | C55H104O6 |
| TG(16:0_18:0_18:2) | GL | TG | 876.79034 | 858.76764 | [M+NH4]+ | C55H102O6 |
| TG(16:0_18:0_19:0) | GL | TG | 894.84753 | 876.81459 | [M+NH4]+ | C56H108O6 |
| TG(16:0_18:0_20:0) | GL | TG | 908.8609 | 890.83024 | [M+NH4]+ | C57H110O6 |
| TG(16:0_18:0_20:1) | GL | TG | 906.84711 | 888.81459 | [M+NH4]+ | C57H108O6 |
| TG(16:0_18:0_20:4) | GL | TG | 900.802016 | 882.76764 | [M+NH4]+ | C57H102O6 |
| TG(16:0_18:0_22:0) | GL | TG | 936.895916 | 918.86154 | [M+NH4]+ | C59H114O6 |
| TG(16:0_18:0_22:6) | GL | TG | 924.8017 | 906.76764 | [M+NH4]+ | C59H102O6 |
| TG(16:0_18:0_24:0) | GL | TG | 964.92761 | 946.89284 | [M+NH4]+ | C61H118O6 |
| TG(16:0_18:1_18:1) | GL | TG | 876.80182 | 858.76764 | [M+NH4]+ | C55H102O6 |
| TG(16:0_18:1_18:2) | GL | TG | 874.78589 | 856.75199 | [M+NH4]+ | C55H100O6 |
| TG(16:0_18:1_19:1) | GL | TG | 890.8161 | 872.78329 | [M+NH4]+ | C56H104O6 |
| TG(16:0_18:1_20:1) | GL | TG | 904.83606 | 886.79894 | [M+NH4]+ | C57H106O6 |
| TG(16:0_18:1_20:2) | GL | TG | 902.82343 | 884.78329 | [M+NH4]+ | C57H104O6 |
| TG(16:0_18:1_20:4) | GL | TG | 898.786366 | 880.75199 | [M+NH4]+ | C57H100O6 |
| TG(16:0_18:1_21:0) | GL | TG | 920.85529 | 902.83024 | [M+NH4]+ | C58H110O6 |
| TG(16:0_18:1_21:1) | GL | TG | 918.84564 | 900.81459 | [M+NH4]+ | C58H108O6 |
| TG(16:0_18:1_22:0) | GL | TG | 934.880266 | 916.84589 | [M+NH4]+ | C59H112O6 |
| TG(16:0_18:1_22:1) | GL | TG | 932.86023 | 914.83024 | [M+NH4]+ | C59H110O6 |
| TG(16:0_18:1_22:3) | GL | TG | 928.83008 | 910.79894 | [M+NH4]+ | C59H106O6 |
| TG(16:0_18:1_22:4) | GL | TG | 926.81519 | 908.78329 | [M+NH4]+ | C59H104O6 |
| TG(16:0_18:1_22:5) | GL | TG | 924.80176 | 906.76764 | [M+NH4]+ | C59H102O6 |
| TG(16:0_18:1_22:6) | GL | TG | 922.786366 | 904.75199 | [M+NH4]+ | C59H100O6 |
| TG(16:0_18:1_24:1) | GL | TG | 960.88605 | 942.86154 | [M+NH4]+ | C61H114O6 |
| TG(16:0_18:1_24:4) | GL | TG | 954.84448 | 936.81459 | [M+NH4]+ | C61H108O6 |
| TG(16:0_18:2_16:4) | GL | TG | 840.70734 | 822.67374 | [M+NH4]+ | C53H90O6 |
| TG(16:0_18:2_18:2) | GL | TG | 872.77008 | 854.73634 | [M+NH4]+ | C55H98O6 |
| TG(16:0_18:2_18:3) | GL | TG | 870.75208 | 852.72069 | [M+NH4]+ | C55H96O6 |
| TG(16:0_18:2_18:4) | GL | TG | 868.74237 | 850.70504 | [M+NH4]+ | C55H94O6 |
| TG(16:0_18:2_20:4) | GL | TG | 896.77222 | 878.73634 | [M+NH4]+ | C57H98O6 |
| TG(16:0_18:2_20:5) | GL | TG | 894.75232 | 876.72069 | [M+NH4]+ | C57H96O6 |
| TG(16:0_18:2_22:6) | GL | TG | 920.76624 | 902.73634 | [M+NH4]+ | C59H98O6 |
| TG(16:0_18:4_20:5) | GL | TG | 890.7179 | 872.68939 | [M+NH4]+ | C57H92O6 |
| TG(16:0_18:5_20:5) | GL | TG | 888.72 | 870.67374 | [M+NH4]+ | C57H90O6 |
| TG(16:0_19:1_20:2) | GL | TG | 916.83 | 898.79894 | [M+NH4]+ | C58H106O6 |
| TG(16:0_19:2_20:4) | GL | TG | 910.78 | 892.75199 | [M+NH4]+ | C58H100O6 |
| TG(16:0_20:0_18:1) | GL | TG | 906.84589 | 888.81459 | [M+NH4]+ | C57H108O6 |
| TG(16:0_20:0_22:6) | GL | TG | 952.83 | 934.79894 | [M+NH4]+ | C61H106O6 |
| TG(16:0_20:1_18:2) | GL | TG | 902.81 | 884.78329 | [M+NH4]+ | C57H104O6 |
| TG(16:0_20:1_21:1) | GL | TG | 946.88 | 928.84589 | [M+NH4]+ | C60H112O6 |
| TG(16:0_20:1_22:0) | GL | TG | 962.911566 | 944.87719 | [M+NH4]+ | C61H116O6 |
| TG(16:0_20:2_22:5) | GL | TG | 950.817666 | 932.78329 | [M+NH4]+ | C61H104O6 |
| TG(16:0_20:2_22:6) | GL | TG | 948.79 | 930.76764 | [M+NH4]+ | C61H102O6 |
| TG(16:0_20:3_24:5) | GL | TG | 976.82 | 958.79894 | [M+NH4]+ | C63H106O6 |
| TG(16:0_20:4_22:5) | GL | TG | 946.786366 | 928.75199 | [M+NH4]+ | C61H100O6 |
| TG(16:0_20:4_22:6) | GL | TG | 944.770713 | 926.73634 | [M+NH4]+ | C61H98O6 |
| TG(16:0_20:4_24:6) | GL | TG | 972.8 | 954.76764 | [M+NH4]+ | C63H102O6 |
| TG(16:0_22:1_18:2) | GL | TG | 930.85 | 912.81459 | [M+NH4]+ | C59H108O6 |
| TG(16:0_22:5_22:6) | GL | TG | 970.78467 | 952.75199 | [M+NH4]+ | C63H100O6 |
| TG(16:0_22:6_22:6) | GL | TG | 968.77057 | 950.73634 | [M+NH4]+ | C63H98O6 |
| TG(16:0_23:0_18:1) | GL | TG | 948.89142 | 930.86154 | [M+NH4]+ | C60H114O6 |
| TG(16:0_24:0_18:1) | GL | TG | 962.91071 | 944.87719 | [M+NH4]+ | C61H116O6 |
| TG(16:0_25:0_18:1) | GL | TG | 976.91925 | 958.89284 | [M+NH4]+ | C62H118O6 |
| TG(16:0_26:0_18:1) | GL | TG | 990.93573 | 972.90849 | [M+NH4]+ | C63H120O6 |
| TG(16:1_16:1_16:2) | GL | TG | 816.70532 | 798.67374 | [M+NH4]+ | C51H90O6 |
| TG(16:1_16:1_17:1) | GL | TG | 832.73663 | 814.70504 | [M+NH4]+ | C52H94O6 |
| TG(16:1_16:1_18:1) | GL | TG | 846.75299 | 828.72069 | [M+NH4]+ | C53H96O6 |
| TG(16:1_16:1_18:2) | GL | TG | 844.739416 | 826.70504 | [M+NH4]+ | C53H94O6 |
| TG(16:1_16:1_18:3) | GL | TG | 842.71686 | 824.68939 | [M+NH4]+ | C53H92O6 |
| TG(16:1_16:1_20:5) | GL | TG | 866.723766 | 848.68939 | [M+NH4]+ | C55H92O6 |
| TG(16:1_16:1_22:6) | GL | TG | 892.7251 | 874.70504 | [M+NH4]+ | C57H94O6 |
| TG(16:1_16:1_24:5) | GL | TG | 922.80664 | 904.75199 | [M+NH4]+ | C59H100O6 |
| TG(16:1_16:1_24:6) | GL | TG | 920.76624 | 902.73634 | [M+NH4]+ | C59H98O6 |
| TG(16:1_16:2_18:2) | GL | TG | 842.73 | 824.68939 | [M+NH4]+ | C53H92O6 |
| TG(16:1_16:2_22:6) | GL | TG | 890.724 | 872.68939 | [M+NH4]+ | C57H92O6 |
| TG(16:1_17:1_16:2) | GL | TG | 830.71985 | 812.68939 | [M+NH4]+ | C52H92O6 |
| TG(16:1_17:1_18:1) | GL | TG | 860.7666 | 842.73634 | [M+NH4]+ | C54H98O6 |
| TG(16:1_17:1_18:2) | GL | TG | 858.75183 | 840.72069 | [M+NH4]+ | C54H96O6 |
| TG(16:1_17:1_18:3) | GL | TG | 856.7395 | 838.70504 | [M+NH4]+ | C54H94O6 |
| TG(16:1_17:1_22:6) | GL | TG | 906.75 | 888.72069 | [M+NH4]+ | C58H96O6 |
| TG(16:1_18:0_20:1) | GL | TG | 904.81213 | 886.79894 | [M+NH4]+ | C57H106O6 |
| TG(16:1_18:1_16:3) | GL | TG | 842.72 | 824.68939 | [M+NH4]+ | C53H92O6 |
| TG(16:1_18:1_16:4) | GL | TG | 840.71 | 822.67374 | [M+NH4]+ | C53H90O6 |
| TG(16:1_18:1_18:1) | GL | TG | 874.78491 | 856.75199 | [M+NH4]+ | C55H100O6 |
| TG(16:1_18:1_18:2) | GL | TG | 872.77045 | 854.73634 | [M+NH4]+ | C55H98O6 |
| TG(16:1_18:1_18:3) | GL | TG | 870.74597 | 852.72069 | [M+NH4]+ | C55H96O6 |
| TG(16:1_18:1_20:3) | GL | TG | 898.786366 | 880.75199 | [M+NH4]+ | C57H100O6 |
| TG(16:1_18:1_20:5) | GL | TG | 894.76 | 876.72069 | [M+NH4]+ | C57H96O6 |
| TG(16:1_18:1_22:1) | GL | TG | 930.84247 | 912.81459 | [M+NH4]+ | C59H108O6 |
| TG(16:1_18:1_22:2) | GL | TG | 928.81775 | 910.79894 | [M+NH4]+ | C59H106O6 |
| TG(16:1_18:1_22:6) | GL | TG | 920.76624 | 902.73634 | [M+NH4]+ | C59H98O6 |
| TG(16:1_18:2_18:2) | GL | TG | 870.75372 | 852.72069 | [M+NH4]+ | C55H96O6 |
| TG(16:1_18:2_18:3) | GL | TG | 868.73779 | 850.70504 | [M+NH4]+ | C55H94O6 |
| TG(16:1_18:2_22:6) | GL | TG | 918.75494 | 900.72069 | [M+NH4]+ | C59H96O6 |
| TG(16:1_18:3_20:4) | GL | TG | 892.74 | 874.70504 | [M+NH4]+ | C57H94O6 |
| TG(16:1_20:4_20:5) | GL | TG | 916.739416 | 898.70504 | [M+NH4]+ | C59H94O6 |
| TG(16:2_18:2_18:3) | GL | TG | 866.72345 | 848.68939 | [M+NH4]+ | C55H92O6 |
| TG(17:0_17:0_19:1) | GL | TG | 892.82593 | 874.79894 | [M+NH4]+ | C56H106O6 |
| TG(17:0_18:0_18:0) | GL | TG | 894.84998 | 876.81459 | [M+NH4]+ | C56H108O6 |
| TG(17:0_18:0_18:1) | GL | TG | 892.83057 | 874.79894 | [M+NH4]+ | C56H106O6 |
| TG(17:0_18:1_18:1) | GL | TG | 890.786364 | 872.78329 | [M+NH4]+ | C56H104O6 |
| TG(17:0_18:1_18:2) | GL | TG | 888.8028 | 870.76764 | [M+NH4]+ | C56H102O6 |
| TG(17:0_18:1_20:1) | GL | TG | 918.85 | 900.81459 | [M+NH4]+ | C58H108O6 |
| TG(17:0_18:1_20:3) | GL | TG | 914.82 | 896.78329 | [M+NH4]+ | C58H104O6 |
| TG(17:0_18:1_20:4) | GL | TG | 912.79803 | 894.76764 | [M+NH4]+ | C58H102O6 |
| TG(17:0_18:1_22:5) | GL | TG | 938.81488 | 920.78329 | [M+NH4]+ | C60H104O6 |
| TG(17:0_18:1_22:6) | GL | TG | 936.80664 | 918.76764 | [M+NH4]+ | C60H102O6 |
| TG(17:0_18:2_18:3) | GL | TG | 884.77 | 866.73634 | [M+NH4]+ | C56H98O6 |
| TG(17:0_18:2_20:4) | GL | TG | 910.79 | 892.75199 | [M+NH4]+ | C58H100O6 |
| TG(17:0_18:2_20:5) | GL | TG | 908.77051 | 890.73634 | [M+NH4]+ | C58H98O6 |
| TG(17:0_18:2_22:5) | GL | TG | 936.79 | 918.76764 | [M+NH4]+ | C60H102O6 |
| TG(17:0_18:2_22:6) | GL | TG | 934.78571 | 916.75199 | [M+NH4]+ | C60H100O6 |
| TG(17:0_18:3_18:3) | GL | TG | 882.76 | 864.72069 | [M+NH4]+ | C56H96O6 |
| TG(17:0_19:2_19:2) | GL | TG | 914.81628 | 896.78329 | [M+NH4]+ | C58H104O6 |
| TG(17:1_17:1_24:6) | GL | TG | 948.8009 | 930.76764 | [M+NH4]+ | C61H102O6 |
| TG(17:1_18:1_18:1) | GL | TG | 888.802014 | 870.76764 | [M+NH4]+ | C56H102O6 |
| TG(17:1_18:1_18:2) | GL | TG | 886.7851 | 868.75199 | [M+NH4]+ | C56H100O6 |
| TG(17:1_18:1_20:1) | GL | TG | 916.82721 | 898.79894 | [M+NH4]+ | C58H106O6 |
| TG(17:1_18:1_20:2) | GL | TG | 914.81274 | 896.78329 | [M+NH4]+ | C58H104O6 |
| TG(17:1_18:1_20:4) | GL | TG | 910.78217 | 892.75199 | [M+NH4]+ | C58H100O6 |
| TG(17:1_18:1_24:2) | GL | TG | 970.87531 | 952.84589 | [M+NH4]+ | C62H112O6 |
| TG(17:1_18:2_18:2) | GL | TG | 884.770714 | 866.73634 | [M+NH4]+ | C56H98O6 |
| TG(17:1_18:2_18:3) | GL | TG | 882.74475 | 864.72069 | [M+NH4]+ | C56H96O6 |
| TG(17:1_18:2_22:6) | GL | TG | 932.77 | 914.73634 | [M+NH4]+ | C60H98O6 |
| TG(17:1_19:2_19:2) | GL | TG | 912.8 | 894.76764 | [M+NH4]+ | C58H102O6 |
| TG(18:0_16:1_20:1) | GL | TG | 904.81 | 886.79894 | [M+NH4]+ | C57H106O6 |
| TG(18:0_16:1_24:6) | GL | TG | 950.82 | 932.78329 | [M+NH4]+ | C61H104O6 |
| TG(18:0_16:2_20:2) | GL | TG | 900.8 | 882.76764 | [M+NH4]+ | C57H102O6 |
| TG(18:0_17:1_18:1) | GL | TG | 890.83 | 872.78329 | [M+NH4]+ | C56H104O6 |
| TG(18:0_18:0_18:0) | GL | TG | 908.864616 | 890.83024 | [M+NH4]+ | C57H110O6 |
| TG(18:0_18:0_18:1) | GL | TG | 906.848966 | 888.81459 | [M+NH4]+ | C57H108O6 |
| TG(18:0_18:0_22:6) | GL | TG | 952.83392 | 934.79894 | [M+NH4]+ | C61H106O6 |
| TG(18:0_18:1_18:1) | GL | TG | 904.833316 | 886.79894 | [M+NH4]+ | C57H106O6 |
| TG(18:0_18:1_18:2) | GL | TG | 902.817666 | 884.78329 | [M+NH4]+ | C57H104O6 |
| TG(18:0_18:1_19:1) | GL | TG | 918.84564 | 900.81459 | [M+NH4]+ | C58H108O6 |
| TG(18:0_18:1_20:0) | GL | TG | 934.87579 | 916.84589 | [M+NH4]+ | C59H112O6 |
| TG(18:0_18:1_20:1) | GL | TG | 932.8656 | 914.83024 | [M+NH4]+ | C59H110O6 |
| TG(18:0_18:1_20:3) | GL | TG | 928.83112 | 910.79894 | [M+NH4]+ | C59H106O6 |
| TG(18:0_18:1_20:4) | GL | TG | 926.81738 | 908.78329 | [M+NH4]+ | C59H104O6 |
| TG(18:0_18:1_22:3) | GL | TG | 956.85828 | 938.83024 | [M+NH4]+ | C61H110O6 |
| TG(18:0_18:1_22:4) | GL | TG | 954.8457 | 936.81459 | [M+NH4]+ | C61H108O6 |
| TG(18:0_18:1_22:5) | GL | TG | 952.83209 | 934.79894 | [M+NH4]+ | C61H106O6 |
| TG(18:0_18:1_22:6) | GL | TG | 950.817666 | 932.78329 | [M+NH4]+ | C61H104O6 |
| TG(18:0_18:2_20:0) | GL | TG | 932.864616 | 914.83024 | [M+NH4]+ | C59H110O6 |
| TG(18:0_18:2_20:2) | GL | TG | 928.83 | 910.79894 | [M+NH4]+ | C59H106O6 |
| TG(18:0_18:2_20:3) | GL | TG | 926.82 | 908.78329 | [M+NH4]+ | C59H104O6 |
| TG(18:0_18:2_20:4) | GL | TG | 924.80151 | 906.76764 | [M+NH4]+ | C59H102O6 |
| TG(18:0_18:2_22:4) | GL | TG | 952.85 | 934.79894 | [M+NH4]+ | C61H106O6 |
| TG(18:0_18:2_22:6) | GL | TG | 948.8009 | 930.76764 | [M+NH4]+ | C61H102O6 |
| TG(18:0_18:3_20:2) | GL | TG | 926.817666 | 908.78329 | [M+NH4]+ | C59H104O6 |
| TG(18:0_20:0_22:0) | GL | TG | 992.958516 | 974.92414 | [M+NH4]+ | C63H122O6 |
| TG(18:0_20:1_20:4) | GL | TG | 954.85 | 936.81459 | [M+NH4]+ | C61H108O6 |
| TG(18:0_20:1_22:0) | GL | TG | 990.942864 | 972.90849 | [M+NH4]+ | C63H120O6 |
| TG(18:0_20:1_22:1) | GL | TG | 988.927 | 970.89284 | [M+NH4]+ | C63H118O6 |
| TG(18:0_20:2_18:3) | GL | TG | 926.82 | 908.78329 | [M+NH4]+ | C59H104O6 |
| TG(18:0_20:3_22:5) | GL | TG | 976.83 | 958.79894 | [M+NH4]+ | C63H106O6 |
| TG(18:0_20:4_22:5) | GL | TG | 974.8175 | 956.78329 | [M+NH4]+ | C63H104O6 |
| TG(18:0_20:4_22:6) | GL | TG | 972.802016 | 954.76764 | [M+NH4]+ | C63H102O6 |
| TG(18:0_22:0_18:2) | GL | TG | 960.89301 | 942.86154 | [M+NH4]+ | C61H114O6 |
| TG(18:1_16:2_20:5) | GL | TG | 892.74 | 874.70504 | [M+NH4]+ | C57H94O6 |
| TG(18:1_17:2_18:2) | GL | TG | 884.78 | 866.73634 | [M+NH4]+ | C56H98O6 |
| TG(18:1_17:2_19:2) | GL | TG | 898.78 | 880.75199 | [M+NH4]+ | C57H100O6 |
| TG(18:1_18:1_18:1) | GL | TG | 902.81805 | 884.78329 | [M+NH4]+ | C57H104O6 |
| TG(18:1_18:1_18:2) | GL | TG | 900.802016 | 882.76764 | [M+NH4]+ | C57H102O6 |
| TG(18:1_18:1_19:1) | GL | TG | 916.8194 | 898.79894 | [M+NH4]+ | C58H106O6 |
| TG(18:1_18:1_20:1) | GL | TG | 930.8479 | 912.81459 | [M+NH4]+ | C59H108O6 |
| TG(18:1_18:1_22:1) | GL | TG | 958.87683 | 940.84589 | [M+NH4]+ | C61H112O6 |
| TG(18:1_18:1_22:2) | GL | TG | 956.86188 | 938.83024 | [M+NH4]+ | C61H110O6 |
| TG(18:1_18:1_22:4) | GL | TG | 952.83209 | 934.79894 | [M+NH4]+ | C61H106O6 |
| TG(18:1_18:1_22:5) | GL | TG | 950.817666 | 932.78329 | [M+NH4]+ | C61H104O6 |
| TG(18:1_18:1_22:6) | GL | TG | 948.79718 | 930.76764 | [M+NH4]+ | C61H102O6 |
| TG(18:1_18:1_24:1) | GL | TG | 986.9054 | 968.87719 | [M+NH4]+ | C63H116O6 |
| TG(18:1_18:1_24:4) | GL | TG | 980.86798 | 962.83024 | [M+NH4]+ | C63H110O6 |
| TG(18:1_18:2_18:2) | GL | TG | 898.786366 | 880.75199 | [M+NH4]+ | C57H100O6 |
| TG(18:1_18:2_18:3) | GL | TG | 896.770716 | 878.73634 | [M+NH4]+ | C57H98O6 |
| TG(18:1_18:2_18:4) | GL | TG | 894.75232 | 876.72069 | [M+NH4]+ | C57H96O6 |
| TG(18:1_18:2_19:2) | GL | TG | 912.81 | 894.76764 | [M+NH4]+ | C58H102O6 |
| TG(18:1_18:2_20:0) | GL | TG | 930.848966 | 912.81459 | [M+NH4]+ | C59H108O6 |
| TG(18:1_18:2_20:1) | GL | TG | 928.81982 | 910.79894 | [M+NH4]+ | C59H106O6 |
| TG(18:1_18:2_20:2) | GL | TG | 926.81464 | 908.78329 | [M+NH4]+ | C59H104O6 |
| TG(18:1_18:2_20:4) | GL | TG | 922.78271 | 904.75199 | [M+NH4]+ | C59H100O6 |
| TG(18:1_18:2_22:0) | GL | TG | 958.8761 | 940.84589 | [M+NH4]+ | C61H112O6 |
| TG(18:1_18:2_22:2) | GL | TG | 954.84351 | 936.81459 | [M+NH4]+ | C61H108O6 |
| TG(18:1_18:2_22:3) | GL | TG | 952.82 | 934.79894 | [M+NH4]+ | C61H106O6 |
| TG(18:1_18:2_22:4) | GL | TG | 950.817666 | 932.78329 | [M+NH4]+ | C61H104O6 |
| TG(18:1_18:2_22:5) | GL | TG | 948.7981 | 930.76764 | [M+NH4]+ | C61H102O6 |
| TG(18:1_18:2_22:6) | GL | TG | 946.78754 | 928.75199 | [M+NH4]+ | C61H100O6 |
| TG(18:1_18:2_24:5) | GL | TG | 976.85 | 958.79894 | [M+NH4]+ | C63H106O6 |
| TG(18:1_18:3_20:5) | GL | TG | 918.74 | 900.72069 | [M+NH4]+ | C59H96O6 |
| TG(18:1_18:3_22:3) | GL | TG | 950.82 | 932.78329 | [M+NH4]+ | C61H104O6 |
| TG(18:1_19:1_18:3) | GL | TG | 912.79 | 894.76764 | [M+NH4]+ | C58H102O6 |
| TG(18:1_20:1_20:1) | GL | TG | 958.880266 | 940.84589 | [M+NH4]+ | C61H112O6 |
| TG(18:1_20:1_20:2) | GL | TG | 956.87 | 938.83024 | [M+NH4]+ | C61H110O6 |
| TG(18:1_20:1_22:1) | GL | TG | 986.91168 | 968.87719 | [M+NH4]+ | C63H116O6 |
| TG(18:1_20:1_22:6) | GL | TG | 976.83276 | 958.79894 | [M+NH4]+ | C63H106O6 |
| TG(18:1_20:2_18:3) | GL | TG | 924.8 | 906.76764 | [M+NH4]+ | C59H102O6 |
| TG(18:1_20:2_20:4) | GL | TG | 950.81 | 932.78329 | [M+NH4]+ | C61H104O6 |
| TG(18:1_20:2_22:4) | GL | TG | 978.84 | 960.81459 | [M+NH4]+ | C63H108O6 |
| TG(18:1_20:3_22:4) | GL | TG | 976.82965 | 958.79894 | [M+NH4]+ | C63H106O6 |
| TG(18:1_20:3_22:6) | GL | TG | 972.80157 | 954.76764 | [M+NH4]+ | C63H102O6 |
| TG(18:1_20:4_22:5) | GL | TG | 972.8 | 954.76764 | [M+NH4]+ | C63H102O6 |
| TG(18:1_20:4_22:6) | GL | TG | 970.7818 | 952.75199 | [M+NH4]+ | C63H100O6 |
| TG(18:1_20:5_22:5) | GL | TG | 970.78 | 952.75199 | [M+NH4]+ | C63H100O6 |
| TG(18:1_22:1_18:2) | GL | TG | 956.86292 | 938.83024 | [M+NH4]+ | C61H110O6 |
| TG(18:1_22:5_22:6) | GL | TG | 996.80176 | 978.76764 | [M+NH4]+ | C65H102O6 |
| TG(18:1_24:1_18:2) | GL | TG | 984.89502 | 966.86154 | [M+NH4]+ | C63H114O6 |
| TG(18:2_18:2_18:3) | GL | TG | 894.755066 | 876.72069 | [M+NH4]+ | C57H96O6 |
| TG(18:2_18:2_20:1) | GL | TG | 926.81641 | 908.78329 | [M+NH4]+ | C59H104O6 |
| TG(18:2_18:2_20:2) | GL | TG | 924.80151 | 906.76764 | [M+NH4]+ | C59H102O6 |
| TG(18:2_18:2_22:1) | GL | TG | 954.84814 | 936.81459 | [M+NH4]+ | C61H108O6 |
| TG(18:2_18:2_22:4) | GL | TG | 948.8009 | 930.76764 | [M+NH4]+ | C61H102O6 |
| TG(18:2_18:2_22:6) | GL | TG | 944.77032 | 926.73634 | [M+NH4]+ | C61H98O6 |
| TG(18:2_18:2_24:5) | GL | TG | 974.82 | 956.78329 | [M+NH4]+ | C63H104O6 |
| TG(18:2_18:3_18:3) | GL | TG | 892.739416 | 874.70504 | [M+NH4]+ | C57H94O6 |
| TG(18:2_18:3_18:4) | GL | TG | 890.72583 | 872.68939 | [M+NH4]+ | C57H92O6 |
| TG(18:2_18:3_20:4) | GL | TG | 918.755066 | 900.72069 | [M+NH4]+ | C59H96O6 |
| TG(18:2_18:3_20:5) | GL | TG | 916.739416 | 898.70504 | [M+NH4]+ | C59H94O6 |
| TG(18:2_18:3_22:6) | GL | TG | 942.75507 | 924.72069 | [M+NH4]+ | C61H96O6 |
| TG(18:2_20:2_22:6) | GL | TG | 972.81 | 954.76764 | [M+NH4]+ | C63H102O6 |
| TG(18:2_20:3_20:4) | GL | TG | 946.78577 | 928.75199 | [M+NH4]+ | C61H100O6 |
| TG(18:2_20:3_22:5) | GL | TG | 972.8 | 954.76764 | [M+NH4]+ | C63H102O6 |
| TG(18:2_20:4_20:4) | GL | TG | 944.77148 | 926.73634 | [M+NH4]+ | C61H98O6 |
| TG(18:2_20:4_20:5) | GL | TG | 942.755064 | 924.72069 | [M+NH4]+ | C61H96O6 |
| TG(18:2_20:5_20:5) | GL | TG | 940.73914 | 922.70504 | [M+NH4]+ | C61H94O6 |
| TG(18:2_20:5_22:6) | GL | TG | 966.75488 | 948.72069 | [M+NH4]+ | C63H96O6 |
| TG(18:2_22:5_22:6) | GL | TG | 994.78632 | 976.75199 | [M+NH4]+ | C65H100O6 |
| TG(18:3_20:4_20:4) | GL | TG | 942.76 | 924.72069 | [M+NH4]+ | C61H96O6 |
| TG(19:0_18:2_18:2) | GL | TG | 914.8 | 896.78329 | [M+NH4]+ | C58H104O6 |
| TG(19:1_18:2_18:2) | GL | TG | 912.79803 | 894.76764 | [M+NH4]+ | C58H102O6 |
| TG(20:0_18:1_22:6) | GL | TG | 978.84 | 960.81459 | [M+NH4]+ | C63H108O6 |
| TG(20:0_18:2_18:2) | GL | TG | 928.84 | 910.79894 | [M+NH4]+ | C59H106O6 |
| TG(20:0_18:3_18:3) | GL | TG | 924.8 | 906.76764 | [M+NH4]+ | C59H102O6 |
| TG(20:1_18:2_18:0) | GL | TG | 930.84247 | 912.81459 | [M+NH4]+ | C59H108O6 |
| TG(20:1_18:2_18:3) | GL | TG | 924.8 | 906.76764 | [M+NH4]+ | C59H102O6 |
| TG(20:1_18:2_22:6) | GL | TG | 974.8175 | 956.78329 | [M+NH4]+ | C63H104O6 |
| TG(20:1_18:3_18:3) | GL | TG | 922.79 | 904.75199 | [M+NH4]+ | C59H100O6 |
| TG(21:0_18:1_18:2) | GL | TG | 944.86401 | 926.83024 | [M+NH4]+ | C60H110O6 |
| TG(22:0_18:1_18:1) | GL | TG | 960.89227 | 942.86154 | [M+NH4]+ | C61H114O6 |
| TG(23:0_18:1_18:1) | GL | TG | 974.90228 | 956.87719 | [M+NH4]+ | C62H116O6 |
| TG(23:0_18:1_18:2) | GL | TG | 972.89142 | 954.86154 | [M+NH4]+ | C62H114O6 |
| TG(24:0_18:1_18:1) | GL | TG | 988.92389 | 970.89284 | [M+NH4]+ | C63H118O6 |
| TG(24:0_18:1_18:2) | GL | TG | 986.91034 | 968.87719 | [M+NH4]+ | C63H116O6 |
| TG(24:0_18:1_20:1) | GL | TG | 1016.94824 | 998.92414 | [M+NH4]+ | C65H122O6 |
| TG(24:1_18:2_18:2) | GL | TG | 982.87994 | 964.84589 | [M+NH4]+ | C63H112O6 |
| TG(8:0_10:0_10:0) | GL | TG | 544.46 | 526.42334 | [M+NH4]+ | C31H58O6 |
| TG(8:0_16:0_16:0) | GL | TG | 712.64215 | 694.61114 | [M+NH4]+ | C43H82O6 |
| TG(8:0_16:0_18:1) | GL | TG | 738.65857 | 720.62679 | [M+NH4]+ | C45H84O6 |
| TG(8:0_16:0_18:2) | GL | TG | 736.64233 | 718.61114 | [M+NH4]+ | C45H82O6 |
| TG(8:0_16:0_18:3) | GL | TG | 734.62885 | 716.59549 | [M+NH4]+ | C45H80O6 |
| TG(8:0_18:1_18:2) | GL | TG | 762.65674 | 744.62679 | [M+NH4]+ | C47H84O6 |
| TG(O-20:0_16:0_22:5) | GL | TG-O | 940.869699 | 922.835325 | [M+NH4]+ | C61H110O5 |
| TXB2 | FA | Eicosanoid | 369.227675 | 370.2355388 | [M-H]- | C20H34O6 |
| Taurochenodeoxycholic acid | ST | BA | 498.5 | 499.296753 | [M-H]- | C26H45NO6S |
| Taurocholic acid | ST | BA | 514.7 | 515.291687 | [M-H]- | C26H45NO7S |
| TxB3 | FA | Eicosanoid | 367.212075 | 368.2198888 | [M-H]- | C20H32O6 |
| Ursocholic acid | ST | BA | 407.4 | 408.287567 | [M-H]- | C24H40O5 |
| Ursodeoxycholic acid | ST | BA | 391.5 | 392.292664 | [M-H]- | C24H40O4 |
| lithocholic acid-3-sulfate | ST | BA | 455.6 | 456.254547 | [M-H]- | C24H38O3 |
| taurolithocholic acid-3-sulfate | ST | BA | 281.1 | 563.258667 | [M-H]- | C26H45NO8S2 |

# Study protocol

**1. Background** The World Health Organization (WHO) defines obesity as excessive fat accumulation that can damage health, which is a chronic metabolic disease [1]. If fat is mainly accumulated in the abdominal wall and abdominal cavity, it is called abdominal obesity or central obesity, which is more likely to cause metabolic diseases [2]. Abdominal obesity can lead to hypertension, dyslipidemia, and insulin resistance, which is associated with complications such as cerebral infarction, cardiovascular disease, and type 2 diabetes, which represent the leading causes of adult morbidity and mortality worldwide [3]. Research shows that every 11 cm increase in waist circumference will increase the risk of obesity related cancer by 13% [4]. The *Lancet* reported in 2016: from 1975 to 2014, the number of obese people in the world increased from 105 million to 641 million, and the number of obese people in the world surpassed that of thin people [5]. A report on obesity health burden released by the Organization for Economic Cooperation and Development indicates that 70% of the treatment cost of diabetes, 23% of the treatment cost of cardiovascular disease, and 9% of the treatment cost of cancer are all caused by obesity [6].

Although lifestyle intervention (diet and exercise) represents the cornerstone of weight management [7-8], sustaining waistline and weight loss alone over the long term is challenging [9]. Furthermore, studies on lifestyle intervention have shown that it is difficult to maintain weight stability when obesity is associated with various metabolic changes [10]. The use of pharmacotherapy remains limited by modest efficacy and safety concerns [11], like oily discharge followed by flatus and faecal incontinence for orlistat [12]; headache, nausea and dizziness for lorcaserin [13] or body weight regaining upon cessation of therapy [14]. Bariatric surgery is associated with a variety of complications [15-16]. Thus, complementary/alternative therapies, such as electroacupuncture (EA), has now been increasingly used in abdominal obesity clinical practice [17-18], although evidence of its efficacy is limited.

Acupuncture, which is approved by the WHO and the National Institutes of Health (NIH) [19], has been widely used to treat various diseases as one of the most popular complementary and alternative approaches [20-21]. Acupuncturist inserts stainless steel needles into specific acupoints, which is composed based on TCM theory, to achieve the sensation of Deqi and produce therapeutic effects. The efficacy of acupuncture can be further enhanced by the technique involved the conduction of electrical stimulation by acupuncture needles at certain frequencies, which is called EA. Recent evidence suggests that EA may be an effective treatment option as an adjunct for weight loss [22]. It is reported that EA has positive effects on the central nervous system [23], metabolism [24], endocrine system [25], and gastrointestinal system [26] in the treatment of obesity. However, the effects of EA on obesity remain uncertain because of the poor study design and high risks of bias in the previous clinical trials, and deeper research on the mechanism of curative effect of EA for obese is still lacking.

Metabolomic studies have consistently indicated it can reflect the physiological state of an organism more directly and accurately [27]. As complex metabolic changes are associated with obesity, metabolomic technology has been applied to find the underlying metabolic disorder mechanisms [28]. In recent years, metabolomics has been widely used in research on clinical therapeutic mechanism of acupuncture [29]. Recently published RCT has indicated that 6 weeks of acupuncture treatment increased the certain carnitine (C2, C4, C6, and l-carnitine) levels, which could result in potential long-term benefits to obese individuals [30]. Nowadays, evidence has accumulated that the gut microbiota is an important environmental factor contributing to obesity development [31]. It suggested that obese individuals showed pronounced metabolic alterations compared with thin controls, and amino acid metabolism by gut microbial species may modulate the levels of circulating amino acids that are correlated with obesity and its metabolic complication [32]. In a previous study, some researchers applied EA to abdominal obese rats induced by the high-fat diet and found acupuncture decreased the body weight, waistline, and visceral adipose tissues and effectively modified the composition of gut microbiota of rats [33-34]. EA may produce treatment effect and provide additional valuable information on mechanisms for abdominal obesity, especially by linking information on the gut microbiome with blood metabolite data [35-36].

Nevertheless, there is no acupuncture research linking information on the gut microbiome with blood metabolite data. Hence, findings supported related conclusions that need further investigation in clinical observation. Randomized clinical trials in high quality are needed to evaluate the clinical effects and long-term effectiveness of acupuncture in the treatment of abdominal obesity.

**2. Study aims**

Considering these features, we designed this, randomized, sham-controlled clinical trial to investigate the effect of EA on abdominal obesity. We will also use LS/MS-based metabolomics to characterize the difference in the metabolic profiles of the plasma of abdominal obesity patients after EA. Furthermore, the sequencing of intestinal microbial communities by the 16S rRNA gene sequencing technique will be used to investigate the mechanism of EA for treating abdominal obesity and will be paired with thin as a control.

**3. Design and Methods**

**3.1 Design**

This will be randomized, sham-controlled trial on EA intervention for abdominal obesity at Hubei Provincial Hospital of Traditional Chinese Medical. 68 participants and 34 healthy adults will be enrolled from the public through advertisements. Participants will be randomly assigned in a 1:1 ratio to receive EA once a day for 8 weeks or matching placebo; this 8-week period was followed by a 24-week period without EA or SA. The flow chart of the trial is shown in Fig. 1. The trial will be conducted in accordance with the principles of the Declaration of Helsinki and Good Clinical Practice guidelines. This study protocol is compliant with the principles of the Consolidated Standards of Reporting Trials (CONSORT) guidelines and the Standards for Reporting Interventions in Clinical Trials of Acupuncture (STRICTA) [37-38] (Guidelines Checklist). The protocol was approved by Hubei Provincial Hospital of Traditional Chinese Medical Ethics Committee (HBZY2021-C12-01) and registered in ClinicalTrials.gov (NCT04957134). Informed consent will be obtained from each participant.

Recruitment

Screening visit

Baseline assessment

Inclusion criteria

Exclusion criteria

Patients with abdominal obesity (n=68)

Healthy controls (n=34)

Randomized

SA group (n=34):

SA intervention of 8 weeks

EA group (n=34):

EA intervention of 8 weeks

Outcome assessment

Metabolic biomarkers

and gut microbiome assessment

Follow-up of 24 weeks (n= )

Fig. 1 Trial flow chart

**3.3 Patients**

***Inclusion criteria***

Patients who meet all of the following criteria will be eligible for the study:

1. men or women aged 18 to 55 years;

2. diagnosis of abdominal obesity, defined as waist circumference ≥ 85cm in men or ≥ 80cm in women [39];

3. voluntarily signed informed consent accepting EA intervention.

Healthy controls who meet all of the following criteria will be eligible for the study:

1. No organic or functional diseases in the past;

2. No cold or other abnormalities in the near future;

3. Males and females aged between 18 and 55 years old;

4. Males' waist circumference ＜ 85cm or females' waist circumference ＜ 80cm;

5. Patients without mental illness; who has not participated in other clinical studies recently; who sign the informed consent and voluntarily accept the project.

***Exclusion criteria***

Patients who meet any of the following criteria will be excluded from the study:

1. Endocrine diseases which can cause obesity, such as polycystic ovary syndrome, Cushing syndrome, or hypothyroidism.

2. Using medications known to interfere with glycometabolism or lipid metabolism.

3. Type 2 diabetes mellitus or poorly managed hypertension (SBP≥160 mmHg and/or DBP≥100 mmHg) [40].

4. Severe internal diseases such as serious lung, heart, liver, or kidney disease; nervous system diseases or mental disorders.

5. Women who were pregnant, lactating, or planning to become pregnant within the next 32 weeks.

6. Clinical diagnosis of an eating disorder such as bulimia nervosa or anorexia nervosa.

7. Weight changes greater than 5 kg in the previous 3 months or use of drugs known to influence weight or appetite within the same period (e.g., diet pills, corticosteroids, antidepressants, diazepam, non-selective antihistamines, nicotine replacements, or hypoglycemic drugs).

8. Plans to quit smoking or drinking.

9. Participation in other clinical research on obesity within the previous 3 months.

10. Received acupuncture within 6 months before enrollment

**Intervention**

Participants in EA groups and SA groups were required to record their food intake and exercise levels one week before enrollment in a diet and exercise diary. All participants were instructed keep healthy lifestyle habits such as regular exercise and healthy diet. Based on body weight, participants were instructed to follow a calorie-restricted diet: those weighing less than 250 pounds were advised to consume 1200-1499 kcal/day, while those over 250 pounds were recommended 1500-1800 kcal/day. The diet consisted of traditional foods, with approximately 15-20% of total calories from protein, 20-35% from fat, and the remainder from carbohydrates. Participants were also instructed to track their daily food and calorie intake. Regarding physical activity, they were encouraged to engage in at least 180 minutes per week of low-to-moderate intensity exercise (such as walking), preferably reaching 225 minutes or more across at least five days each week. To objectively assess adherence, all participants were provided with diet and physical activity diaries and asked to record their dietary intake and physical activity each week. Participants whose mean daily caloric intake and cumulative weekly physical activity duration met the recommended standards were classified as having good dietary and exercise adherence, respectively.

EA and SA interventions were administered by 2 acupuncturists with at least 5 years of experience. All research assistants and acupuncturists received a training session before study initiation, which was launched by the PI. Both patients in the EA and SA groups received treatments consisted of 24 sessions, each for 30 minutes, and were administered over 8 consecutive weeks. Disposable needles (Hwatuo) and the SDZ-V EA apparatus (Suzhou Medical Appliance co., ltd) were used. Study interventions were developed by the consensus of clinical acupuncture experts and the literature analysis on acupuncture treatment of abdominal obesity. Participants in the EA group received EA at the bilateral acupoints of Zusanli (ST36), Sanyinjiao (SP6), Tianshu (ST25), Shuidao (ST28), Daheng (SP15), Daimai (GB26), Huaroumen (ST24) and Fujie (SP14). Besides, Shuifen (CV9) and Zhongwan (CV12) according to the World Health Organization standard (table 1). When participants were supine, 0.30 × 50 –mm or 0.35 × 75–mm needles were inserted approximately 10 to 30 mm into selected acupoints slowly and vertically, with manipulation of twirling, lifting, and thrusting until reach acupuncture de qi-a soreness, heaviness, and distension sensation. Paired alligator clips from the EA apparatus are attached transversely to the needle holders at bilateral ST25 and SP15. The EA stimulation lasted for 30 minutes with a dilatational wave of 10/50 Hz and a current intensity of 0.1 to 1 mA depending on the participant's comfort level.

**Table 1** Details of the acupoints used in the EA group

| Acupoints | Locations | Insertion depth (cun*) |
| --- | --- | --- |
| Zusanli (ST36) | 3 cun directly below Dubi (ST35), and one finger-breadth lateral to the anterior border of the tibia | 1 to 2 |
| Sanyinjiao (SP6) | On the medial side of the calf ,3 cun above the tip of the medial malleolus, and the medial posterior margin of the tibia | 1 to 1.5 |
| Zhongwan (CV12) | On the anterior midline, 4 cun above the umbilicus | 1 to 1.5 |
| Tianshu (ST25) | On the same level of the umbilicus, and 2 cun lateral to the anterior midline | 1 to 1.5 |
| Shuifen (CV9) | On the upper abdomen ,1 cun above the umbilical cord, on the anterior median line | 1 to 2 |
| Daheng (SP15) | On the abdomen,4 cun lateral to the belly button | 1 to 1.5 |
| Daimai (GB26) | On the lateral abdomen, the 11 th rib free end vertical line and the umbilical horizontal line intersection point | 0.8 to 1 |
| Shuidao (ST28) | On the lower abdomen ,3 cun below the umbilical cord ,2 cun by the front median line | 1 to 1.5 |
| Huaroumen (ST24) | On the upper abdomen ,1 cun above the umbilical cord ,2 cun lateral to the front median line | 0.8 to 1.2 |
| Fujie (SP14) | On the lower abdomen, the umbilical cord is 1.3 cun, 4 cun lateral to the front median line | 1 to 1.5 |
| *cun, a proportional body-based unit of length in Traditional Chinese Medicine, commonly defined as the patient’s thumb width | | |

Sham acupuncture group: Sham acupuncture needles (0.30 × 50 –mm or 0.35 × 75–mm) with flat tips (Hwato, Suzhou, China) were inserted towards the “placebo acupoints” (located at 1 cun lateral to acupoints for EA) to induce slight pain but without penetrating the skin and needle manipulation for De qi.[41] (Fig.2) Similar to EA, paired alligator clips from the specially constructed EA apparatus were attached to the needle holders of sham ST25 and sham SP15. When switched on, the EA apparatus in the SA group has the same working power indicator and the internal output power cord of the EA stimulation instrument is interrupted. Fig3 show the location of acupoints in the EA and SA group.


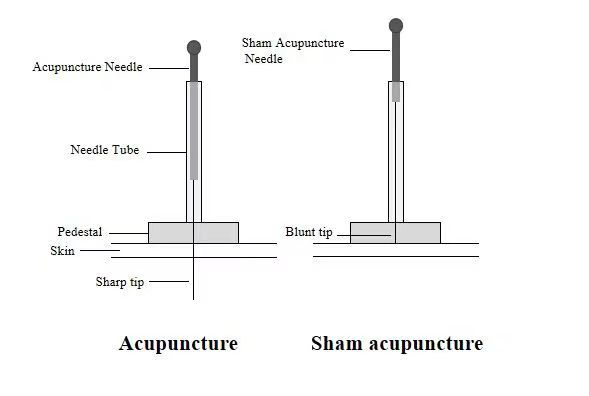


Fig 2 Illustration of acupuncture and sham acupuncture intervention.


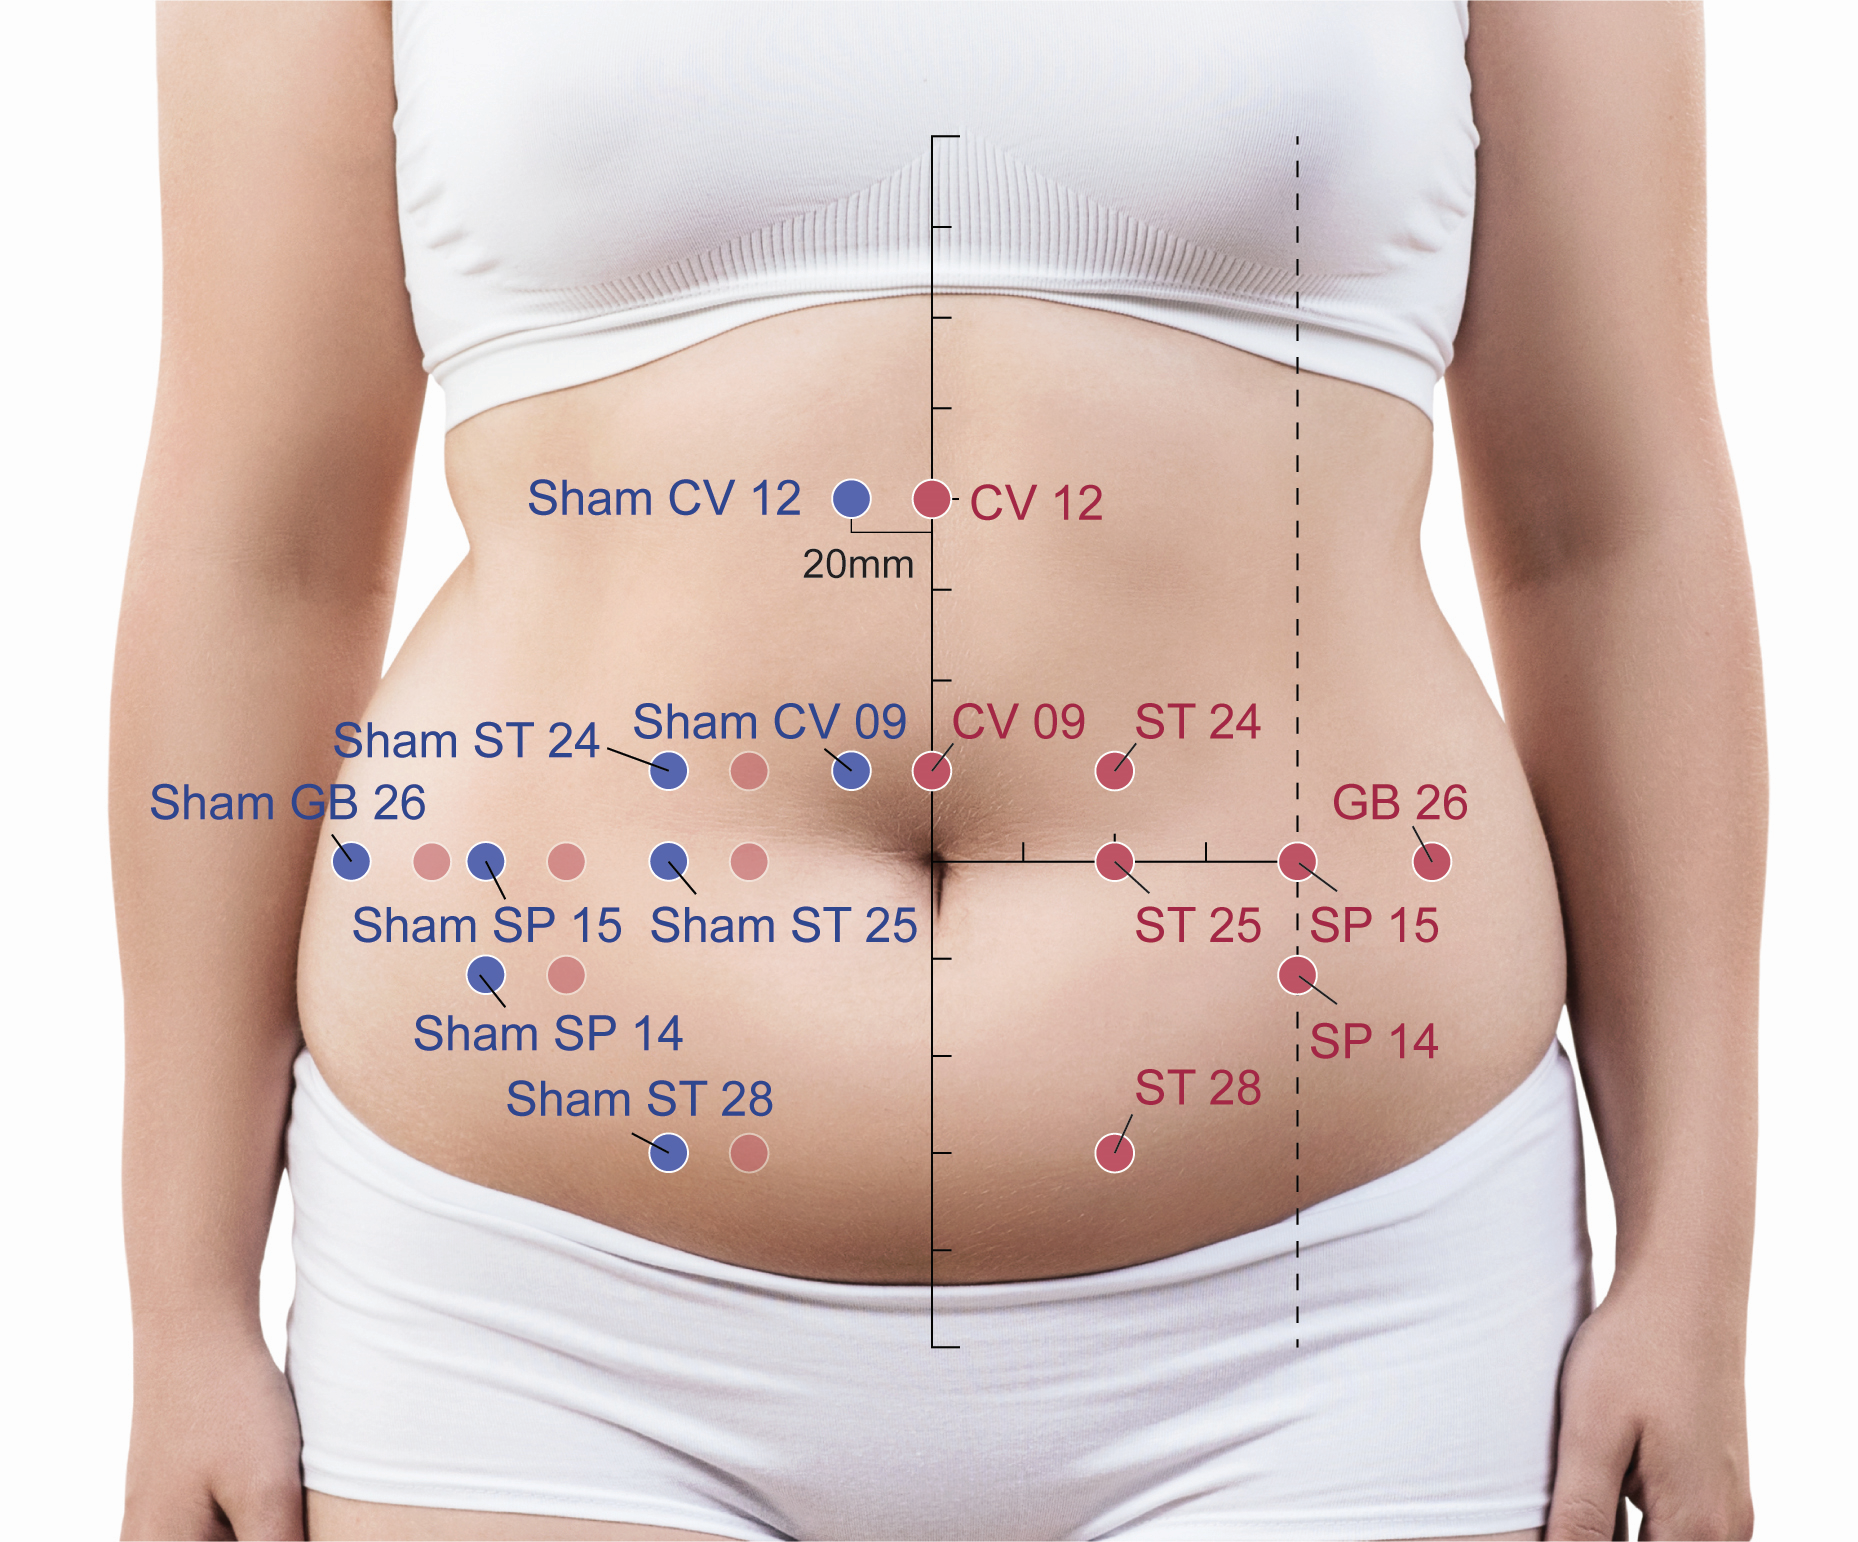

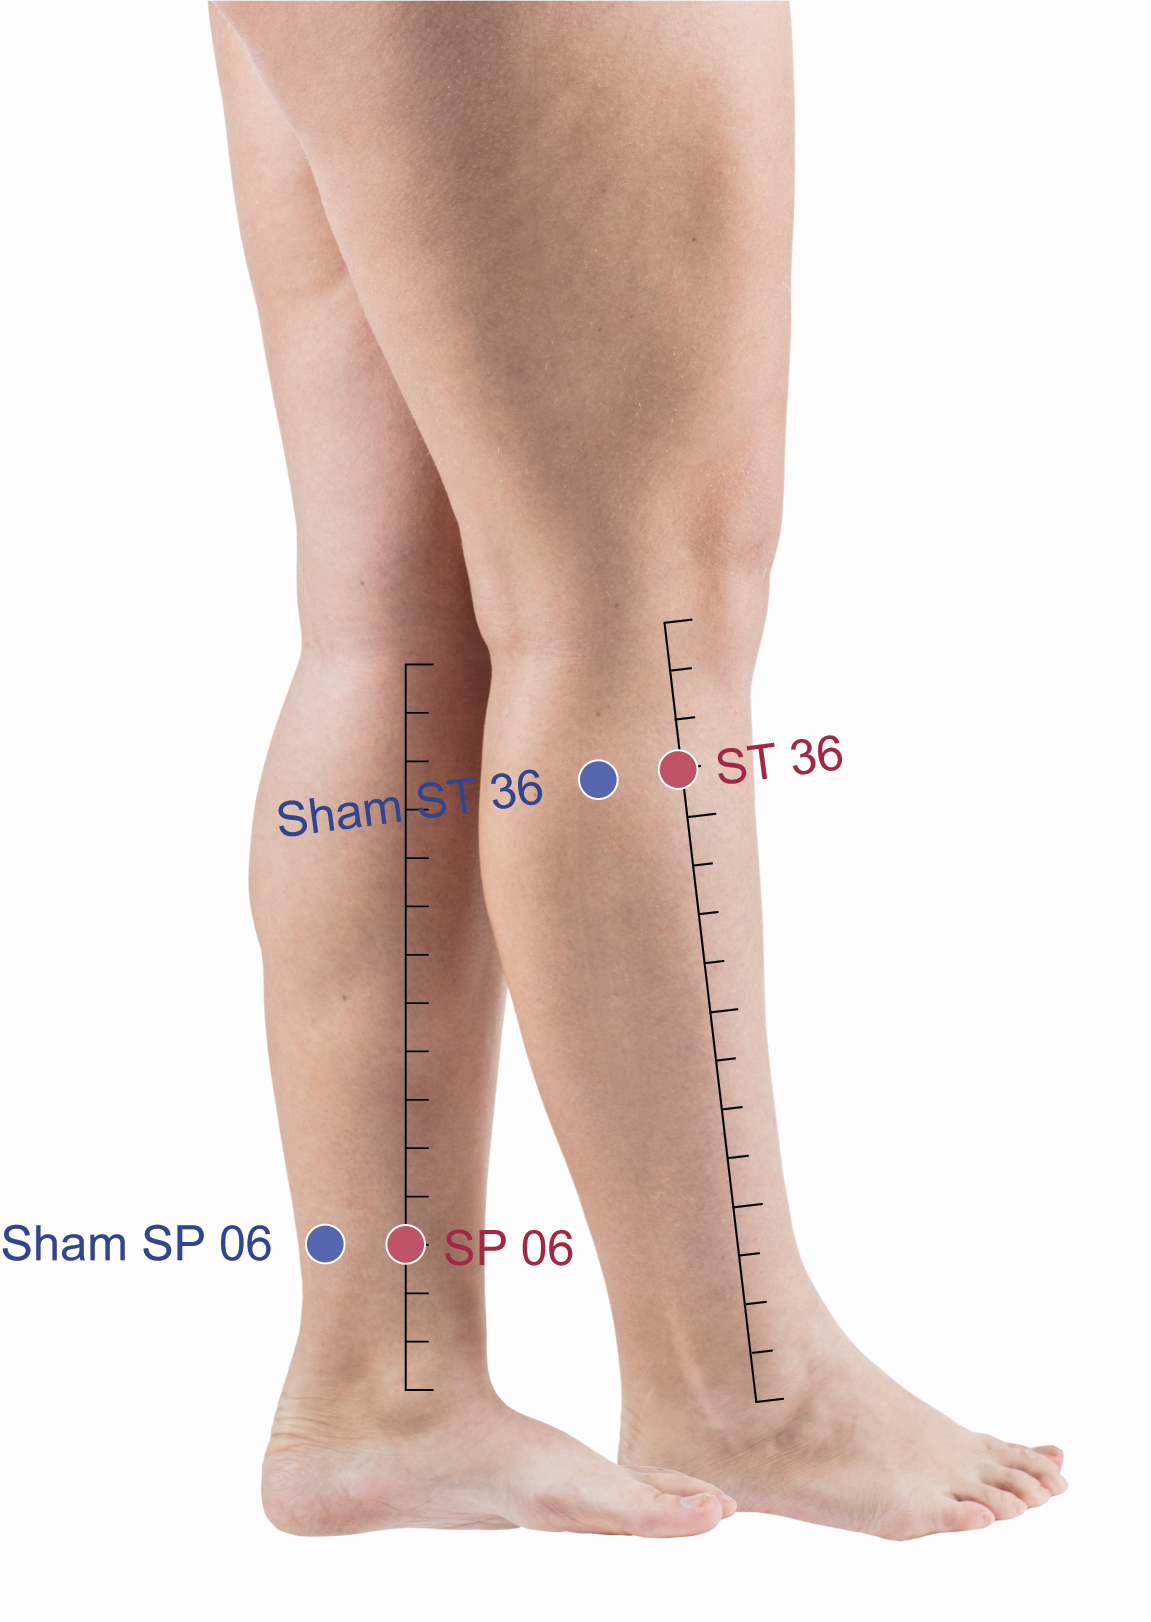


Fig 3 Locations of acupoints. ST25, Tianshu; ST28, Shuidao; SP15, Daheng; GB26, Daimai; ST24, Huaroumen; SP14, Fujie; CV9, Shuifen; CV12, Zhongwan; ST36, Zusanli; SP6, Sanyinjiao.

**Randomization and Masking**

Simple randomization will be applied in this trial. Subjects who are eligible and give validated informed consent will be randomized in a 1:1 ratio to receive EA intervention or SA intervention. The randomization numbers will be generated by a third-party statistical programmer using a computer program. Computerized random numbers will be generated by the principal investigator and kept in a sealed, opaque envelope. After the subject’s random number is determined, will arrange an acupuncturist to conduct the corresponding intervention. The acupuncturists are not involved in the outcome assessment or data analysis. Outcome assessors and participants are blinded to the allocation. Patients will be treated in a closed unit, wearing eye masks during each session, and are not allowed to communicate with each other to avoid unblinding. [42].

**Sample size**

It will be designed as a superiority study with a 1:1 ratio. Based on a previous EA study and related literature [43], the decline in waist circumference was 4.8±1.2 cm in the EA group and 2.5±1.1 cm in the SA group. To detect the superiority of difference between the two groups to 1.3 cm as the minimal clinically important difference, a total of 58 subjects is required to obtain at least 90% power and control alpha level at 0.025 (one-sided). A drop-out rate of 15% is assumed, the final sample size will be determined to be 68 subjects, 34 subjects in each group. The sample size will be estimated using SAS 9.4 (SAS Institute Inc., Cary, NC, USA).

**End points and assessments**

***Primary outcome measures***

The primary end points are the change in waistline from baseline to week 8. Waistline is an anthropometric index that can substitute as a measure of abdominal fat mass because high waistline values are also positively correlated with obesity related diseases, especially cardiovascular complications [44].

***Secondary efficacy outcome measures***

Confirmatory secondary end points are weight, BMI, HC, WHR, IWQOL-Lite and Kessler 10 questionnaire, which are measured before and after treatment as a supportive secondary end point. Weight is a classical indicator to reflect whether the intake and consumption of energy are balanced. It is also an important indicator to reflect the severity and prognosis of the obesity. We also choose weight as one of the primary outcome measures for its objectivity, dynamicity, and easy to use. Weight, BMI, HC and WHR will be measured as supplements to waistline. IWQOL-Lite questionnaire is an instrument that has been widely used to assess the impact of weight on quality of life in a variety obese. IWQOL-Lite has been shown to have good internal consistency, good test-retest reliability, and responsiveness to weight loss and weight gain, and sensitivity to treatment-seeking status [45]. Kessler 10 scale is an effective tool that can evaluate the psychological status of people and is suitable for large-scale population mental health survey. The scale has 10 items, which are the frequency of nonspecific mental health related symptoms such as anxiety and stress level experienced in the past 4 weeks.

***Assessment of gut microbiome and metabolic parameters***

Specimen collection

Participants in the EA group (pre- and post-treatment) and HC provided stool and blood samples under fasting conditions in the morning. Approximately 3-5 g of fresh stool was collected and, along with the aliquoted serum obtained from blood samples (collected in heparinized tubes, kept at 4°C for 1 hour, and centrifuged at 2000 rpm for 10 minutes), was stored at -80°C for long-term preservation and subsequent analyses.

Analysis of Untargeted Lipidomics

The serum lipidomics analysis in the study involved the following detailed methodology:

(1) Lipids Extraction

Serum samples were thawed and mixed with MTBE:MeOH (3:1, v/v), followed by vortexing for 15 minutes to extract total lipids. Subsequently, 200 μL of water was added, and the mixture was vortexed for an additional 1 minute. Samples were centrifuged at 12,000 rpm for 10 minutes. After centrifugation, 200 μL of the upper organic layer was transferred to a new tube and evaporated to dryness using a vacuum concentrator to remove the solvent. The dried lipid extract was reconstituted in 200 μL ACN:IPA (1:1, v/v) for subsequent LC-MS/MS analysis.

(2) Chromatography and Mass Spectrometry Conditions

Lipidomics analysis was performed using an LC-ESI-MS/MS system. Chromatography was carried out on a Thermo Accucore™ C30 column, with mobile phase A consisting of acetonitrile/water (60:40, v/v) and mobile phase B consisting of acetonitrile/isopropanol (10:90, v/v), using a gradient elution. The flow rate was 0.35 mL/min, the column temperature was maintained at 45 °C, and the injection volume was 2 μL. The column effluent was introduced into a QTRAP® triple quadrupole-linear ion trap mass spectrometer equipped with an ESI Turbo Ion-Spray interface, operating in both positive and negative ion modes. Key parameters included GS1 = 45 psi, GS2 = 55 psi, curtain gas (CUR) = 35 psi, collision gas at medium strength, source temperature 500 °C, and ion spray voltage +5500 V (positive) / -4500 V (negative). Instrument tuning and mass calibration were performed using 10 and 100 μmol/L polypropylene glycol solutions, respectively. In QQQ mode, metabolites were monitored using MRM experiments with optimized declustering potential (DP) and collision energy (CE). Lipidomics analysis was performed using a local metabolite database to qualitatively and quantitatively analyze the lipids in the samples.

(3) Quality Control

To ensure the stability and reliability of the lipidomics analysis, quality control (QC) samples were prepared by thoroughly mixing equal volumes (10 μL each) of multiple serum samples. The QC samples were processed using the same extraction and analytical procedures as the test samples to ensure consistency across all steps. During the continuous analysis sequence, after every 10 test samples, a mixed QC sample and a solvent blank (pure acetonitrile) were automatically injected to monitor the consistency of sample preparation and the stability of the instrument.

(4) Lipidomic Analysis

Lipid analysis was carried out by using Analyst 1.6.1 software (AB SCIEX, Toronto, Ontario, Canada). Differentially expressed lipid species were identified based on a variable importance in projection (VIP) score > 1 from the orthogonal partial least-squares discriminant analysis (OPLS-DA) model and a fold change (FC) threshold of ≥ 1.2 or ≤ 0.8341.

Analysis of intestinal microbiota

This study employed 16S rRNA sequencing to analyze the intestinal microbiota. The methodology was as follows:

(1) DNA Sequencing and PCR Amplification

Genomic DNA was extracted from stool samples using the CTAB method. The V3-V4 hypervariable regions of the bacterial 16S rRNA gene were amplified using barcoded specific primers and a high-fidelity polymerase, following the manufacturer’s instructions, to ensure accurate amplification.

(2) Quality Control

PCR products were first assessed by electrophoresis on a 2% agarose gel to confirm specificity and expected band size. Qualified products were then purified using magnetic beads or a gel extraction kit, quantified, and pooled in equimolar amounts to prepare samples for subsequent sequencing.

(3) 16S rRNA Sequencing

The sequencing libraries were prepared using the TruSeq® DNA PCR-Free Sample Preparation Kit. The constructed libraries were quantified and quality-checked using Qubit and qPCR to ensure they met the required standards. Qualified libraries were then sequenced on the NovaSeq 6000 platform to generate raw sequence data. Sequencing data quality was assessed by evaluating Q30 scores, read length, and GC content, and low-quality reads or adapter contamination were removed. Finally, DNA fragments shorter than twice the read length were merged using FLASH software to improve sequence accuracy and effective length.

(4) Operational Taxonomic Units Construction

Raw sequencing data were subjected to quality control and merging to obtain high-quality sequences (Clean Data). Based on these data, Operational Taxonomic Unit (OTU) clustering was performed, grouping sequences with ≥97% similarity into the same OTU. Representative sequences from each OTU were then selected for taxonomic annotation, yielding corresponding species information and abundance distributions at the taxonomic level.

(5) Microbial Analysis

Microbial diversity was assessed using α-diversity indices to evaluate species richness and diversity, thereby exploring community structure differences among groups. Statistical methods including T-test, and LEfSe analysis were applied to test the significance of differences in species composition and community structure between groups.

Assessment of gut microbiome and metabolic parameters analysis will be performed by Wuhan metware Biotechnology Co., Ltd.

***Safety evaluation***

Safety evaluation related to EA includes needle breakage, needle loss, needle fainting, unbearable acupuncture pain (VAS≥8 points), local hematoma, infection and abscess. Furthermore, symptoms, average degree, and average duration of other discomforts after EA (post acupuncture pain, nausea, vomiting, palpitation, dizziness, headache, anorexia and insomnia with a duration of 0.5 hour or more after needle acupuncture) will be assessed and recorded. We will form a specific record form and ask whether the above situation occurs at every follow-up visit.

**Data processing and analysis**

The final analysis was performed based on the intention to treat principle. We performed statistical descriptions for the two groups, categorical variables were described using frequencies and percentages, and continuous variables were expressed as mean with standard deviation or median with interquartile ranges (IQRs) based on normality test. For primary and secondary endpoints using changes from baseline as outcomes, analysis of covariance (ANOCOVA) was performed to estimate the adjusted difference in changes between the two groups and corresponding 95% confidence interval, meanwhile, baseline group variable of interest, sex and age were included as covariant variables. Missing data were handled using the last observation carried forward (LOCF) method for continuous outcomes. The incidence of adverse (AEs) effects in each group were reported along with an exact (Clopper-Pearson) two-sided 95% CI for percentage. James Blinding Index were used to assess the success of blinding. We compared the proportions of participants who guessed that they had received EA between groups. All analyses were done with SAS software (version 9.4; SAS Institute Inc., Cary, NC, USA).

Focus on the training of the project implementation scheme and various standard operation procedures (SOP), so that each clinical researcher can be familiar with the research process and specific implementation rules, so as to improve the consistency of Internal observation and between observers and ensure the reliability of clinical research conclusions.

**Quality control**

This study has a randomized sham-controlled design, to avoid selection bias. Strict control of the inclusion criteria is one of the most important ways to control bias. Formulating specific inclusion criteria and exclusion criteria, strictly restraining the study object within a certain scope and reducing differences contribute to the achievement of objective conclusions. To ensure a smooth study, specialized clinical training will be conducted for all the clinical researchers participated before the ignition of the trial. Training regarding the study design and standard operation procedures (SOPs) will be performed to familiarize each clinical researcher with the study process to improve consistency between the internal observations of researchers and between observers to ensure reliability of the conclusions. Each center will design quality control measures and undergo regular inspections to control for center bias.

**Discussion**

The study is planned as a patient-assessor blinded, randomized, sham-controlled clinical trial. To date, there is no study deeply analysis the clinical indicators of abdominal obesity after EA treatment, compared with placebo. No studies examine the potential mechanism of metabolomics and intestinal flora differences in acupuncture’s curative effect in abdominal obesity. Therefore, our study will be the first clinical trial on the Chinese abdominal obesity, which will obtain clinical and mechanism evidence to evaluate the efficacy and safety of EA for abdominal obesity.

Abdominal obesity is the common pathophysiologic basis of multiple metabolic diseases, which has become a severe public health problem on a global scale. The management of waistline and weight plays an important role in multiple chronic diseases. Acupuncture, especially EA, is an acceptable adjunct to lifestyle interventions for the control of waistline and weight loss in abdominal obesity and so could improve the treatment of obesity and its associated diseases. Whereas, evidence for acupuncture’s utility for abdominal obesity is limiting.

In this trial, we will find out whether adults with abdominal obesity have significant difference in waistline from baseline with EA as an adjunct to lifestyle intervention after 8 weeks, which will exceed that with placebo plus lifestyle intervention. Secondary end points that weight, BMI, HC and WHR are the supplementary indicators for evaluating effectiveness. IWQOL-Lite and Kessler 10 will be assessed as the change of quality of life and mental health of abdominal obesity in EA group.

Metabolomics represents an important component of systems biology research, which is thought to be closely related to a TCM perspective and focuses on systemic and holistic treatment. Therefore, metabolism studies are gaining attention in the field of acupuncture trials. Several of studies suggested that acupuncture might specifically contribute to weight loss by modulating various metabolic functions, such as serum immunoglobulin G, serum leptin, adiponectin levels, serum glucose, insulin and c-peptide levels [46-47]. With the in-depth study of intestinal flora, research has highlighted links between the gut microbiota, obesity and insulin resistance [48-49]. Intestinal flora is also a way to study TCM, especially to elucidate the profound theory of acupuncture. To obtain further insight into the mechanisms, metabolomics and intestinal flora study will be conducted to explain part of the mechanism of EA in the treatment of abdominal obesity.

***References***

1. Organization W H. Obesity: preventing and managing the global epidemic. [J]. World Health Organization Technical Report, 1998, 894(1):1-253.

2. B.-Y. Park, M. J. Lee, M. Kim, et al. Structural and functional brain connectivity changes between people with abdominal and non-abdominal obesity and their association with behaviors of eating disorders [J]. Frontiers in Neuroscience, 2018, 12:741.

3. S. Yusuf, S. Hawken, S. Ounpuu et al. Effect of potentially modifiable risk factors associated with myocardial infarction in 52 countries (the INTERHEART study): Case-control study[J].The Lancet, 2004,364(9438):937-952.

4. Freisling Heinz, Arnold Melina, Soerjomataram Isabelle et al. Comparison of general obesity and measures of body fat distribution in older adults in relation to cancer risk: meta-analysis of individual participant data of seven prospective cohorts in Europe [J].British Journal of Cancer, 2017, 116:1486-1497.

5. NCD Risk Factor Collaboration (NCD-RisC), Trends in adult body-mass index in 200 countries from 1975 to 2014: a pooled analysis of 1698 population-based measurement studies with 19·2 million participants. [J] .Lancet, 2016, 387: 1377-1396.

6. The Heavy Burden of Obesity. [M]. OECD, 2019.

7. Garvey WT, Mechanick JI, Brett EM, et al. American Association of Clinical Endocrinologists and American College of Endocrinology comprehensive clinical practice guidelines for medical care of patients with obesity. Endocr Pract 2016; 22: Suppl 3:1-203.

8. Yumuk V, Tsigos C, Fried M, et al. European guidelines for obesity management in adults. Obes Facts 2015; 8:402-424.

9. Sumithran P, Prendergast LA, Delbridge E, et al. Long-term persistence of hormonal adaptations to weight loss. N Engl J Med 2011; 365:1597-604.

10. Du F, Virtue A, Wang H, Yang XF. Metabolomic analyses for atherosclerosis, diabetes, and obesity. Biomark Res (2013) 1(1):1–17. doi: 10.1186/2050-7771-1-17

11. Bessesen DH, Van Gaal LF. Progress and challenges in anti-obesity pharmacotherapy. Lancet Diabetes Endocrinol 2018; 6:237-248.

12. Viner RM, et al. Efficacy and safety of anti-obesity drugs in children and adolescents: systematic review and meta-analysis. Obes Rev. 2010; 11(8):593–602.

13. Chan EW, et al. Efficacy and safety of lorcaserin in obese adults: a metaanalysis of 1-year randomized controlled trials (RCTs) and narrative reviewon short-term RCTs. Obes Rev. 2013; 14(5):383–392.

14. Scheen AJ, Van Gaal LF. Combating the dual burden: therapeutic targeting of common pathways in obesity and type 2 diabetes. Lancet Diabetes Endocrinol. 2014; 2(11):911–22.

15. Garvey W. New tools for weight-loss therapy enable a more robust medical model for obesity treatment: rationale for a complications-centric approach [J]. Endocrine Practice, 2013, 19(5):864-874.

16. Vetter ML, Faulconbridge LF, Webb VL, et al. Behavioral and pharmacologic therapies for obesity. Nature Reviews Endocrinology, 2010, 6(10):578-588.

17. Hsu CH, Hwang KC, Chao CL, et al. Effects of electroacupuncture in reducing weight and waist circumference in obese women: a randomized crossover trial. International Journal of Obesity. 2005; 29:1379-1384.

18. Levine JA. Obesity in China: causes and solutions. Nalt Med J China. 2008; 11:1043-1050.

19. Ma K. Acupuncture: its place in the history of Chinese medicine. Acupuncture Med (2000) 18(2):88–99.

20. Liu Z, Yan L, Xu H, et al. Effect of Electroacupuncture on Urinary Leakage Among Women With Stress Urinary Incontinence: A Randomized Clinical Trial [J]. JAMA, 2017, 317(24):2493.

21. Liu Z, Yan S, Wu J, et al. Acupuncture for Chronic Severe Functional Constipation: A Randomized Trial. [J]. Annals of Internal Medicine, 2016.]

22. Zhang Y, Li J, Mo G, et al. Acupuncture and Related Therapies for Obesity: A Network Meta-Analysis [J]. Evidence-based Complementary and Alternative Medicine, 2018, 2018:1-20.

23. Hong H. Electroacupunture reduces body weight and fat mass by changing expression genes related to loss of stat5 in central nervous system. J Integr Med (2014) 109(3):172.

24. M. T. Cabıo˘glu and N. Ergene, Electroacupuncture therapy for weight loss reduces serum total cholesterol, triglycerides, and LDL cholesterol levels in obese women,” American Journal of Chinese Medicine, vol. 33, no. 4, pp. 525–533, 2005.

25. Y. Guo, M. Xing, W. Sun, X. Yuan, H. Dai, and H. Ding, “Plasma nesfatin-1 level in obese patients afer acupuncture: A randomised controlled trial,” Acupuncture in Medicine, vol. 32, no. 4, pp. 313–317, 2014.

26. J. A. Chen, J. A. Chen, S. Lee, and G. Mullin, “Potential role for acupuncture in the treatment of food addiction and obesity,” Acupuncture in Medicine, vol. 27, no. 9, p. 113, 2017

27. Rangel-Huerta Oscar Daniel, Pastor-Villaescusa Belén, and Gil Angel, “Are we close to defining a metabolomic signature of human obesity? A systematic review of metabolomics studies,” Metabolomics, vol. 15, no. 6, p. 93, 2019

28. Morais Tiago, Seabra Alexandre L, Patrício Bárbara G et al. Visceral Adipose Tissue Displays Unique Metabolomic Fingerprints in Obesity, Pre-Diabetes and Type 2 Diabetes.[J] .Int J Mol Sci, 2021, 22:5695.

29. Gao Jun,Liu Xu-guang,Yan Xian-zhong et al. Primary anylasis on the methodology and strategies for studying mechanisms of acu-moxibustion by using metabonomics.[J] .Zhen Ci Yan Jiu, 2011, 36: 296-301.

30. Kim Koh-Woon,Shin Woo-Chul,Choi Min Sun et al. Effects of acupuncture on anthropometric and serum metabolic parameters in premenopausal overweight and obese women: a randomized, patient- and assessor-blind, sham-controlled clinical trial.[J] .Acupunct Med, 2021, 39: 30-40.

31. Cox, A.J., West, N.P. & Cripps, A.W. Obesity, inflammation, and the gut microbiota. Lancet Diabetes Endocrinol. 3, 207–215 (2015)

32. Gut microbiome and serum metabolome alterations in obesity and after weight-loss intervention [J]. Nat Med. 2017 Jul; 23(7):859-868.

33. Wang H, Wang Q, Liang C , et al. Acupuncture Regulating Gut Microbiota in Abdominal Obese Rats Induced by High-Fat Diet[J]. Evidence-based Complementary and Alternative Medicine, 2019, 2019(1):1-12.

34. Z. Xu, R. Li, C. Zhu, and M. Li, “Effect of acupuncture treatment for weight loss on gut fora in patients with simple obesity,” Acupuncture in Medicine, vol. 31, no. 1, pp. 116-117, 2013.

35. Ridaura, V.K. et al. Gut microbiota from twins discordant for obesity modulate metabolism in mice. Science 341, 1241214 (2013).

36. Qu F, Cui Y, Zeng J, Zhang M, Qiu S, Huang X, et al. Acupuncture induces adenosine in fibroblasts through energy metabolism and promotes proliferation by activating MAPK signaling pathway via adenosine(3) receptor. J Cell Physiol (2020) 235(3):2441–51.

37. Schulz KF, Altman DG, Moher D. CONSORT 2010 statement: updated guidelines for reporting parallel group randomised trials. BMJ (Clinical research ed). 2010; 340:c332. 49.

38. MacPherson H, Altman DG, Hammerschlag R, Li YP, Wu TX, White A, et al. Revised Standards for Reporting Interventions in Clinical Trials of Acupuncture (STRICTA): extending the CONSORT Statement. J Altern Complement Med. 2010; 16(10):ST1–ST14.]

39. Garvey WT, Mechanick JI, Brett EM,et al.American association of clinical endocrinologists and American college of endocrinology comprehensive clinical practice guidelines for medical care of patients with obesity[J].Endocr Pract, 2016, 22 Suppl 3(aop):1.

40. Hunt K, Wyke S, Gray CM, et al. A gender-sensitised weight loss and healthy living programme for overweight and obese men delivered by Scottish Premier League football clubs (FFIT): a pragmatic randomised controlled trial. Lancet. 2014;383(9924):1211-1221

41 Zhao Ling, Li Dehua,Zheng Hui et al. Acupuncture as Adjunctive Therapy for Chronic Stable Angina: A Randomized Clinical Trial.[J] .JAMA Intern Med, 2019, 179: 1388-1397.

42 Bang H, Ni L, Davis CE. Assessment of blinding in clinical trials. Control Clin Trials. 2004;25(2):143-156.

43. ZHOU Wei，ZHOU Zhongyu，HU Feng, et al. Clinical Comparative Study on Electroacupuncture and Acupoint Catgut Embedding Therapy for Treatment of Obesity. Liaoning Journal of Traditional Chinese Medicine, 2020, 47 (9):156–158 Chinese.

44. Onat, A., G.S. Avei, M.M. Barlan, H. Uyarel, B. Uzunlar and V. Sanaoy. Measures of abdominal obesity assessed for visceral adiposity and relation to coronary risk. Int. J. Obes. Relat. Metab. Disord. 28: 1018–1025, 2004.

45. Ronette L Kolotkin, Ross D Crosby, Patricia K Corey-Lisle, et al. Performance of a weight-related measures of quality of life in a psychiatric sample. Qual Life Res. 2006 May; 15(4):587-596

46.Cha Hyun Su,Park Hyojung,Effects of auricular acupressure on obesity in adolescents.[J] .Complement Ther Clin Pract, 2019, 35: 316-322.

47. Kim Koh-Woon,Shin Woo-Chul,Choi Min Sun et al. Effects of acupuncture on anthropometric and serum metabolic parameters in premenopausal overweight and obese women: a randomized, patient- and assessor-blind, sham-controlled clinical trial.[J] .Acupunct Med, 2021, 39: 30-40.

48. Adalsteinsdottir Solveig A,Magnusdottir Ola K,Halldorsson Thorhallur I et al. Towards an Individualized Nutrition Treatment: Role of the Gastrointestinal Microbiome in the Interplay Between Diet and Obesity.[J] .Curr Obes Rep, 2018, 7: 289-293.

49. Aron-Wisnewsky Judith,Warmbrunn Moritz V,Nieuwdorp Max et al. Metabolism and Metabolic Disorders and the Microbiome: The Intestinal Microbiota Associated With Obesity, Lipid Metabolism, and Metabolic Health-Pathophysiology and Therapeutic Strategies.[J] .Gastroenterology, 2021, 160: 573-599.
